# Supplementary material
Source: publisher figshare collection journal article supplement (https://tandf.figshare.com/ndownloader/files/14906531)
Supplement: Supplementary file 1 [file 14906531]

# **Design, Synthesis and Biological Evaluation of Substituted 2-amino-1,3-thiazine derivatives as Antituberculosis and Anti-Cancer agents**

**Tangella Nagendra Prasad, Eeda Koti Reddy, Veera Babu Gudise, Shaik Firoj Basha and Shaik Anwar\***

*Division of Chemistry, Department of Science and Humanities, Vignan's Foundation for Science, Technology and Research -VFSTR (Deemed to be University), Vadlamudi, Guntur, 522 213, Andhra Pradesh, India*

[shaikanwarcu@gmail.com](mailto:shaikanwarcu@gmail.com); [shaik\\_sh@vignanuniversity.org](mailto:shaik_sh@vignanuniversity.org)

## **Supplementary Information (SI)**

|                      |               |
|----------------------|---------------|
| <b>Contents</b>      | <b>S1</b>     |
| <b>Figure 1</b>      | <b>S2</b>     |
| <b>Scheme 1</b>      | <b>S3</b>     |
| <b>Table 1</b>       | <b>S4</b>     |
| <b>Spectral Data</b> | <b>S5-S53</b> |
| <b>References</b>    | <b>S54</b>    |

**Figure 1: Some of the potent biological active compounds possessing thiazine core**

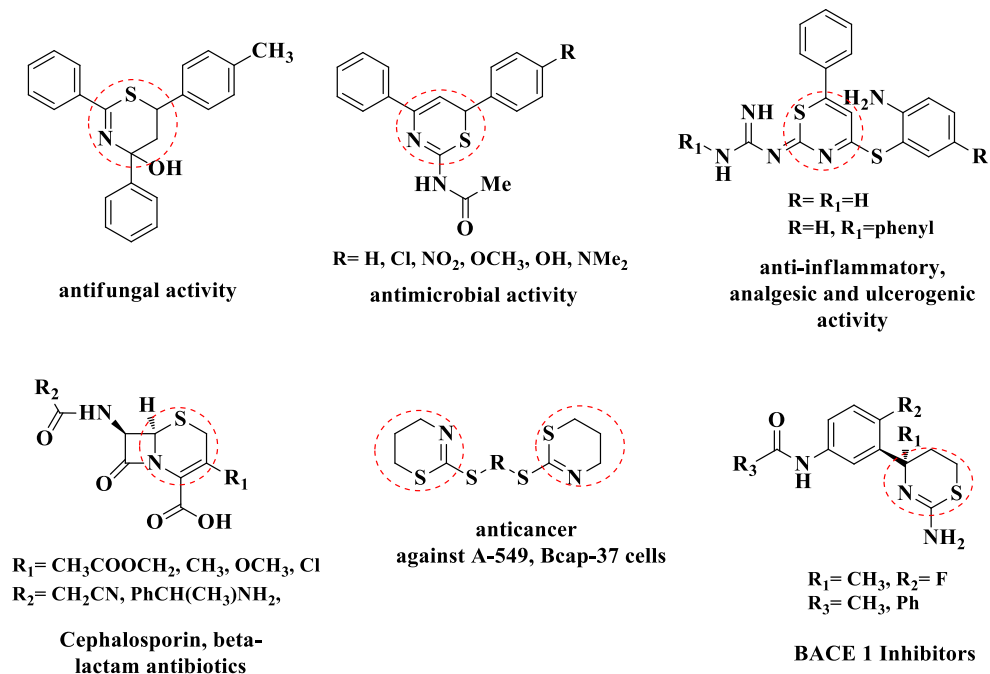

**Scheme 1: Synthesis of 1,3-thiazine derivatives (9a-9q).**

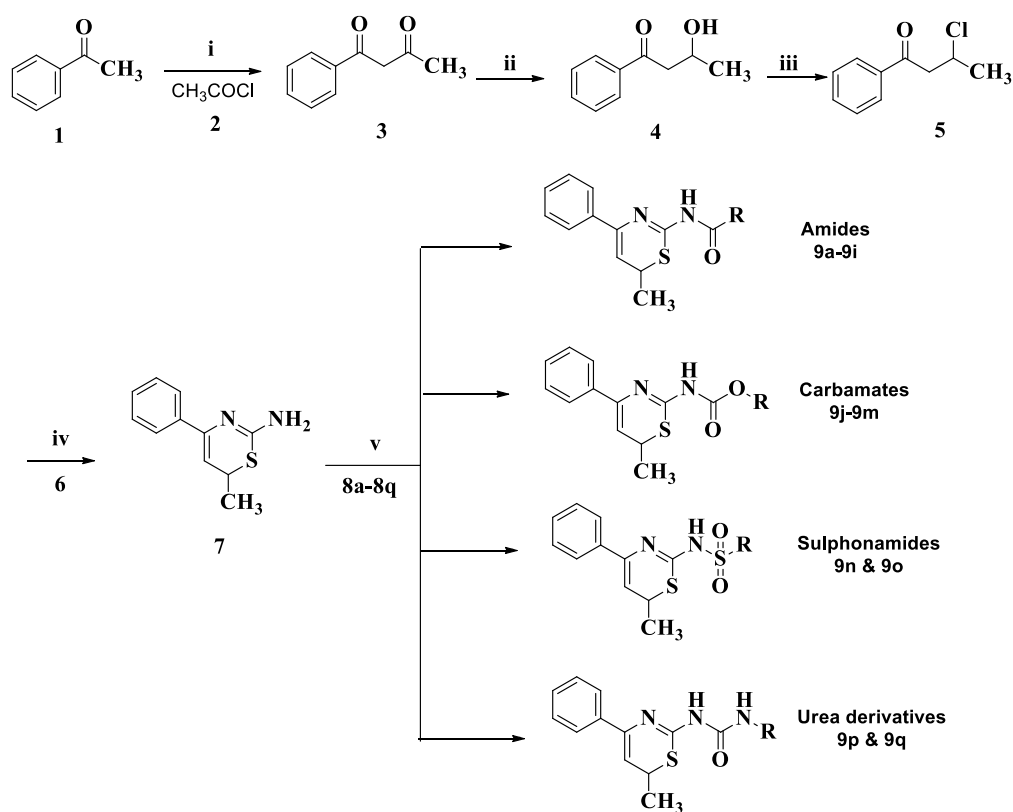

Reagents and conditions: (i) LiHMDS, Toluene, 0 °C, 1 h; (ii) LiHMDS, LiAlH<sub>4</sub>, THF, 0 °C, 1 h; (iii) SOCl<sub>2</sub>, CH<sub>2</sub>Cl<sub>2</sub>, DMF, RT, 3 h; (iv) Thiourea (**6**), Ethanol, 75 °C, 8 h; (v) Compounds **8a-8s**, DIPEA, CH<sub>2</sub>Cl<sub>2</sub>, r.t., 2 hr. **8a**-Pivaloyl chloride; **8b**-cyclopropanecarbonyl chloride; **8c**-cyclopentanecarbonyl chloride; **8d**-cyclohexanecarbonyl chloride; **8e**-isobutyryl chloride; **8f**-2,2-dimethyl butyryl chloride; **8g**-propionyl chloride; **8h**-butyryl chloride; **8i**-benzoyl chloride; **8j**-methyl chloroformate; **8k**-ethyl chloroformate; **8l**-isopropyl chloroformate; **8m**-*tert*-butylchloroformate; **8n**-methanesulfonyl chloride; **8o**-4-(trifluoromethoxy)benzene-1-sulfonyl chloride; **8p**-2-F-phenyl isocyanate; **8q**-2-Cl-Phenyl isocyanate.

**Table 1: Anti tuberculosis, anti-cancer activity results of 1,3-thiazine derivatives 9a-9q**

| S.No                    | Compounds (R)                         | Anti-TB<br>MIC in $\mu\text{g/mL}$ | Anti-cancer<br>Cytotoxicity % of inhibition at 25 $\mu\text{M}^a$ |         |
|-------------------------|---------------------------------------|------------------------------------|-------------------------------------------------------------------|---------|
|                         |                                       |                                    | MCF-7                                                             | EC-9706 |
| 1                       | <b>7</b>                              | > 25                               | 15.42                                                             | > 100   |
| <b>Amides</b>           |                                       |                                    |                                                                   |         |
| 2                       | <b>9a</b> ( <i>t</i> -butyl)          | 6.25                               | 22.46                                                             | 18.46   |
| 3                       | <b>9b</b> (cyclopropyl)               | 1.26                               | 1.73                                                              | 6.12    |
| 4                       | <b>9c</b> (cyclopentyl)               | >25                                | 24.19                                                             | 23.45   |
| 5                       | <b>9d</b> (cyclohexyl)                | >25                                | 10.55                                                             | 12.94   |
| 6                       | <b>9e</b> (isopropyl)                 | 25                                 | 20.50                                                             | 26.18   |
| 7                       | <b>9f</b> (1-(2-methyl)butyl)         | 6.25                               | > 100                                                             | 3.81    |
| 8                       | <b>9g</b> (Ethyl)                     | 25                                 | 34.18                                                             | 20.48   |
| 9                       | <b>9h</b> (Propyl)                    | 1.56                               | 5.48                                                              | 9.12    |
| 10                      | <b>9i</b> (Phenyl)                    | 0.78                               | 16.48                                                             | 20.92   |
| <b>Carbamates</b>       |                                       |                                    |                                                                   |         |
| 11                      | <b>9j</b> (methyl)                    | 6.25                               | 19.64                                                             | 30.27   |
| 12                      | <b>9k</b> (ethyl)                     | 6.25                               | 5.83                                                              | > 100   |
| 13                      | <b>9l</b> (isopropyl)                 | >25                                | > 100                                                             | 7.26    |
| 14                      | <b>9m</b> ( <i>t</i> -butyl)          | 3.12                               | 2.26                                                              | 5.18    |
| <b>Sulphonamides</b>    |                                       |                                    |                                                                   |         |
| 15                      | <b>9n</b> (Methyl)                    | >25                                | 3.68                                                              | 10.55   |
| 16                      | <b>9o</b> (4-OCF <sub>3</sub> phenyl) | 6.25                               | 7.69                                                              | > 100   |
| <b>Urea derivatives</b> |                                       |                                    |                                                                   |         |
| 17                      | <b>9p</b> (2-F phenyl)                | 3.12                               | 8.60                                                              | 2.61    |
| 18                      | <b>9q</b> (2-Cl phenyl)               | 6.25                               | > 100                                                             | 7.26    |
| <b>Standard</b>         |                                       |                                    |                                                                   |         |
| 19                      | Isoniazid                             | 0.72                               | ND                                                                | ND      |
| 20                      | Rifampicin                            | 0.24                               | ND                                                                | ND      |
| 21                      | Ethambutol                            | 7.64                               | ND                                                                | ND      |
| 22                      | Cisplatin                             | NA                                 | 4.12                                                              | 7.10    |

<sup>a</sup>Inhibitory activity was assayed by exposure for 72 h substances and expressed as concentration required to inhibit tumor cell proliferation by 50 % (IC<sub>50</sub>). ND means not done

### Materials and methods

All the starting materials and reagents were procured from commercial suppliers and used without purification. All new compounds were fully characterized. TLC analysis was performed using readily available TLC silica gel plates (Kieselgel 60 F254, Merck). IR (KBr) spectra was recorded as KBr pellets with Perkin–Elmer 400 FTIR spectrometer ( $\nu_{\text{max}}$  in  $\text{cm}^{-1}$ ). All synthesized compounds were purified by column chromatography using 230-400 silica gel. <sup>1</sup>H NMR spectra were recorded with 400 MHz. <sup>13</sup>C NMR spectra were recorded with 100 MHz and 125 MHz.

### ***Synthesis of 1-phenyl-1,3-butanedione (3)***

To a solution of compound **1** (15 g, 15 mmol) in toluene was added LiHMDS (38 mL 2M in THF, 187.5 mmol) at 0 °C and the RM was stirred for 30 min. To this RM was added acetyl chloride **2** (10.8 g, 137 mmol) at 0 °C and stirred for 30 min. After completion of SM (monitored by TLC), the RM was quenched with saturated aqueous NH<sub>4</sub>Cl solution (200 mL) and extracted with ethyl acetate (3 x 200 mL). The combined organic layers were dried over Na<sub>2</sub>SO<sub>4</sub> and purified by column chromatography (60-120 silica gel) using 10% ethyl acetate in hexane to afford pure compound 1-phenyl-1,3-butanedione (**3**) as white solid; Yield: 89 %; M.P: 54-58 °C <sup>1</sup>H NMR (400 MHz, CDCl<sub>3</sub>)  $\delta$ : 16.18 (brs, 1H), 7.87-7.89 (m, 2H), 7.54 (m, 1H), 7.59 (t, *J* = 8.0 Hz, 2H), 6.18 (s, 1H), 2.20 (s, 3H).

### ***Synthesis of 3-hydroxy-1-phenyl-1-butanone (4)***

To a solution of 1-phenyl-1,3-butanedione **3** (2.3 mmol) in THF (10 mL) was added LiHMDS (2.5 mmol) at 0 °C and the reaction mass was stirred for 30 min at same temperature. To this RM was added LiAlH<sub>4</sub> (4.6 mmol, 1 M solution in THF) at 0 °C and stirred at the same temperature for 30 min. The reaction mixture was quenched with cold water (20 mL) and extracted with ethyl acetate (20 mL). The combined organic layers were dried over Na<sub>2</sub>SO<sub>4</sub> and concentrated over vacuum. The crude product was purified by column chromatography using 30% ethyl acetate in hexane to afford pure product 3-hydroxy-1-phenyl-1-butanone (**4**). Colorless liquid; Yield: 81 %; <sup>1</sup>H NMR (400 MHz, CDCl<sub>3</sub>)  $\delta$ : 7.97 (d, *J* = 6.8 Hz, 2H), 7.61 (t, *J* = 8.0 Hz, 1H), 7.59 (t, *J* = 8.0 Hz, 2H), 4.43-4.41 (m, 1H), 3.31 (d, *J* = 3.0 Hz, 1H), 3.21-3.16 (dd, *J* = 3.0, 8.8 Hz, 1H), 3.08-2.97 (m, 1H), 1.28 (d, *J* = 6.4 Hz, 3H).

### ***Synthesis of 3-chloro-1-phenyl-1-butanone (5)***

SOCl<sub>2</sub> (12.6 g, 122.6 mmol) was added to a solution of 3-hydroxy-1-phenyl-1-butanone **4** (10 g, 61.3 mmol) in CH<sub>2</sub>Cl<sub>2</sub> at 0 °C followed by 0.1 mL of DMF stirred the reaction mixture at room temperature for 3 h. After completion of reaction on TLC concentrated the reaction mixture and purified by column chromatography on silica gel (5 % ethyl acetate in pet ether) to afford pure product 3-chloro-1-phenyl-1-butanone **5** in 10 g. Colorless liquid; Yield: 89%; <sup>1</sup>H NMR (400 MHz, CDCl<sub>3</sub>)  $\delta$ : 7.97 (d, *J* = 6.8 Hz, 2H), 7.61 (t, *J* = 8.0 Hz, 1H), 7.59 (t, *J* = 8.0 Hz, 2H), 4.80-

4.65 (m, 1H), 3.62 (dd,  $J = 3.0, 8.8$  Hz, 1H), 3.29 (dd,  $J = 3.0, 8.8$  Hz, 1H), 1.64 (d,  $J = 6.4$  Hz, 3H).

#### ***Synthesis of 6-Methyl-4-phenyl-6H-1,3-thiazin-2-amine (7)***

Thiourea **6** (4.6 g, 60.4 mmol) was added to a solution of 3-chloro-1-phenyl-1-butanone **5** (10 g, 54.94 mmol) in ethanol at room temperature and heated the reaction mixture to 75 °C for 8 h. After completion of reaction on TLC concentrated the reaction mixture was quenched with 180 mL of 10 % aqueous citric acid. The RM was extracted with ethyl acetate (3 x 150 mL), the aqueous layer was basified with 10% aqueous bicarbonate solution and then extracted with ethyl acetate (3x150 mL). The combined organic layers were dried over Na<sub>2</sub>SO<sub>4</sub> and concentrated. The crude product was purified by column chromatography on silica gel (20 % ethyl acetate in pet ether) to afford pure product 6-methyl-4-phenyl-2H-1,3-thiazin-2-amine **7** in 9.5 g. off white solid; Yield: 89 %; <sup>1</sup>H NMR (400 MHz, CDCl<sub>3</sub>)  $\delta$ : 7.70–7.63 (m, 2H), 7.37–7.29 (m, 2H), 7.28 (t,  $J = 1.4$  Hz, 1H), 5.54 (d,  $J = 5.7$  Hz, 1H), 4.92 (brs, 2H), 3.84–3.72 (m, 1H), 1.44 (d,  $J = 6.9$  Hz, 3H); IR (KBr, cm<sup>-1</sup>): 3445, 3272, 3052, 1631, 1550, 1298, 752; HRMS (ESI): calcd for C<sub>11</sub>H<sub>13</sub>N<sub>2</sub>S (M+H)<sup>+</sup>: 205.0799 found 205.0701.

#### ***General procedure for the synthesis of 9a-9q***

To a solution of 6-methyl-4-phenyl-2H-1,3-thiazin-2-amine **7** (1.4 mmol) in 2-3 mL CH<sub>2</sub>Cl<sub>2</sub> was added DIPEA at 0 °C maintained over 10 minutes, then acid chlorides **8a-8q** (1.76 mmol) was added and stirred the reaction mixture for 2 h at room temperature. After completion of reaction on TLC, the reaction mixture was quenched with cold ice water. Diluted with ethyl acetate, washed with aqueous bicarbonate solution, followed by brine solution organic layer was dried over Na<sub>2</sub>SO<sub>4</sub> then concentrated and purified by column chromatography on silica gel (10 % ethyl acetate in pet ether) to afford pure compounds.

#### ***N-(6-Methyl-4-phenyl-6H-1,3-thiazin-2-yl)pivalamide (9a)***

The compound **9a** was prepared according to general procedure by utilizing pivaloyl chloride **8a**. Pale yellow solid; Yield: 92%; M.P: 103-106 °C; <sup>1</sup>H NMR (400 MHz, CDCl<sub>3</sub>)  $\delta$ : 7.59 (d,  $J = 7.3$  Hz, 2H), 7.40–7.27 (m, 3H), 5.55 (d,  $J = 5.7$  Hz, 1H), 3.77–3.66 (m, 1H), 1.45 (d,  $J = 6.8$  Hz, 3H), 1.28 (s, 9H); <sup>13</sup>C NMR (100 MHz, CDCl<sub>3</sub>)  $\delta$  ppm: 188.50 (CO), 163.58 (C2), 143.04 (C6), 135.86 (ArC), 130.91 (ArC), 129.84 (ArC), 129.53 (ArC), 128.14 (ArC), 122.78 (ArC), 113.93

(C5), 42.41 (tert-C), 35.54 (C4), 28.95 ( $\underline{\text{CH}}_3$ ), 21.99 ( $\underline{\text{CH}}_3$ ). **IR** (KBr,  $\text{cm}^{-1}$ ): 3459 (NH str), 3256, 2967 ( $\text{CH}_3$  str), 1673 (CO str), 1557 (Ar-C=C str), 1230 (C=N str), 1216 (C-S-C str); **HRMS** (ESI): calcd for  $\text{C}_{16}\text{H}_{21}\text{N}_2\text{OS}$  ( $\text{M}+\text{H}$ )<sup>+</sup>: 289.1375 found 289.1424.

***N-(6-Methyl-4-phenyl-6H-1,3-thiazin-2-yl)cyclopropane carboxamide (9b)***

The compound **9b** was prepared according to general procedure by utilizing cyclopropane carbonyl chloride **8b**. Pale brown solid; Yield: 91 %; M.P: 130-133 °C; **<sup>1</sup>H NMR** (400 MHz,  $\text{CDCl}_3$ )  $\delta$ : 7.56 (dd,  $J = 1.7, 7.9$  Hz, 2H), 7.40–7.29 (m, 3H), 5.55 (d,  $J = 5.8$  Hz, 1H), 3.82-3.77 (m, 1H), 1.88-1.74 (m, 1H), 1.47 (d,  $J = 7.0$  Hz, 3H), 1.09 (td,  $J = 3.3, 4.6$  Hz, 2H), 0.88 (dd,  $J = 3.0, 8.0$  Hz, 2H); **<sup>13</sup>C NMR** (125 MHz,  $\text{CDCl}_3$ )  $\delta$  ppm: 189.82 (CO), 163.02 (C2), 143.44 (C6), 135.81 (ArC), 135.46 (ArC), 129.95 (ArC), 129.57 (ArC), 129.42 (ArC), 128.72 (ArC), 123.06 (C5), 30.39 (C4), 29.72 ( $\underline{\text{CH}}_3$ ), 21.72 ( $\underline{\text{CH}}_2$ ), 11.04 ( $\underline{\text{CH}}_2$ ). **IR** (KBr,  $\text{cm}^{-1}$ ): 3254 (NH str), 3002, 2980, 2915 ( $\text{CH}_2$  str), 1661 (CO str), 1616, 1598, 1552 (Ar-C=C str), 1229 (C-S-C str); **HRMS** (ESI): calcd for  $\text{C}_{15}\text{H}_{17}\text{N}_2\text{OS}$  ( $\text{M}+\text{H}$ )<sup>+</sup>: 273.1062 found 273.0961.

***N-(6-Methyl-4-phenyl-6H-1,3-thiazin-2-yl)cyclopentane carboxamide (9c)***

The compound **9c** was prepared according to general procedure by utilizing cyclopentane carbonyl chloride **8c**. Pale yellow solid; Yield: 88%; M.P: 85-88 °C; **<sup>1</sup>H NMR** (400 MHz,  $\text{CDCl}_3$ )  $\delta$ : 7.63–7.57 (m, 2H), 7.39–7.29 (m, 3H), 5.57 (d,  $J = 5.8$  Hz, 1H), 3.82-3.77 (m, 1H), 2.75 (p,  $J = 7.9$  Hz, 1H), 1.98-1.84 (m, 4H), 1.81–1.70 (m, 2H), 1.60-1.50 (m, 2H), 1.45 (d,  $J = 7.0$  Hz, 3H); **<sup>13</sup>C NMR** (100 MHz,  $\text{CDCl}_3$ )  $\delta$  ppm: 174.51 (CO), 153.87 (C2), 140.66 (C6), 137.30 (ArC), 132.22 (ArC), 130.63 (ArC), 129.33 (ArC), 128.53 (ArC), 127.17 (ArC), 123.71 (C5), 45.03 ( $\underline{\text{CH}}$ ), 32.76 (C4), 30.66 ( $\underline{\text{CH}}_2$ ), 30.15 ( $\underline{\text{CH}}_2$ ), 22.37 ( $\underline{\text{CH}}_3$ ), 18.40 ( $\underline{\text{CH}}_2$ ). **IR** (KBr,  $\text{cm}^{-1}$ ): 3436 (NH str), 2955 ( $\text{CH}_3$  str), 2867 ( $\text{CH}_2$  str), 1665 (CO str), 1560, 1491 (Ar-C=C str), 1444 (C=N str), 1222 (C-S-C str); **HRMS** (ESI): calcd for  $\text{C}_{17}\text{H}_{21}\text{N}_2\text{OS}$  ( $\text{M}+\text{H}$ )<sup>+</sup>: 301.1375 found 301.1354.

***N-(6-Methyl-4-phenyl-6H-1,3-thiazin-2-yl)cyclohexane carboxamide (9d)***

The compound **9d** was prepared according to general procedure by utilizing cyclohexane carbonyl chloride **8d**. Pale brown solid; Yield: 89 %; M.P: 136-139 °C; **<sup>1</sup>H NMR** (400 MHz,  $\text{CDCl}_3$ )  $\delta$ : 7.62–7.57 (m, 2H), 7.39–7.29 (m, 3H), 5.57 (d,  $J = 5.7$  Hz, 1H), 3.82-3.77 (m, 1H),

2.36–2.20 (m, 1H), 1.92 (d,  $J = 8.2$  Hz, 2H), 1.85–1.76 (m, 2H), 1.71–1.63 (m, 1H), 1.45 (d,  $J = 6.9$  Hz, 6H), 1.35–1.21 (m, 3H);  $^{13}\text{C}$  NMR (100 MHz,  $\text{CDCl}_3$ )  $\delta$  ppm: 174.38 (CO), 157.68 (C2), 143.68 (C6), 135.24 (ArC), 133.72 (ArC), 130.26 (ArC), 127.19 (ArC), 126.02 (ArC), 123.60 (ArC), 119.01 (C5), 45.28 ( $\underline{\text{CH}}$ ), 30.53 (C4), 28.03 ( $\underline{\text{CH}_2}$ ), 25.29 ( $\underline{\text{CH}_2}$ ), 22.68 ( $\underline{\text{CH}_2}$ ), 18.32 ( $\underline{\text{CH}_2}$ ), 16.11 ( $\underline{\text{CH}_3}$ ). IR (KBr,  $\text{cm}^{-1}$ ): 3446 (NH str), 3043 (=CH str), 2973 ( $\text{CH}_3$  str), 2925 ( $\text{CH}_2$  str), 1667 (CO str), 1560 (Ar-C=C str), 1444 (C=N str), 1220 (C-S-C str); HRMS (ESI): calcd for  $\text{C}_{18}\text{H}_{23}\text{N}_2\text{OS}$  ( $\text{M}+\text{H}$ ) $^+$ : 315.1531 found 315.1441.

***N*-(6-Methyl-4-phenyl-6H-1,3-thiazin-2-yl)isobutyramide (9e)**

The compound **9e** was prepared according to general procedure by utilizing isobutyryl chloride **8e**. Yield: 90 %; M.P: 128-131 °C;  $^1\text{H}$  NMR (400 MHz,  $\text{CDCl}_3$ )  $\delta$ : 7.63–7.54 (m, 2H), 7.39–7.30 (m, 3H), 5.57 (d,  $J = 5.7$  Hz, 1H), 3.83–3.78 (m, 1H), 2.64–2.52 (m, 1H), 1.46 (d,  $J = 7.0$  Hz, 3H), 1.21 (d,  $J = 6.9$  Hz, 6H);  $^{13}\text{C}$  NMR (100 MHz,  $\text{CDCl}_3$ )  $\delta$  ppm: 180.12 (CO), 163.42 (C2), 140.17 (C6), 134.79 (ArC), 130.44 (ArC), 129.73 (ArC), 128.51 (ArC), 126.16 (ArC), 122.80 (ArC), 115.83 (C5), 40.13 ( $\underline{\text{C}}(\text{CH}_3)_2$ ), 30.19 (C4), 25.27 ( $\underline{\text{CH}_3}$ ), 23.75 ( $\underline{\text{CH}_3}$ ). IR (KBr,  $\text{cm}^{-1}$ ): 3436 (NH str), 3041 (=CH str), 2971 ( $\text{CH}_3$  str), 1676 (CO str), 1559, 1469 (Ar-C=C str), 1442 (C=N str), 1241 (C-S-C str); HRMS (ESI): calcd for  $\text{C}_{15}\text{H}_{19}\text{N}_2\text{OS}$  ( $\text{M}+\text{H}$ ) $^+$ : 275.1218 found 275.1166.

***2,2-dimethyl-N*-(6-methyl-4-phenyl-6H-1,3-thiazin-2-yl)-butanamide (9f)**

The compound **9f** was prepared according to general procedure by utilizing 2,2-dimethyl butyryl chloride **8f**. Brown color liquid; Yield: 92 %;  $^1\text{H}$  NMR (400 MHz,  $\text{CDCl}_3$ )  $\delta$ : 7.59 (d,  $J = 7.3$  Hz, 2H), 7.40–7.32 (m, 3H), 5.55 (d,  $J = 5.8$  Hz, 1H), 3.82–3.72 (m, 1H), 1.64 (q,  $J = 7.5$  Hz, 2H), 1.56 (d,  $J = 6.8$ , 3H), 1.44 (s, 6H), 1.24 (s, 3H);  $^{13}\text{C}$  NMR (100 MHz,  $\text{CDCl}_3$ )  $\delta$  ppm: 181.19 (CO), 165.23 (C2), 141.72 (C6), 136.46 (ArC), 133.42 (ArC), 128.61 (ArC), 127.02 (ArC), 126.66 (ArC), 123.79 (ArC), 117.17 (C5), 45.78 ( $\underline{\text{C}}(\text{CH}_3)_2$ ), 34.15 ( $\underline{\text{CH}_2}$ ), 32.45 (C4), 26.79 ( $\underline{\text{CH}_3}$ ), 24.13 ( $\underline{\text{CH}_3}$ ), 18.25 ( $\underline{\text{CH}_3}$ ). IR (KBr,  $\text{cm}^{-1}$ ): 3422 (NH str), 2966 ( $\text{CH}_3$  str), 2922 ( $\text{CH}_3$  str), 1689 (CO str), 1552 (Ar-C=C str), 1473, 1445 (C=N str), 1223 (C-S-C str), 1133, 758; HRMS (ESI): calcd for  $\text{C}_{17}\text{H}_{23}\text{N}_2\text{OS}$  ( $\text{M}+\text{H}$ ) $^+$ : 303.1531 found 303.1418.



***N*-(6-methyl-4-phenyl-6H-1,3-thiazin-2-yl)propanamide (9g)**

The compound **9g** was prepared according to general procedure by utilizing propionyl chloride **8g**. Brown color liquid; Yield: 85 %; **<sup>1</sup>H NMR** (400 MHz, CDCl<sub>3</sub>)  $\delta$ : 7.62–7.59 (m, 2H), 7.39–7.28 (m, 3H), 5.58 (d,  $J$  = 5.8 Hz, 1H), 3.86–3.70 (m, 1H), 2.49 (q,  $J$  = 7.5 Hz, 2H), 1.46 (d,  $J$  = 6.9 Hz, 3H), 1.20 (t,  $J$  = 7.5 Hz, 3H); **<sup>13</sup>C NMR** (100 MHz, CDCl<sub>3</sub>)  $\delta$  ppm: 175.12 (CO), 161.56 (C2), 145.73 (C6), 140.13 (ArC), 137.71 (ArC), 132.18 (ArC), 129.73 (ArC), 128.48 (ArC), 124.53 (ArC), 122.67 (C5), 38.10 ( $\underline{\text{CH}}_2$ ), 26.78 ( $\underline{\text{CH}}$ ), 24.40 ( $\underline{\text{CH}}_3$ ), 20.70 ( $\underline{\text{CH}}_3$ ). **IR** (KBr, cm<sup>-1</sup>): 3433 (NH str), 3159 (=CH str), 2977 (CH<sub>3</sub> str), 2929 (CH<sub>2</sub> str), 1731 (CO str), 1561, 1492 (Ar-C=C str), 1226 (C=N str), 1104 (C-S-C str); **HRMS** (ESI): calcd for C<sub>14</sub>H<sub>17</sub>N<sub>2</sub>OS (M+H)<sup>+</sup>: 261.1062 found 261.0999.

***N*-(6-Methyl-4-phenyl-6H-1,3-thiazin-2-yl)butyramide (9h)**

The compound **9h** was prepared according to general procedure by utilizing butyryl chloride **8h**. Brown colour liquid; Yield: 83 %; **<sup>1</sup>H NMR** (400 MHz, CDCl<sub>3</sub>)  $\delta$ : 7.62–7.59 (m, 2H), 7.39–7.28 (m, 3H), 5.58 (d,  $J$  = 5.8 Hz, 1H), 3.86–3.70 (m, 1H), 2.49 (q,  $J$  = 7.5 Hz, 2H), 1.46 (d,  $J$  = 6.9 Hz, 3H), 1.20 (t,  $J$  = 7.5 Hz, 3H); **<sup>13</sup>C NMR** (100 MHz, CDCl<sub>3</sub>)  $\delta$  ppm: 173.04 (CO), 169.00 (C2), 153.16 (C6), 142.34 (ArC), 142.12 (ArC), 130.17 (ArC), 129.60 (ArC), 128.09 (ArC), 124.98 (ArC), 124.72 (C5), 60.07 ( $\underline{\text{CH}}_2$ ), 42.17 (C4), 28.95 ( $\underline{\text{CH}}_3$ ), 22.02 ( $\underline{\text{CH}}_2$ ), 21.92 ( $\underline{\text{CH}}_3$ ). **IR** (KBr, cm<sup>-1</sup>): 3434 (NH str), 2962 (CH<sub>3</sub> str), 2925 (CH<sub>3</sub> str), 1698 (CO str), 1557 (Ar-C=C str), 1259 (C=N str), 1152 (C-S-C str); **HRMS** (ESI): calcd for C<sub>15</sub>H<sub>19</sub>N<sub>2</sub>OS (M+H)<sup>+</sup>: 275.1218 found 275.124.

***N*-(6-Methyl-4-phenyl-6H-1,3-thiazin-2-yl)benzamide (9i)**

The compound **9i** was prepared according to general procedure by utilizing benzoyl chloride **8i**. Off white solid; Yield: 85%; M.P: 91–95 °C.; **<sup>1</sup>H NMR** (400 MHz, CDCl<sub>3</sub>)  $\delta$ : 12.20 (brm 1H), 8.22–8.18 (m, 2H), 7.57–7.49 (m, 3H), 7.46–7.39 (m, 5H), 5.53 (d,  $J$  = 5.5 Hz, 1H), 4.00–3.89 (m, 1H), 1.62–1.49 (m, 6H); **<sup>13</sup>C NMR** (100 MHz, CDCl<sub>3</sub>)  $\delta$  ppm: 178.87 (CO), 168.90 (C2), 154.32 (C6), 142.54 (ArC), 142.34 (ArC), 140.71 (ArC), 128.82 (ArC), 128.54 (ArC), 128.50 (ArC), 128.35 (ArC), 126.66 (ArC), 126.64 (ArC), 124.92 (ArC), 124.46 (ArC), 124.09 (ArC), 122.88 (C5), 23.01 ( $\underline{\text{CH}}$ ), 21.53 ( $\underline{\text{CH}}_3$ ), **IR** (KBr, cm<sup>-1</sup>): 3435 (NH str), 3058 (=CH str), 2959

(CH<sub>3</sub> str), 1654 (CO str), 1598, 1538 (Ar-C=C str), 1370 (C=N str), 1275 (C-S-C str); **HRMS** (ESI): calcd for C<sub>18</sub>H<sub>17</sub>N<sub>2</sub>OS (M+H)<sup>+</sup>: 309.1062 found 309.1106.

***Methyl-6-methyl-4-phenyl-6H-1,3-thiazin-2-ylcarbamate (9j)***

The compound **9j** was prepared according to general procedure by utilizing methyl-chloroformate **8j**. Brown color liquid; Yield: 88 %; **<sup>1</sup>H NMR** (400 MHz, CDCl<sub>3</sub>)  $\delta$ : 7.52–7.49 (m, 2H, ArH), 7.40–7.38 (m, 4H, ArH), 5.45 (d,  $J$  = 5.5 Hz, 1H), 3.95–3.91 (m, 1H), 3.79 (s, 3H), 1.56 (d,  $J$  = 7.0 Hz, 3H); **<sup>13</sup>C NMR** (125 MHz, CDCl<sub>3</sub>)  $\delta$  ppm: 166.12 (C6), 162.45 (CO), 155.40 (ArC), 131.22 (ArC), 130.47 (ArC), 128.06 (ArC), 127.11 (ArC), 126.16 (ArC), 124.74 (ArC), 120.45 (C5), 45.12 (OCH<sub>3</sub>), 29.81 (C4), 25.46 (CH<sub>3</sub>); **IR** (KBr, cm<sup>-1</sup>): 3429 (NH str), 2978 (CH<sub>3</sub> str), 2928 (CH<sub>3</sub> str), 1732 (CO str), 1566, 1493 (Ar-C=C str), 1374 (C=N str), 1195 (C-S-C str), 1105 (C-O-C str); **HRMS** (ESI): calcd for C<sub>13</sub>H<sub>15</sub>N<sub>2</sub>O<sub>2</sub>S (M+H)<sup>+</sup>: 263.0854 found 263.0811.

***Ethyl-6-methyl-4-phenyl-6H-1,3-thiazin-2-ylcarbamate (9k)***

The compound **9k** was prepared according to general procedure by utilizing ethyl chloroformate **8k**. Brown color liquid; Yield: 90 %; **<sup>1</sup>H NMR** (400 MHz, CDCl<sub>3</sub>)  $\delta$ : 7.53–7.48 (m, 2H), 7.42–7.39 (m, 3H), 5.48 (d,  $J$  = 5.4 Hz, 1H), 4.20 (q,  $J$  = 7.1 Hz, 2H), 3.96 (brs, 1H), 1.56 (d,  $J$  = 7.0 Hz, 3H), 1.33 (t,  $J$  = 7.1 Hz, 3H); **<sup>13</sup>C NMR** (100 MHz, CDCl<sub>3</sub>)  $\delta$  ppm: 163.18 (C6), 158.12 (CO), 149.67 (ArC), 133.43 (ArC), 128.53 (ArC), 127.50 (ArC), 126.79 (ArC), 123.24 (ArC), 122.56 (ArC), 118.91 (C5), 45.39 (OCH<sub>2</sub>), 27.43 (C4), 24.60 (CH<sub>3</sub>), 21.07 (CH<sub>3</sub>); **IR** (KBr, cm<sup>-1</sup>): 3436 (NH str), 2924 (CH<sub>3</sub> str), 2853 (CH<sub>2</sub> str), 1725 (CO str), 1636, 1558 (Ar-C=C str), 1440 (C=N str), 1260 (C-S-C str); **LC-MS** (+ESI): calcd for C<sub>14</sub>H<sub>19</sub>N<sub>2</sub>O<sub>3</sub>S (M+H<sub>2</sub>O+H)<sup>+</sup>: 295.111; Found 295.2.

***Isopropyl-6-methyl-4-phenyl-6H-1,3-thiazin-2-ylcarbamate (9l)***

The compound **9l** was prepared according to general procedure by utilizing isopropyl chloroformate **8l**. Off white solid; Yield: 90 %; M.P: 122–125 °C; **<sup>1</sup>H NMR** (400 MHz, CDCl<sub>3</sub>)  $\delta$ : 7.53–7.48 (m, 2H), 7.42–7.39 (m, 3H), 5.48 (d,  $J$  = 5.6 Hz, 1H), 5.02–4.96 (q,  $J$  = 4.5 Hz, 1H), 3.88–3.77 (m, 1H), 1.56 (d,  $J$  = 7.0 Hz, 3H), 1.34 (d,  $J$  = 6.8 Hz, 6H); **<sup>13</sup>C NMR** (100 MHz, CDCl<sub>3</sub>)  $\delta$  ppm: 164.76 (C6), 159.14 (CO), 150.29 (ArC), 130.82 (ArC), 129.47 (ArC), 127.43 (ArC), 126.15 (ArC), 124.40 (ArC), 123.58 (ArC), 119.40 (C5), 48.37 (OCH), 28.42 (CH), 25.61 (CH<sub>3</sub>), 21.07 (CH<sub>3</sub>); **IR** (KBr, cm<sup>-1</sup>): 3435 (NH str), 3045 (=CH str), 2923 (CH<sub>3</sub> str), 2954 (CH

str), 1733 (CO str), 1558, 1486 (Ar-C=C str), 1445 (C=N str), 1220 (C-S-C str); **HRMS** (ESI): calcd for C<sub>15</sub>H<sub>19</sub>N<sub>2</sub>O<sub>2</sub>S (M+H)<sup>+</sup>: 291.1167 found 291.1308.

***Tert-butyl-6-methyl-4-phenyl-6H-1,3-thiazin-2-ylcarbamate (9m)***

The compound **9m** was prepared according to general procedure by utilizing tertbutyl chloroformate **8m**. Brown color liquid; Yield: 90 %; **<sup>1</sup>H NMR** (400 MHz, CDCl<sub>3</sub>)  $\delta$ : 7.53-7.48 (m, 2H), 7.42-7.39 (m, 3H), 5.48 (d,  $J$  = 5.6 Hz, 1H), 3.82-3.77 (m, 1H), 1.54-1.42 (m, 12H); **<sup>13</sup>C NMR** (100 MHz, CDCl<sub>3</sub>)  $\delta$  ppm: 166.97 (C2), 159.76 (C6), 151.10 (ArC), 131.48 (ArC), 129.19 (ArC), 127.49 (ArC), 126.25 (ArC), 124.89 (ArC), 121.78 (ArC), 119.89 (C5), 50.40 (OC(CH<sub>3</sub>)<sub>3</sub>), 30.18 (CH), 26.78 (CH<sub>3</sub>)<sub>3</sub>, 24.18 (CH<sub>3</sub>), 21.07 (CH<sub>3</sub>); **IR** (KBr, cm<sup>-1</sup>): 3436 (NH str), 3052 (=CH str), 2975 (CH<sub>3</sub> str), 2924 (CH str), 1731 (CO str), 1617, 1567, 1481 (Ar-C=C str), 1368 (=CN str), 1239 (C-S-C str), 755. **LC-MS** (ESI): calcd for C<sub>16</sub>H<sub>21</sub>N<sub>2</sub>O<sub>2</sub>S (M+H)<sup>+</sup>: 305.13 found 305.71

***N-(6-methyl-4-phenyl-6H-1,3-thiazin-2-yl)methanesulfonamide (9n)***

The compound **9n** was prepared according to general procedure utilizing methane sulfonyl chloride **8n** brown colour liquid. Yield: 82 %; **<sup>1</sup>H NMR** (400 MHz, CDCl<sub>3</sub>)  $\delta$ : 9.81 (brs, 1H), 7.47–7.26 (m, 5H), 5.69 (d,  $J$  = 5.2 Hz, 1H), 4.01-3.97 (m, 1H), 3.10 (s, 3H), 1.57 (d,  $J$  = 7.0 Hz, 3H); **<sup>13</sup>C NMR** (100 MHz, CDCl<sub>3</sub>)  $\delta$  ppm: 163.85 (C2), 154.49 (C6), 143.44 (ArC), 133.32 (ArC), 130.02 (ArC), 129.63 (ArC), 125.02 (ArC), 115.40 (C5), 113.54 (ArC), 30.02 (CH<sub>3</sub>), 25.81 (C4), 15.40 (CH<sub>3</sub>); **IR** (KBr, cm<sup>-1</sup>): 3402 (NH str), 3058 (=CH str), 2928 (CH<sub>3</sub> str), 1557, 1505 (Ar-C=C str), 1429 (C=N str), 1331 (C=N str), 1287 (C-S-C str); **Mass** (ESI): calcd for C<sub>12</sub>H<sub>15</sub>N<sub>2</sub>O<sub>2</sub>S<sub>2</sub> (M+H)<sup>+</sup>: 283.06; Found 283.0

***N-(6-Methyl-4-phenyl-6H-1,3-thiazin-2-yl)-4-(trifluoromethoxy)benzenesulfonamide (9o)***

The compound **9o** was prepared according to general procedure by utilizing 4-(trifluoromethoxy)benzene-1-sulfonyl chloride **8o**. Brown solid; **Yield**: 76 %; **<sup>1</sup>H NMR** (400 MHz, CDCl<sub>3</sub>)  $\delta$ : 9.77 (brs, 1H), 8.06–7.99 (m, 2H), 7.50–7.40 (m, 5H), 7.36–7.30 (m, 2H), 5.46 (d,  $J$  = 5.2 Hz, 1H), 3.97-3.86 (m, 1H), 1.54 (d,  $J$  = 7.0 3H); **<sup>13</sup>C NMR** (125 MHz, CDCl<sub>3</sub>)  $\delta$  ppm: 167.37 (C2), 162.81 (C6), 159.90 (ArC), 155.40 (ArC), 131.22 (ArC), 130.47 (ArC), 128.56 (ArC), 128.06 (ArC), 127.11 (ArC), 126.95 (ArC), 126.44 (ArC), 124.89 (ArC), 124.10 (ArC),

121.40 (C5), 29.84 (C4), 22.48 (CH<sub>3</sub>); **IR** (KBr, cm<sup>-1</sup>): 3434 (NH str), 3053 (=CH str), 2987 (CH<sub>3</sub> str), 2926 (CH str), 1552 (Ar-C=C str), 1258 (C=N str), 1151 (C-S-C str); **Mass** (ESI): calcd for C<sub>18</sub>H<sub>14</sub>N<sub>2</sub>O<sub>3</sub>S<sub>2</sub>F<sub>3</sub> (M-H)<sup>+</sup>: 427.04; Found 427.1

***1-(2-fluorophenyl)-3-(6-methyl-4-phenyl-6H-1,3-thiazin-2-yl)urea (9p)***

The compound **9p** was prepared according to general procedure by utilizing 2-fluoro phenyl isocyanate **8p**. Yield: 82 %; M.P: 81-83 °C; **<sup>1</sup>H NMR** (400 MHz, CDCl<sub>3</sub>)  $\delta$ : 11.32 (brs, 1H), 10.37 (brs, 1H), 8.19–8.17 (m, 1H), 7.62 (d, *J* = 8.0 Hz, 2H), 7.36 (d, *J* = 8.0 Hz, 3H), 7.26–7.10 (m, 3H), 5.79 (d, *J* = 4.0 Hz, 1H), 3.97–3.95 (m, 1H), 1.38 (m, 3H); **<sup>13</sup>C NMR** (100 MHz, CDCl<sub>3</sub>)  $\delta$  ppm: 166.03 (C2), 162.59 (CO), 158.83 (ArC), 151.21 (ArC), 148.53 (C6), 141.83 (ArC), 140.20 (ArC), 139.92 (ArC), 132.70 (ArC), 128.68 (ArC), 128.27 (ArC), 120.00 (C5), 113.26 (ArC), 21.57 (C4), 20.49 (CH<sub>3</sub>); **IR** (KBr, cm<sup>-1</sup>): 3459 (NH str), 3084 (=CH str), 2964 (CH<sub>3</sub> str), 1684, 1547 (Ar-C=C str), 1254 (C=N str), 1162 (C-S-C str). **Mass** (ESI): calcd for C<sub>18</sub>H<sub>16</sub>N<sub>3</sub>OSF (M)<sup>+</sup>: 341.10; Found 341.0.

***1-(2-chlorophenyl)-3-(6-methyl-4-phenyl-6H-1,3-thiazin-2-yl)urea (9q)***

The compound **9q** was prepared according to general procedure by utilizing 2-chloro phenyl isocyanate **8q**. Yield: 82 %; M.P: 81-83 °C; **<sup>1</sup>H NMR** (400 MHz, CDCl<sub>3</sub>)  $\delta$ : 11.79 (brs, 1H), 10.80 (brs, 1H), 7.66–7.35 (m, 9H), 5.63 (d, *J* = 4.0 Hz, 1H), 3.97–3.95 (m, 1H), 1.38 (m, 3H). **<sup>13</sup>C NMR** (125 MHz, CDCl<sub>3</sub>)  $\delta$  ppm: 195.81 (CO), 153.51 (C2), 144.57 (C6), 144.33 (ArC), 140.79 (ArC), 138.07 (ArC), 137.29 (ArC), 136.42 (ArC), 133.03 (ArC), 132.45 (ArC), 130.42 (ArC), 130.23 (ArC), 129.45 (ArC), 128.69 (ArC), 127.93 (C5), 29.84 (C4), 21.93 (CH<sub>3</sub>); **IR** (KBr, cm<sup>-1</sup>): 3434 (NH str), 3072 (=CH str), 2926 (CH<sub>3</sub> str), 1552 (Ar-C=C str), 1258 (C=N str), 1151 (C-S-C str); **LC-MS** (ESI): calcd for C<sub>18</sub>H<sub>17</sub>N<sub>3</sub>OSCl (M+H)<sup>+</sup>: 358.08; Found 358.0.

***Invitro MTB screening***

All the synthesized compounds were dissolved in 100% DMSO and stored as frozen stocks at concentrations of 50, 25, 12.5, 6.25, 3.13, 1.56, and 0.78  $\mu$ g/mL using Middle-brook 7H11 agar medium. Inoculum was prepared by inoculating frozen stocks into 10 ml 7H11 mycobacterial culture medium supplemented with Oleic Albumin Dextrose Catalase (OADC) (1%) final concentration, and 0.05% Tween 80 For growth evaluation in the (MGIT) 960 instrument was

used. Mycobacterial growth is monitored through changes in oxygen consumption which in turn changes fluorescence. Serially two-fold diluted compounds (0.1 ml in DMSO) were added to the 7H11 culture medium contained in Mycobacteria Growth Inhibition Tube (MGIT) tube with the final DMSO concentration not exceeding 1.2 %. 5  $\mu$ L of this bacterial suspension was spotted onto 7H11 agar tubes containing different concentrations of the drug as discussed above. The tubes were incubated at 37 °C, and final readings (as MIC in  $\mu$ g/mL) were determined after 28 days.

### **Cytotoxicity**

*Invitro* anti-cancer activity of the test compounds was tested using MTT colorimetric assay as per ATCC protocol.<sup>4,5</sup> Cell lines used in the present includes MCF-7 derived from human breast cancer cell line cells (ATCC No. HTB-28), EC-9706 derived from human esophageal cancer cell lines (ATCC No. HTB-39) which were procured from American Type Culture Collection, Manassas, VA, USA. Cisplatin was used as the standard drug in the assay. MCF-7 supplemented with 10 % new born calf serum (NBCS), 100 IU/mL penicillin, 100 mg/ml streptomycin and 2 mM-glutamine. Cell lines were maintained at 37 °C in a humidified 5 % CO<sub>2</sub> incubator (Thermo scientific). EC-9706 was maintained in DMEM medium supplemented with 10 % new born calf serum, along with 1 % non-essential amino acids, 0.2 % sodium bicarbonate, 1 % sodium pyruvate and 1 % antibiotic mixture (10, 000 U penicillin and 10 mg streptomycin per mL). Cell lines were processed by initial trypsinization to detach the adhered cells and followed by centrifugation to get cell pellet. Fresh media was added to the pellet to make a cell count using haemocytometer and plate 100  $\mu$ L of media with cells ranging from 5,000-6,000 per well in a 96-well plate. The plate was incubated overnight in CO<sub>2</sub> incubator for the cells to adhere and regain its shape. After 24 h cells were treated with the test compounds at 25  $\mu$ M diluted using the media to deduce the percentage inhibition on cancer cells and human normal cells. The cells were incubated for 48 h to assay the effect of the test compounds on different cell lines. Zero hour reading was noted down with untreated cells and also control with 1 % DMSO to subtract further from the 48hr reading. After 48 h incubation, cells were treated by MTT (4,5-dimethylthiazol-2-yl)-2,5-diphenyltetrazolium bromide) dissolved in PBS (5 mg/ml) and incubated for 3-4 hr at 37 °C. The formazan crystals thus formed were dissolved in 100  $\mu$ L of DMSO and the viability was measured at 540 nm on a multimode reader (spectra max).

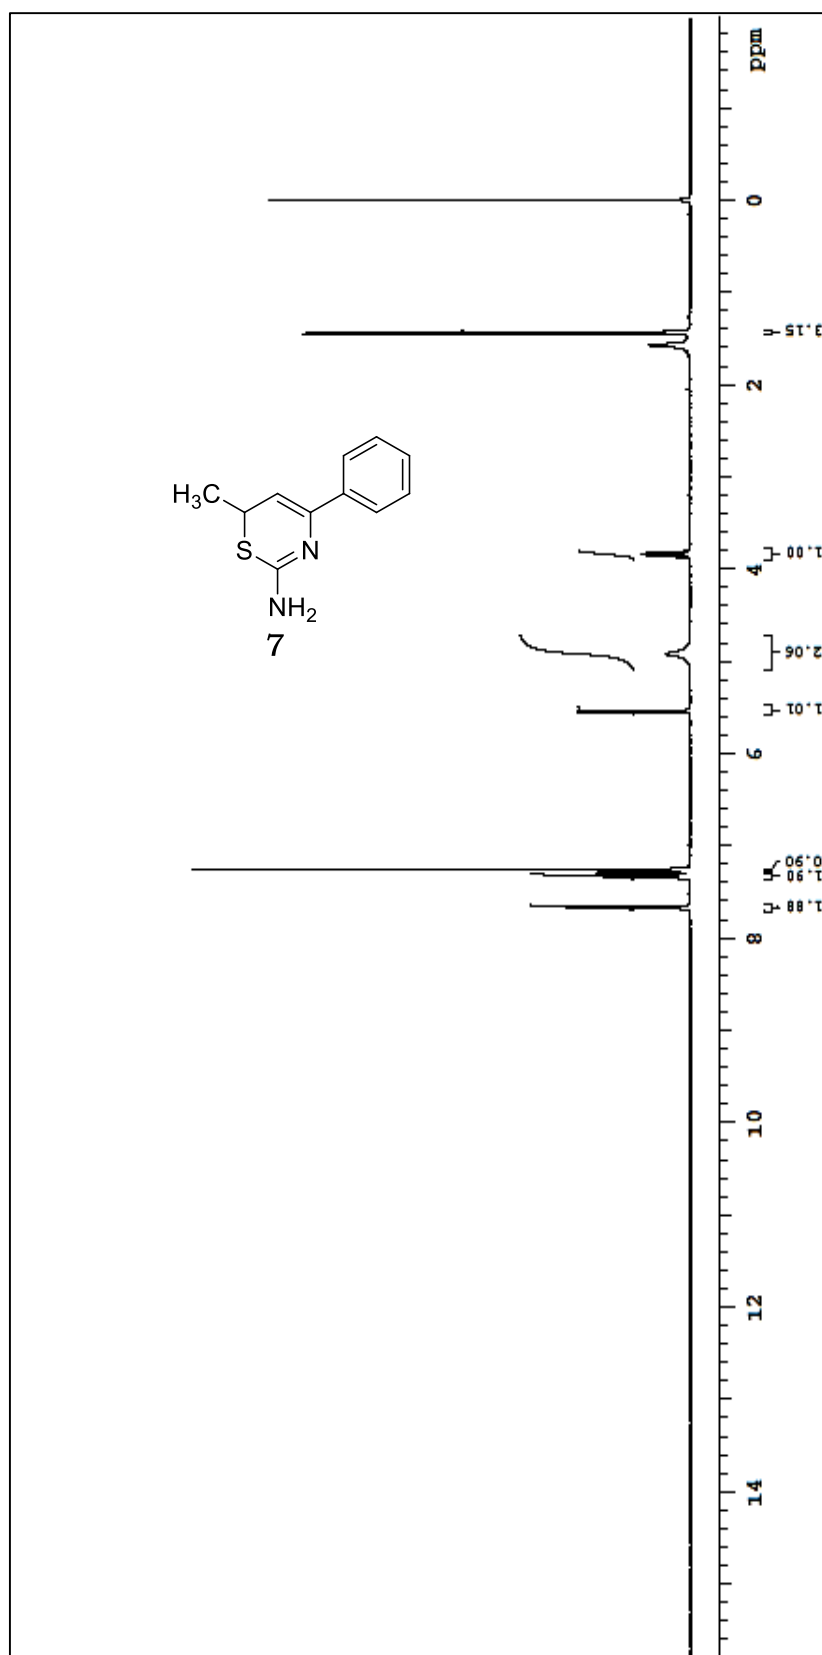

<sup>1</sup>H NMR spectrum of compound 7

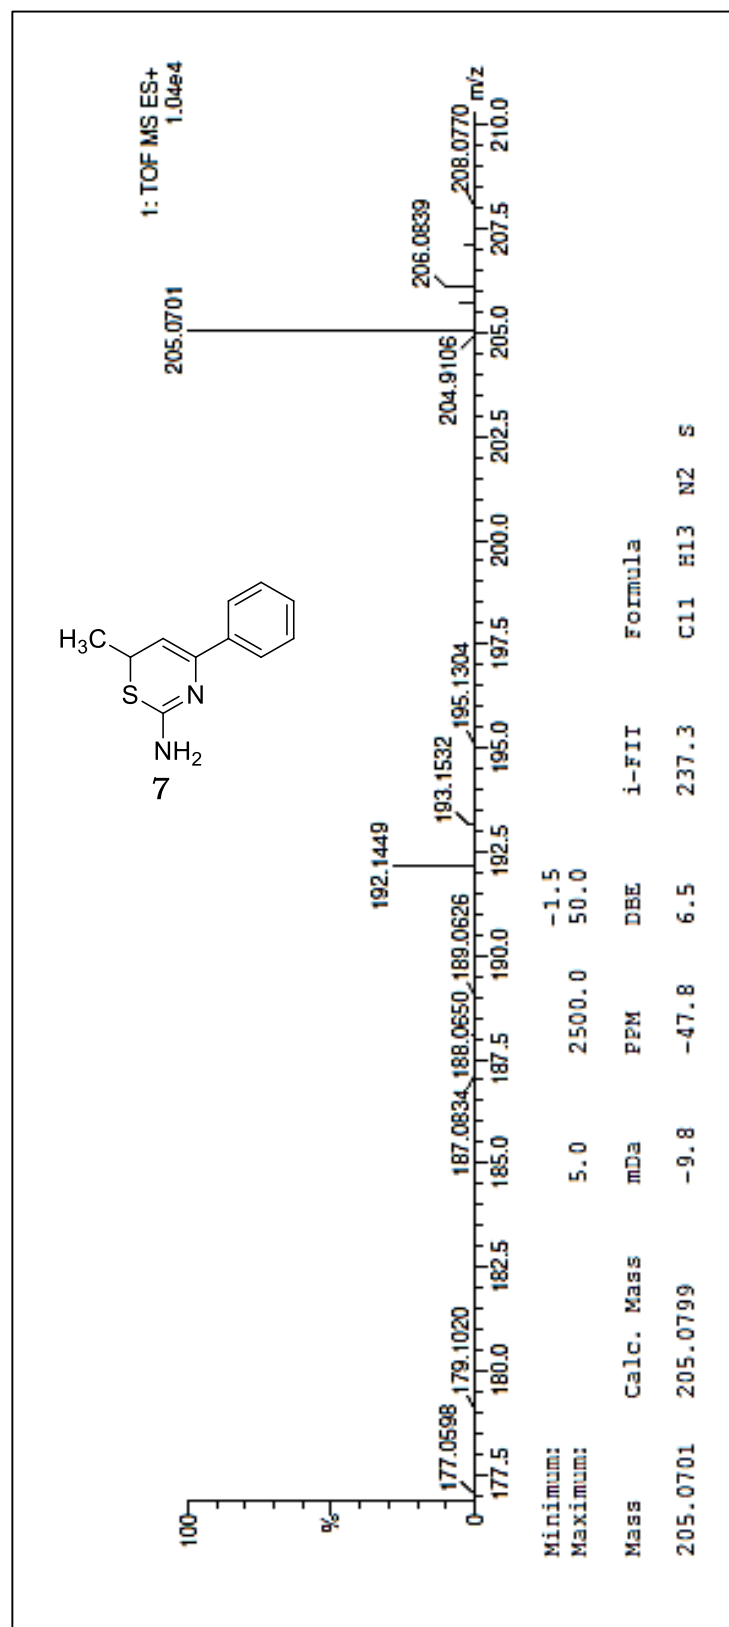

HRMS spectrum of compound 7

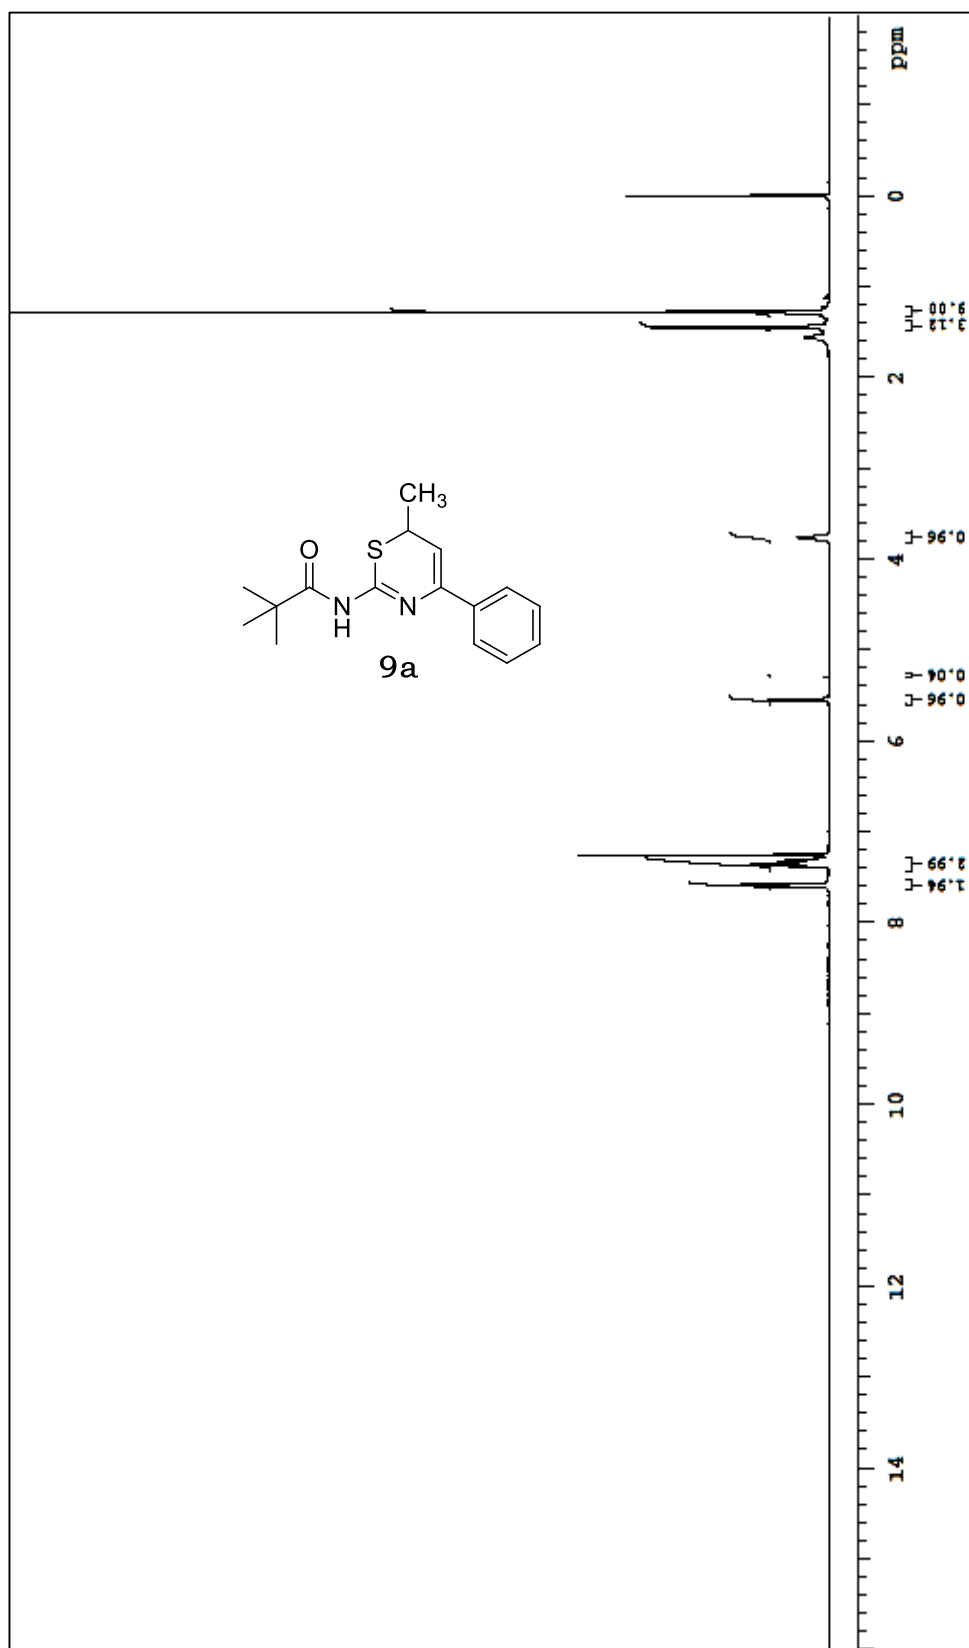

<sup>1</sup>H NMR spectrum of compound 9a



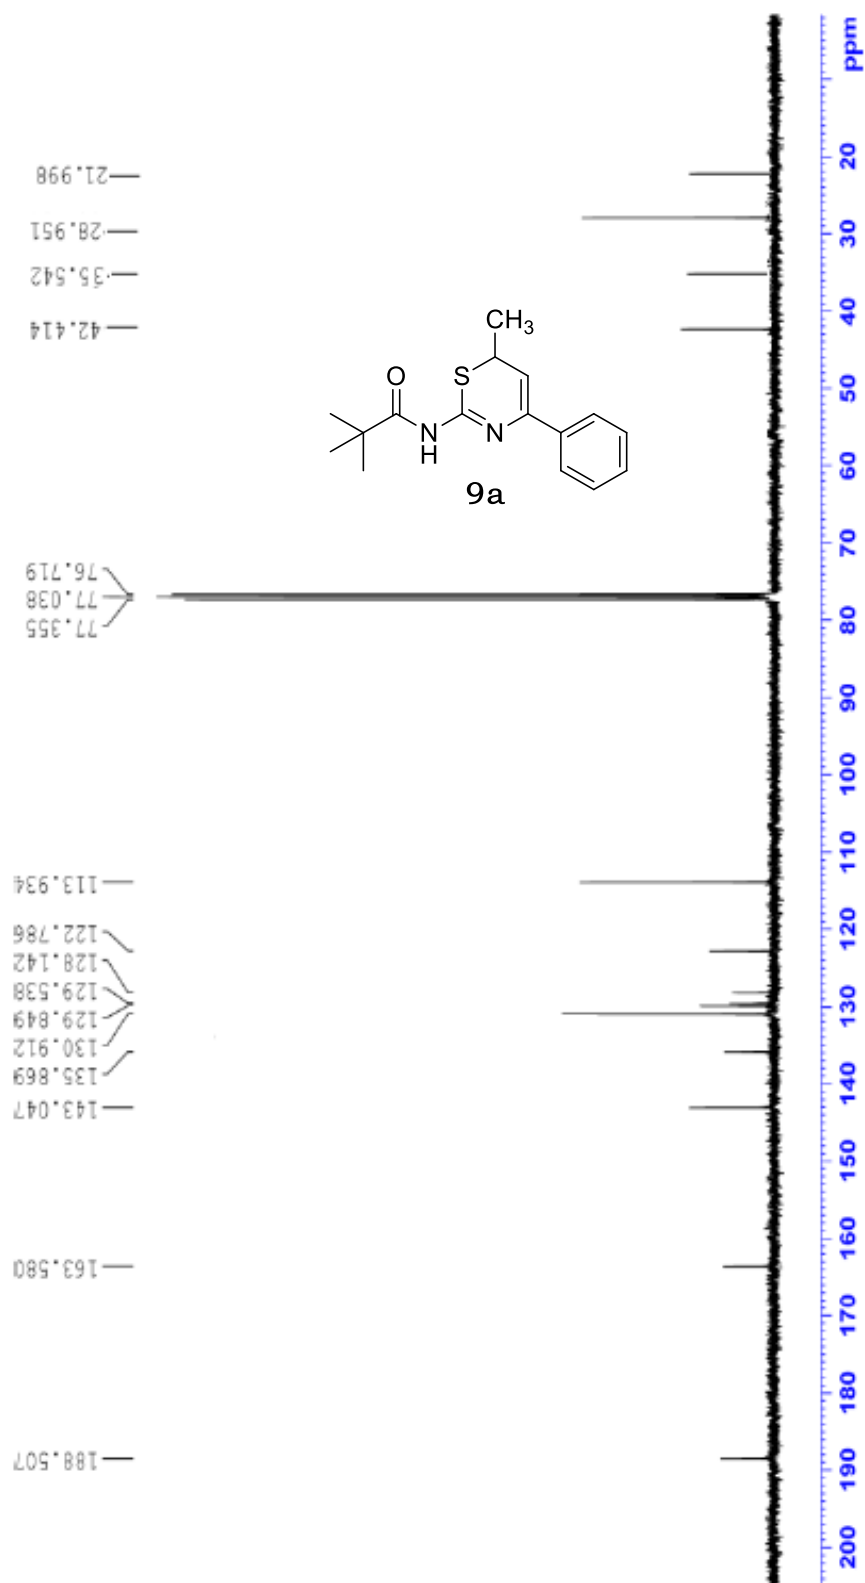

<sup>13</sup>C NMR spectrum of compound 9a

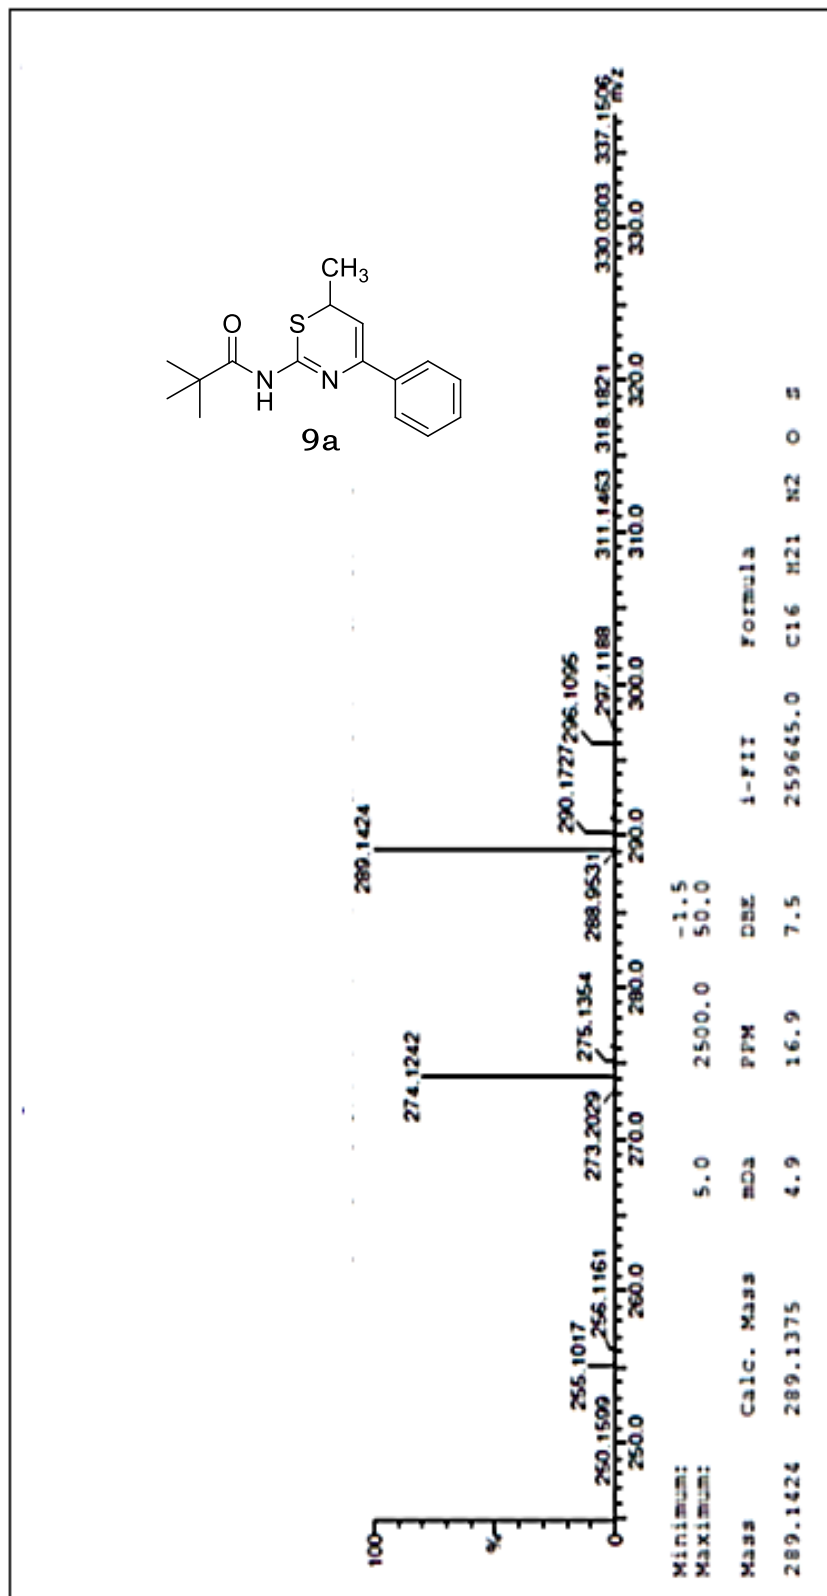

HRMS spectrum of compound 9a

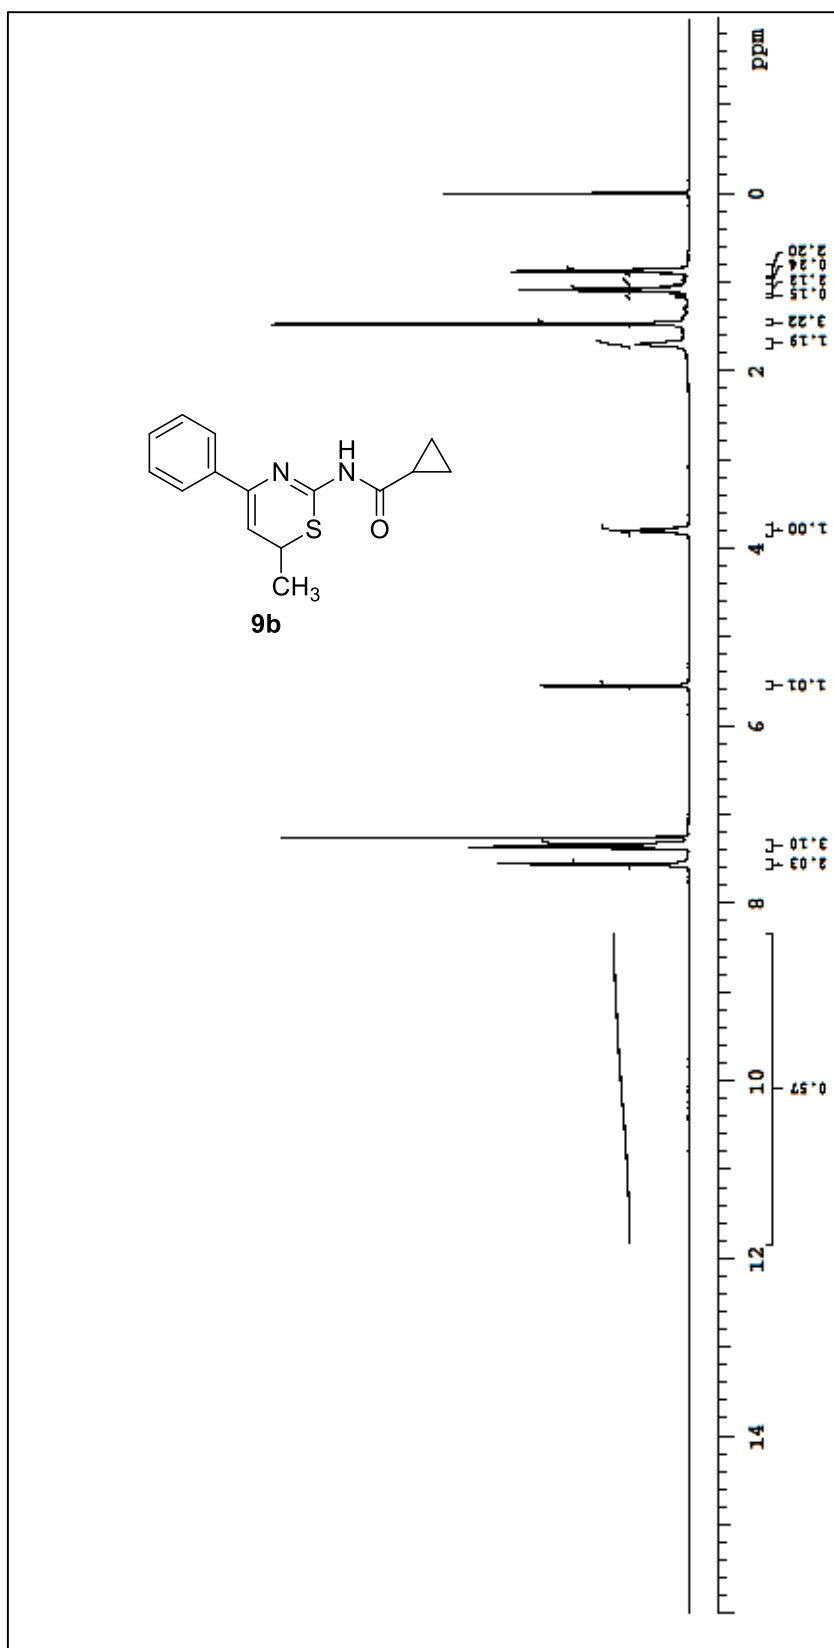

<sup>1</sup>H NMR spectrum of compound **9b**

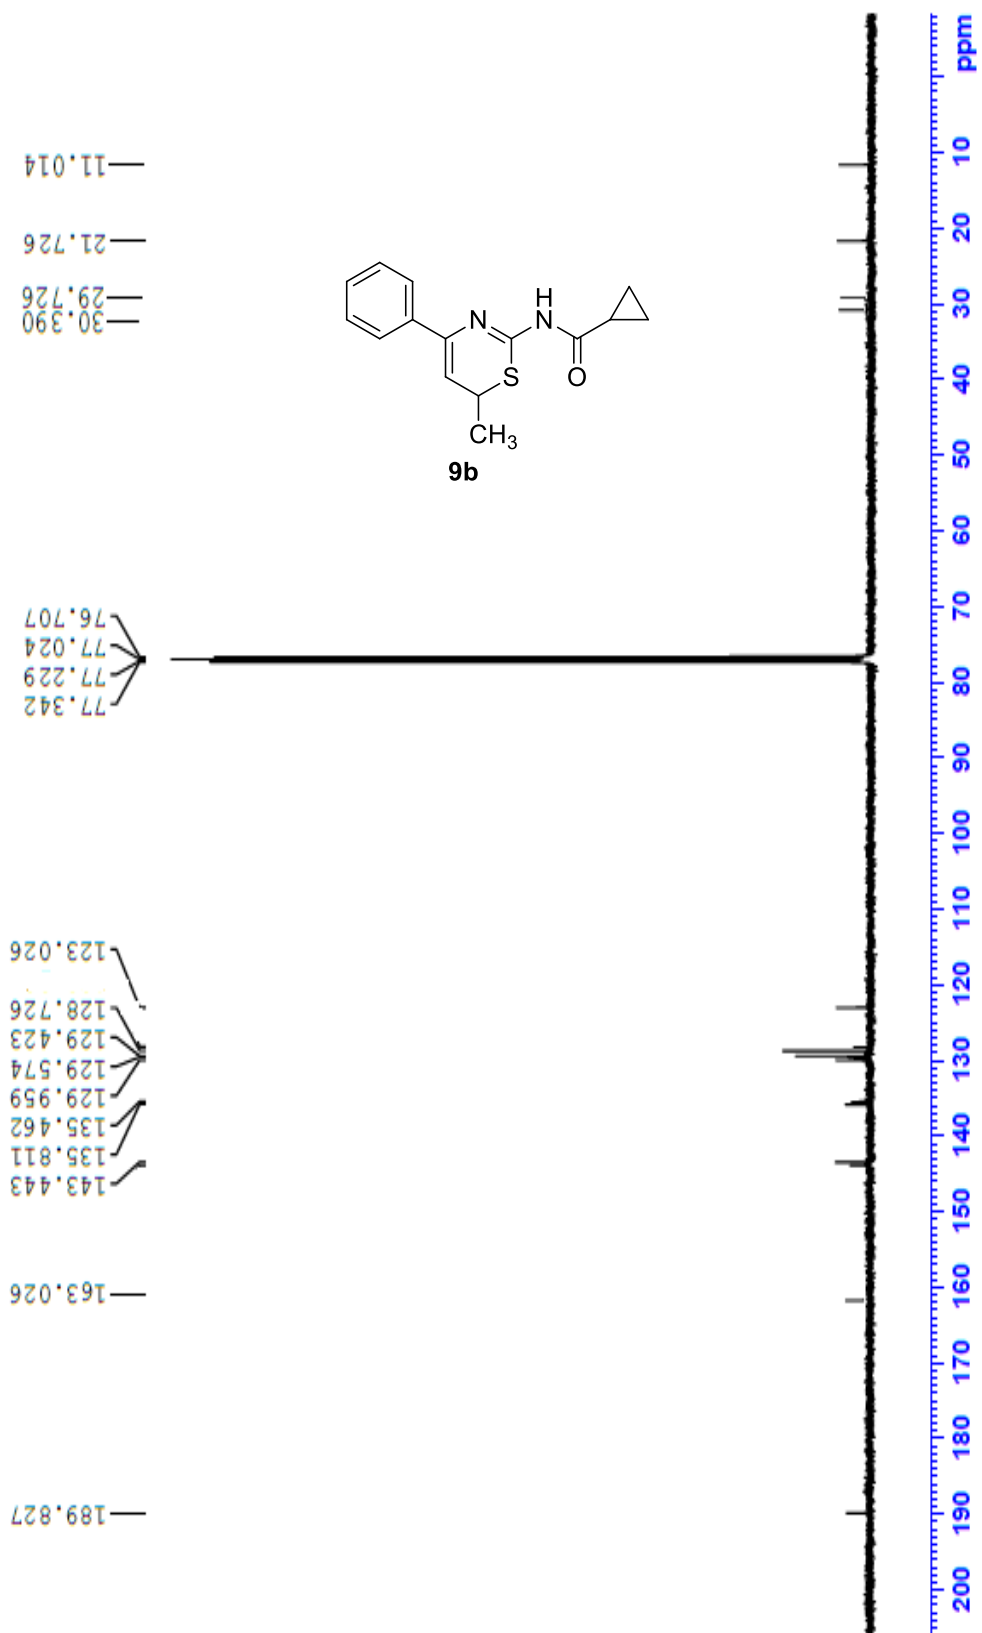

<sup>13</sup>C NMR spectrum of compound 9b

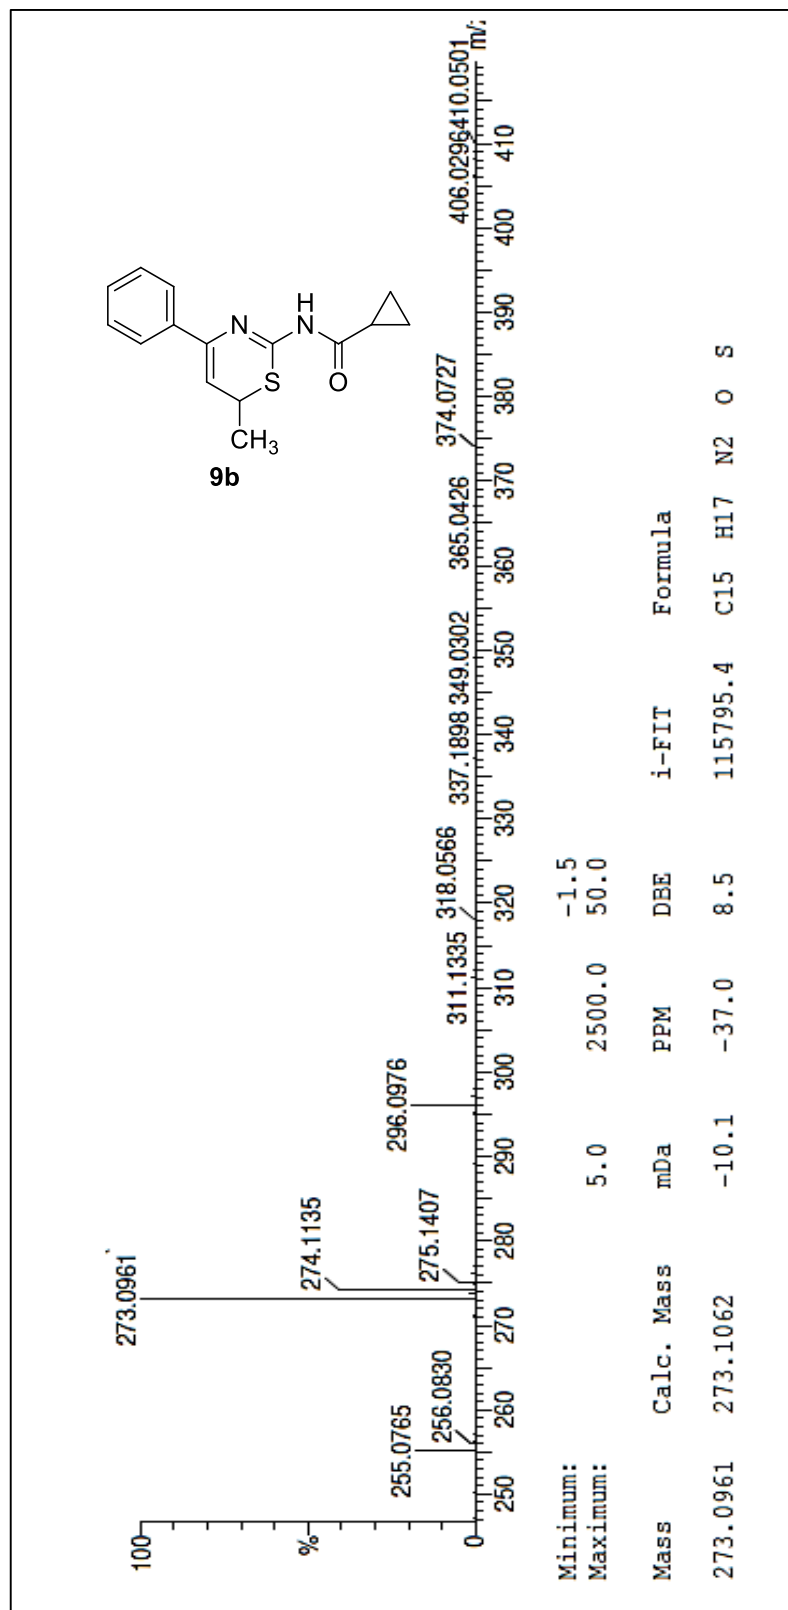

HRMS spectrum of compound 9b

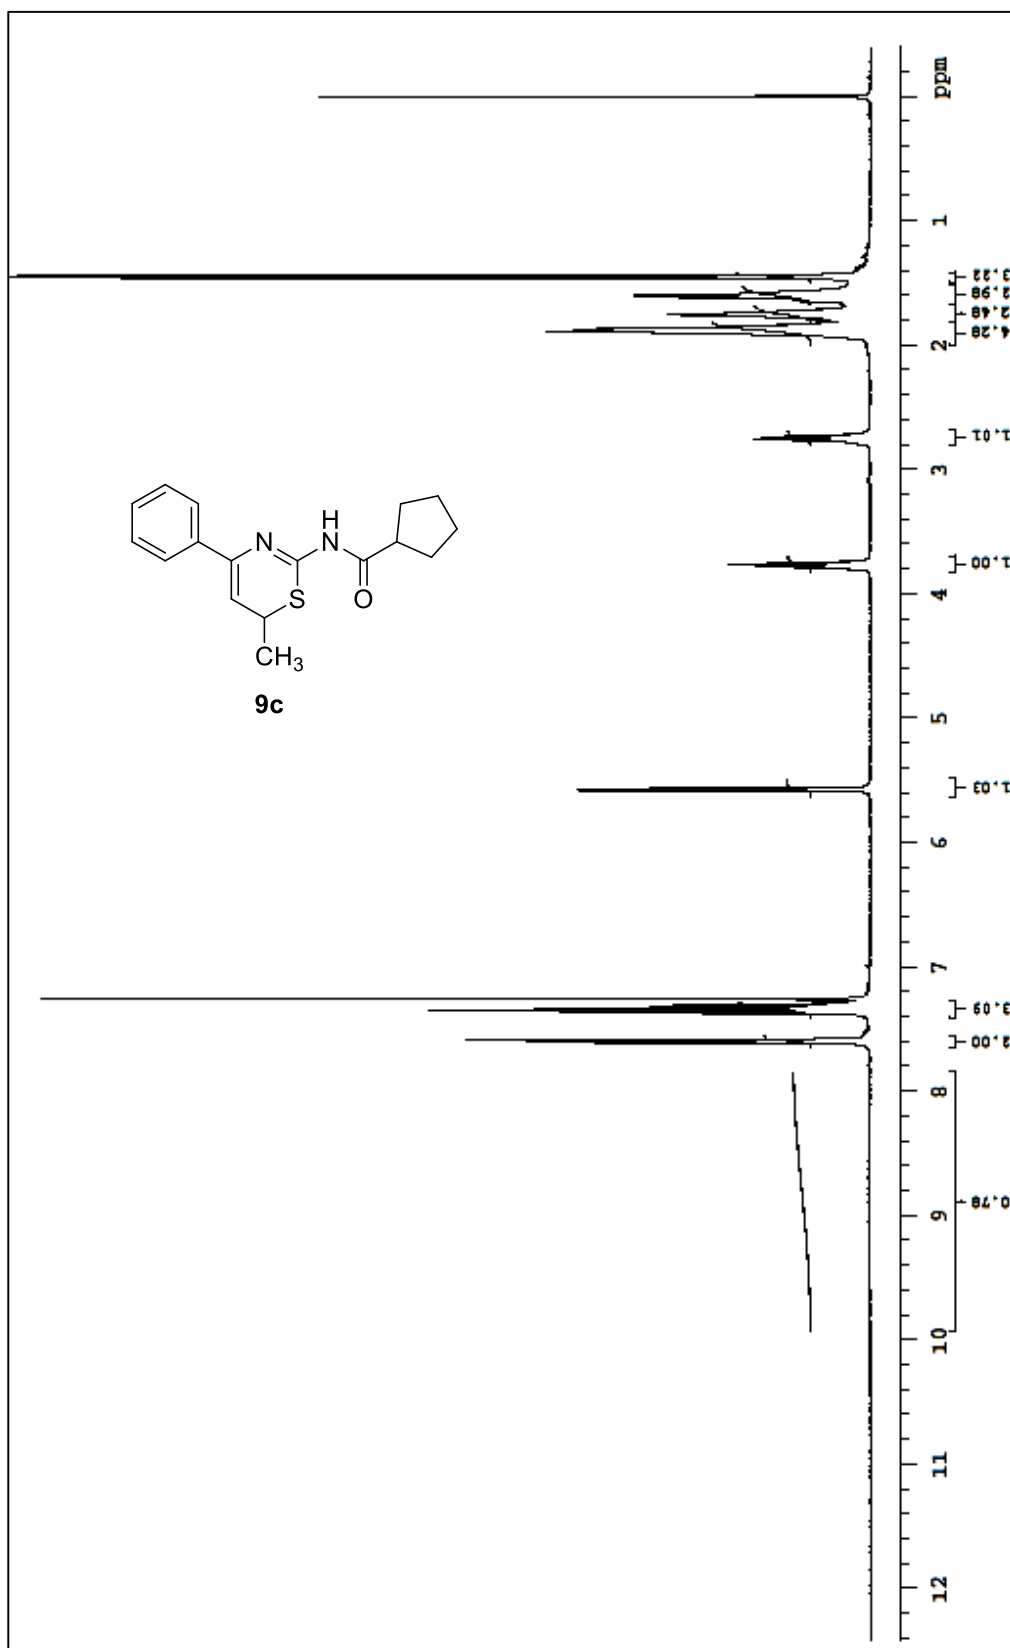

<sup>1</sup>H NMR spectrum of compound **9c**

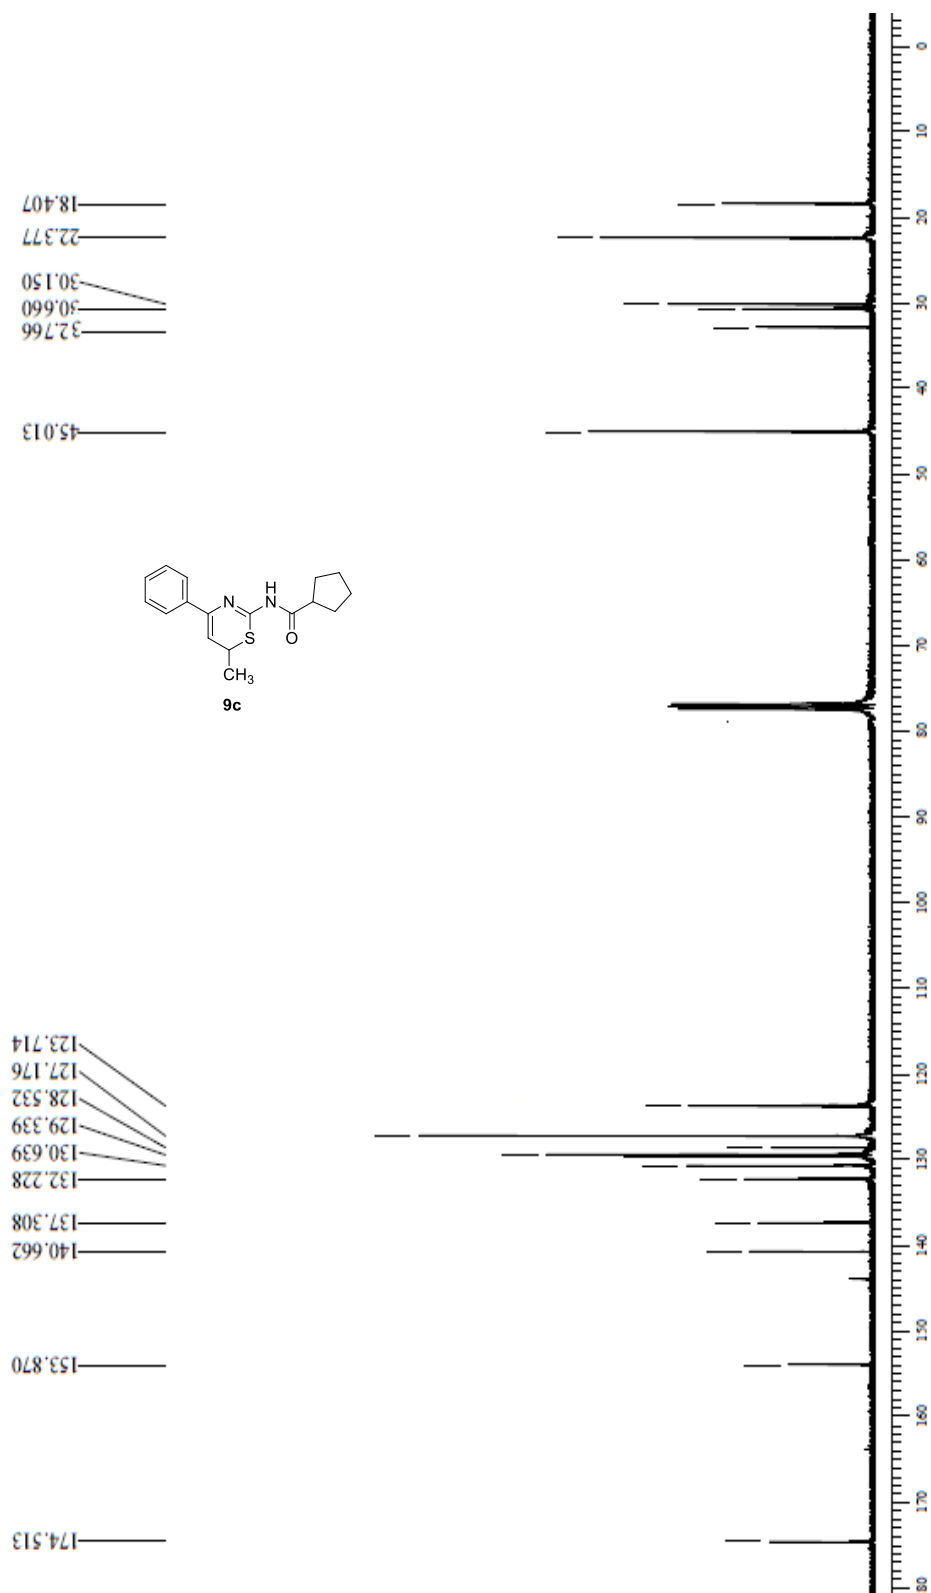

<sup>13</sup>C NMR spectrum of **9c**

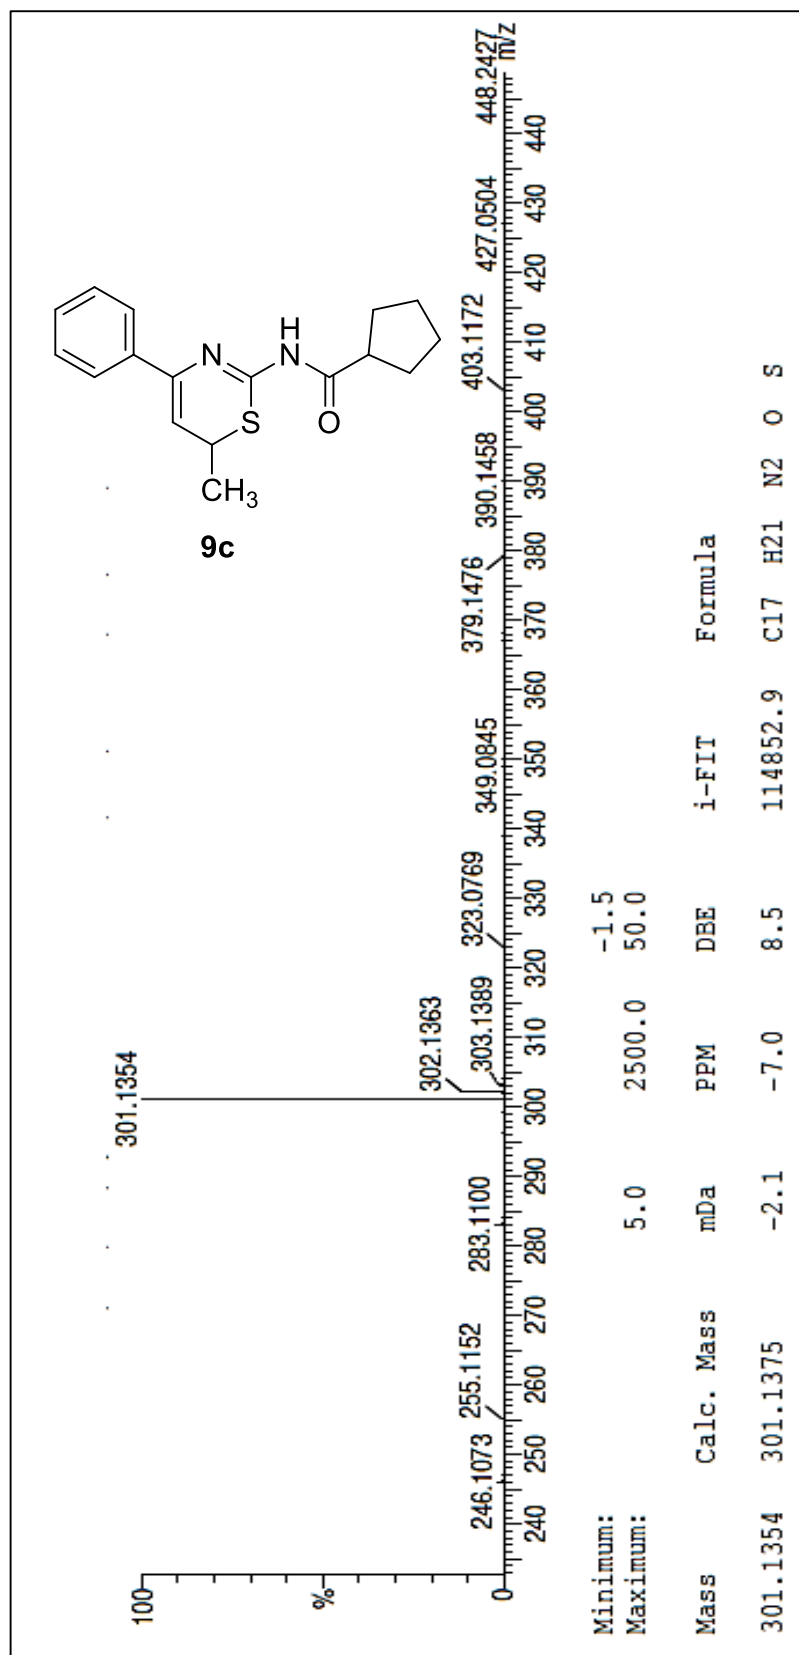

HRMS spectrum of compound 9c



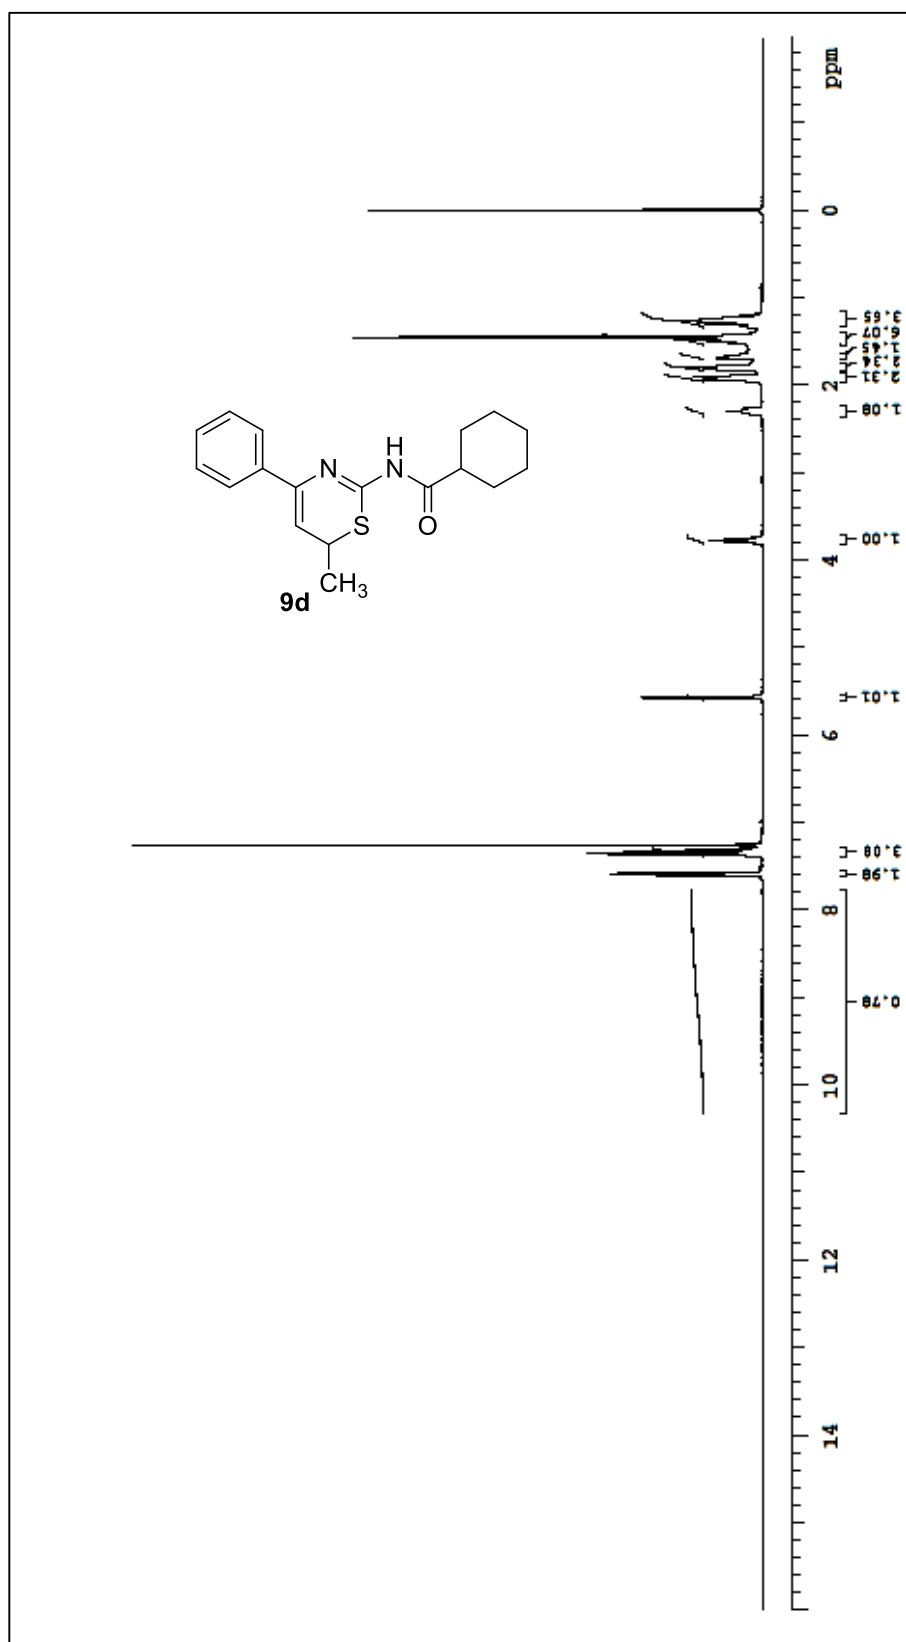

<sup>1</sup>H NMR spectrum of compound 9d

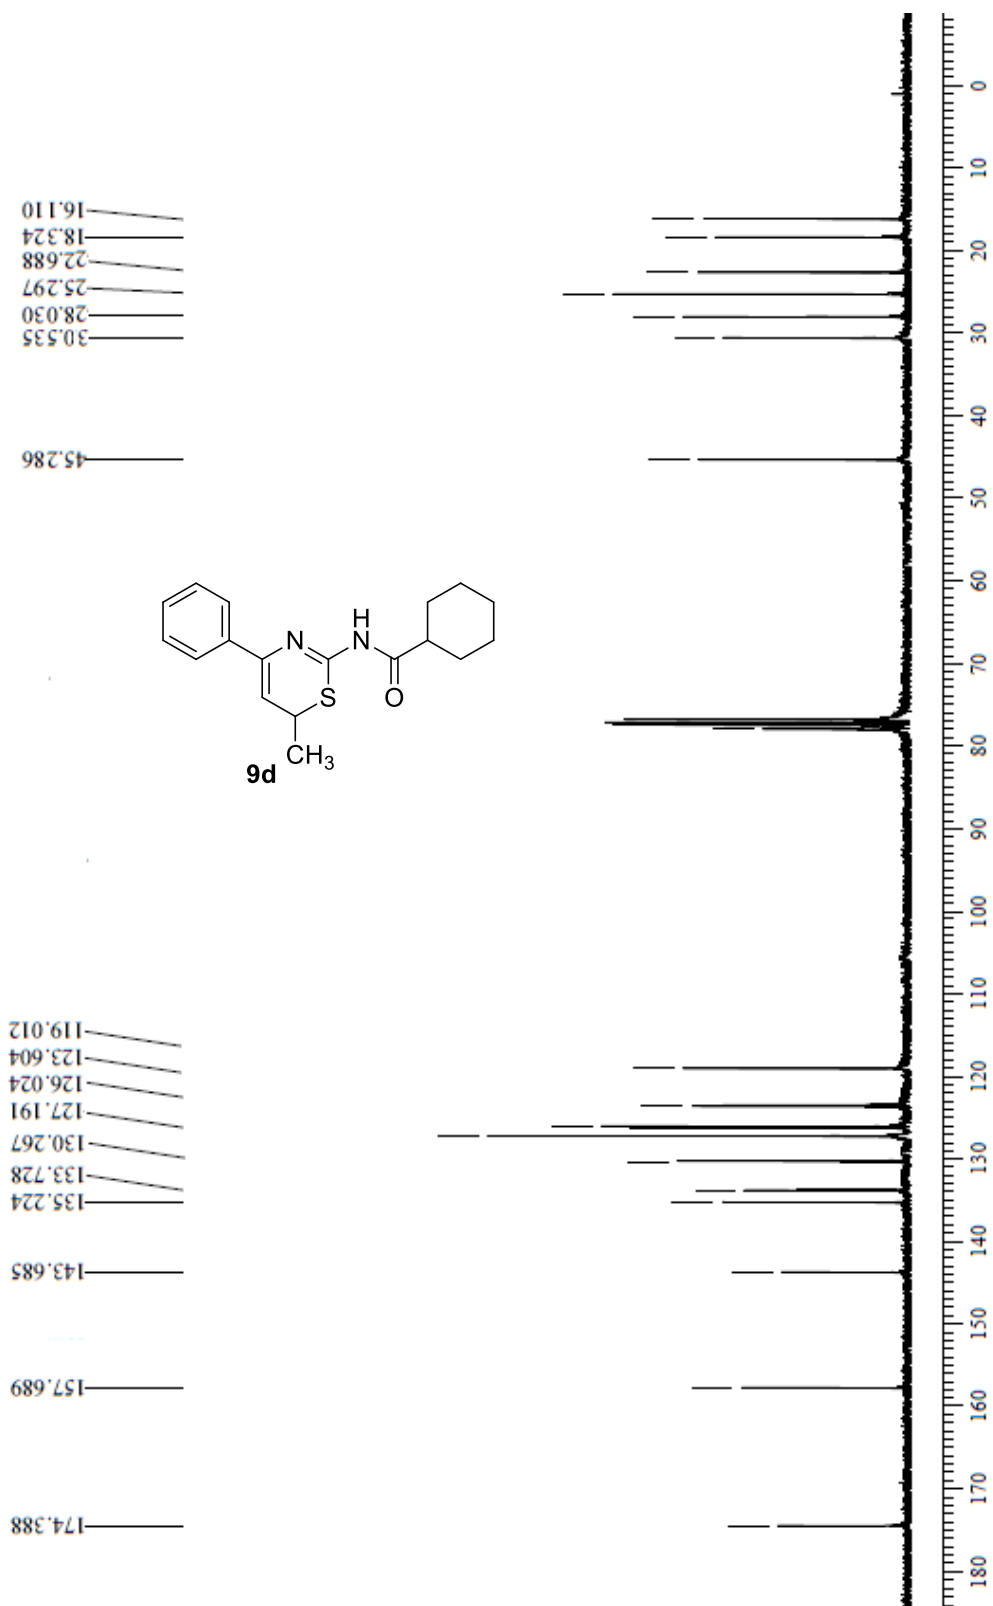

<sup>13</sup>C NMR spectrum of compound 9d

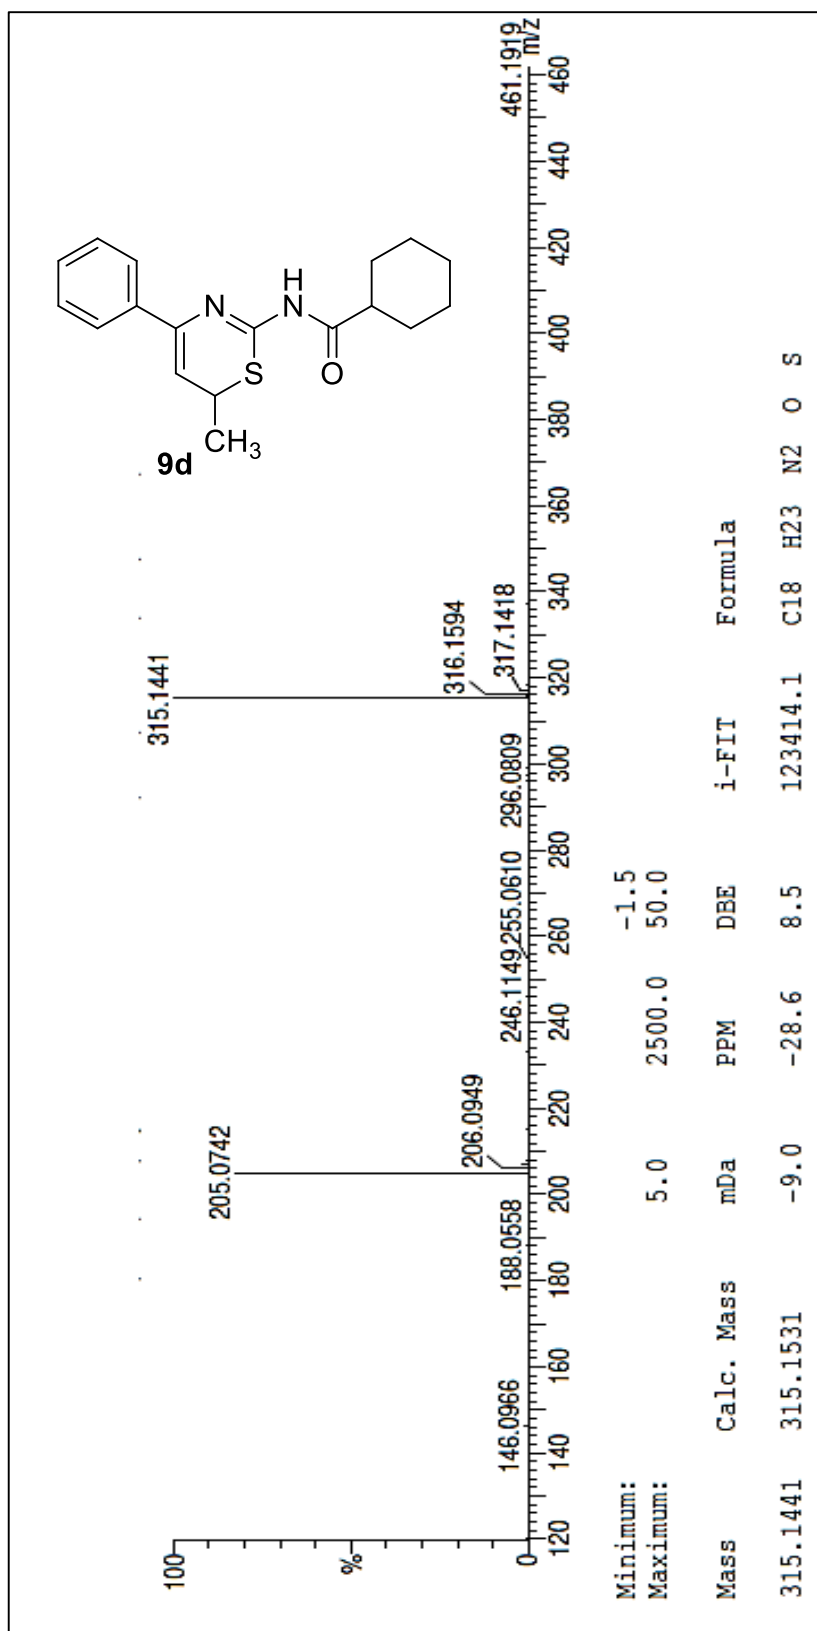

HRMS spectrum of compound 9d

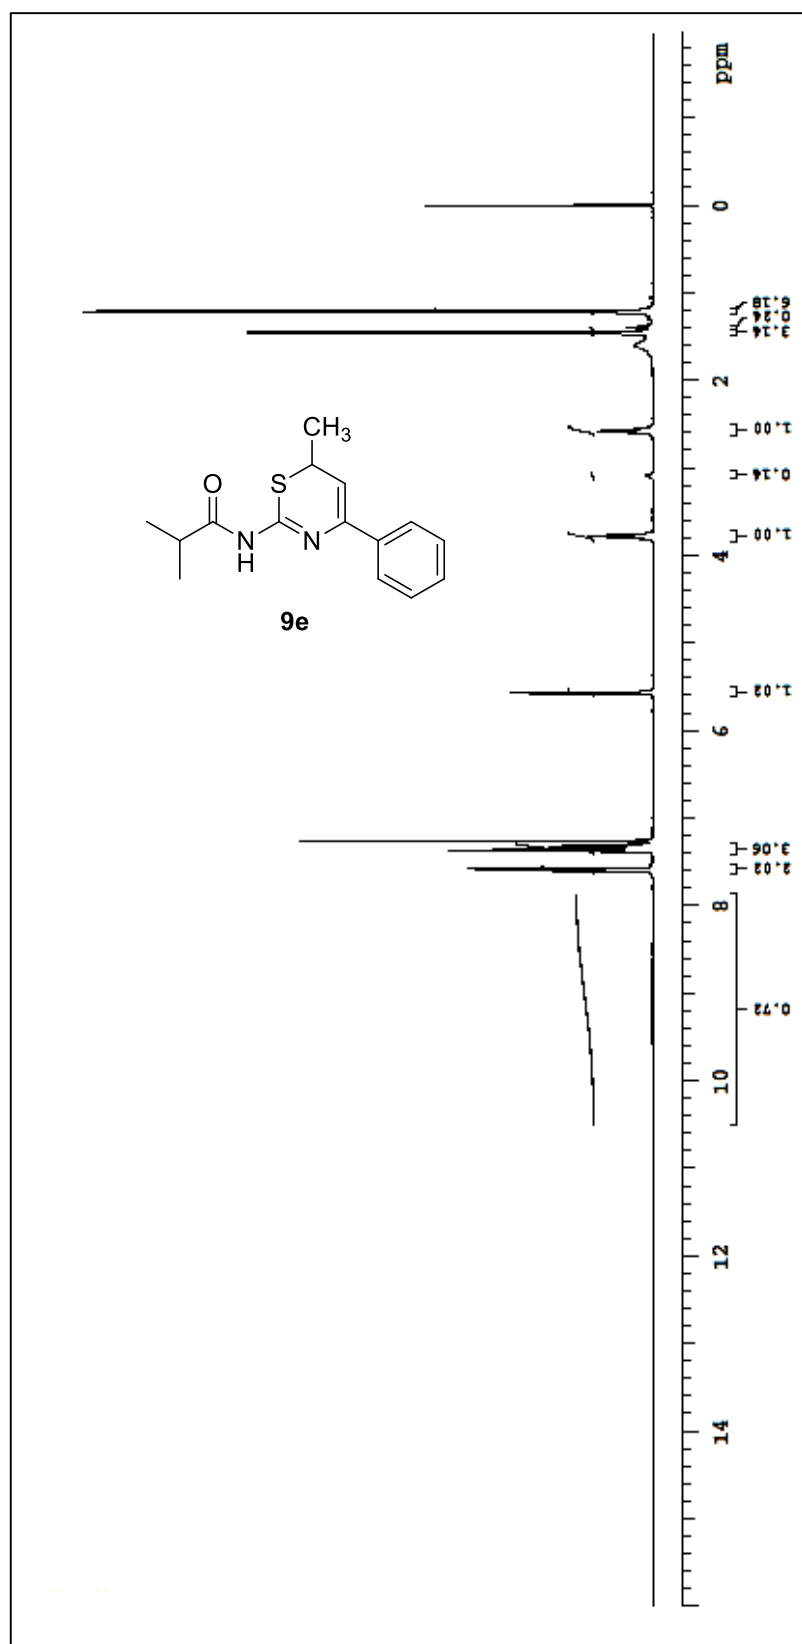

**<sup>1</sup>H NMR Spectrum of compound 9e**

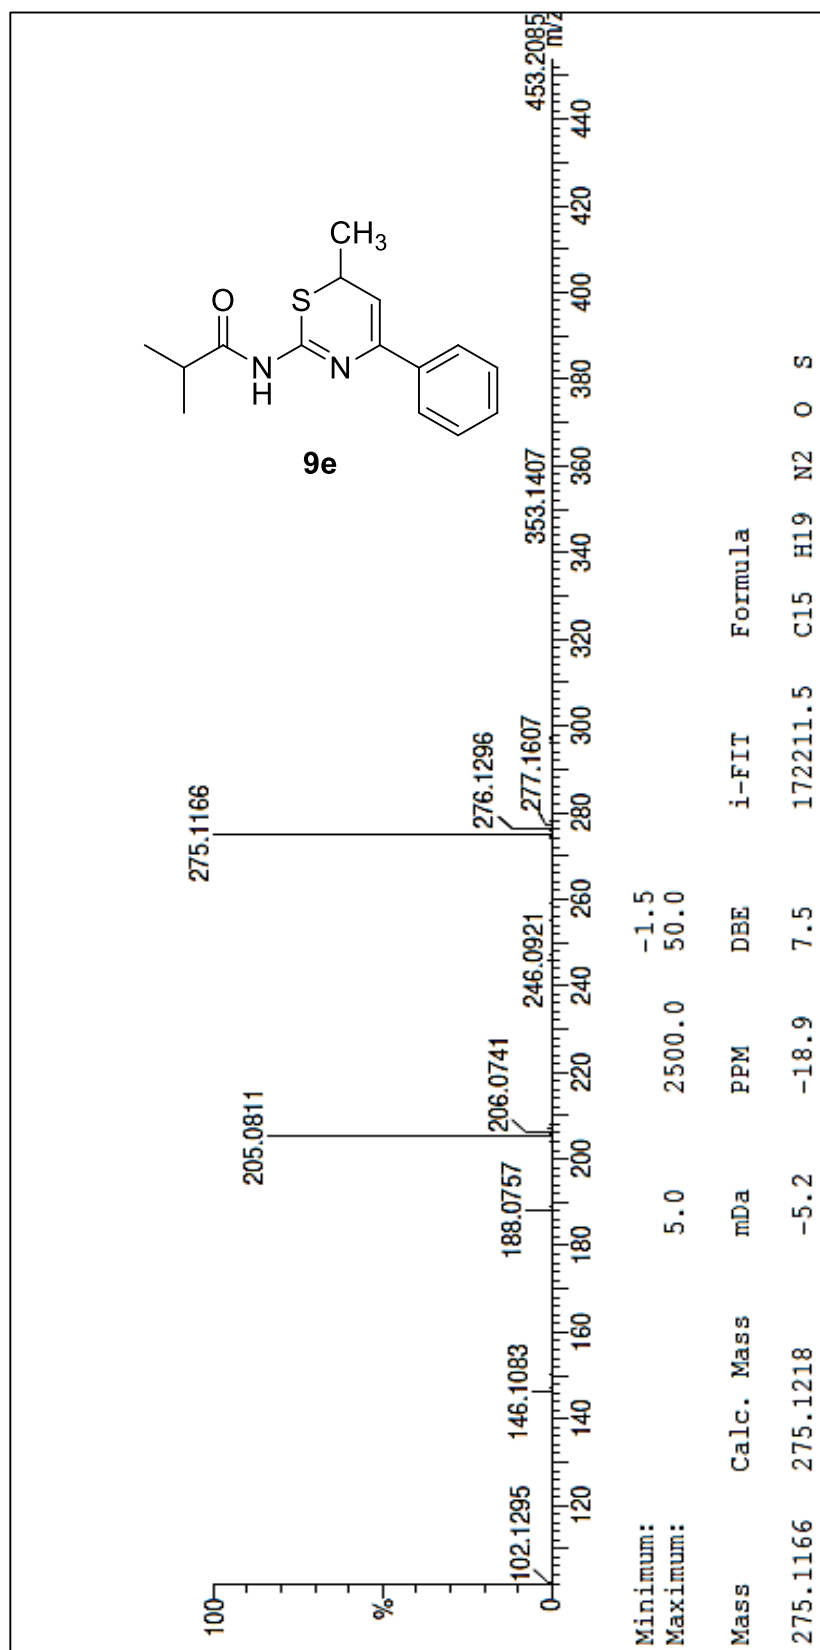

HRMS spectrum of compound 9e

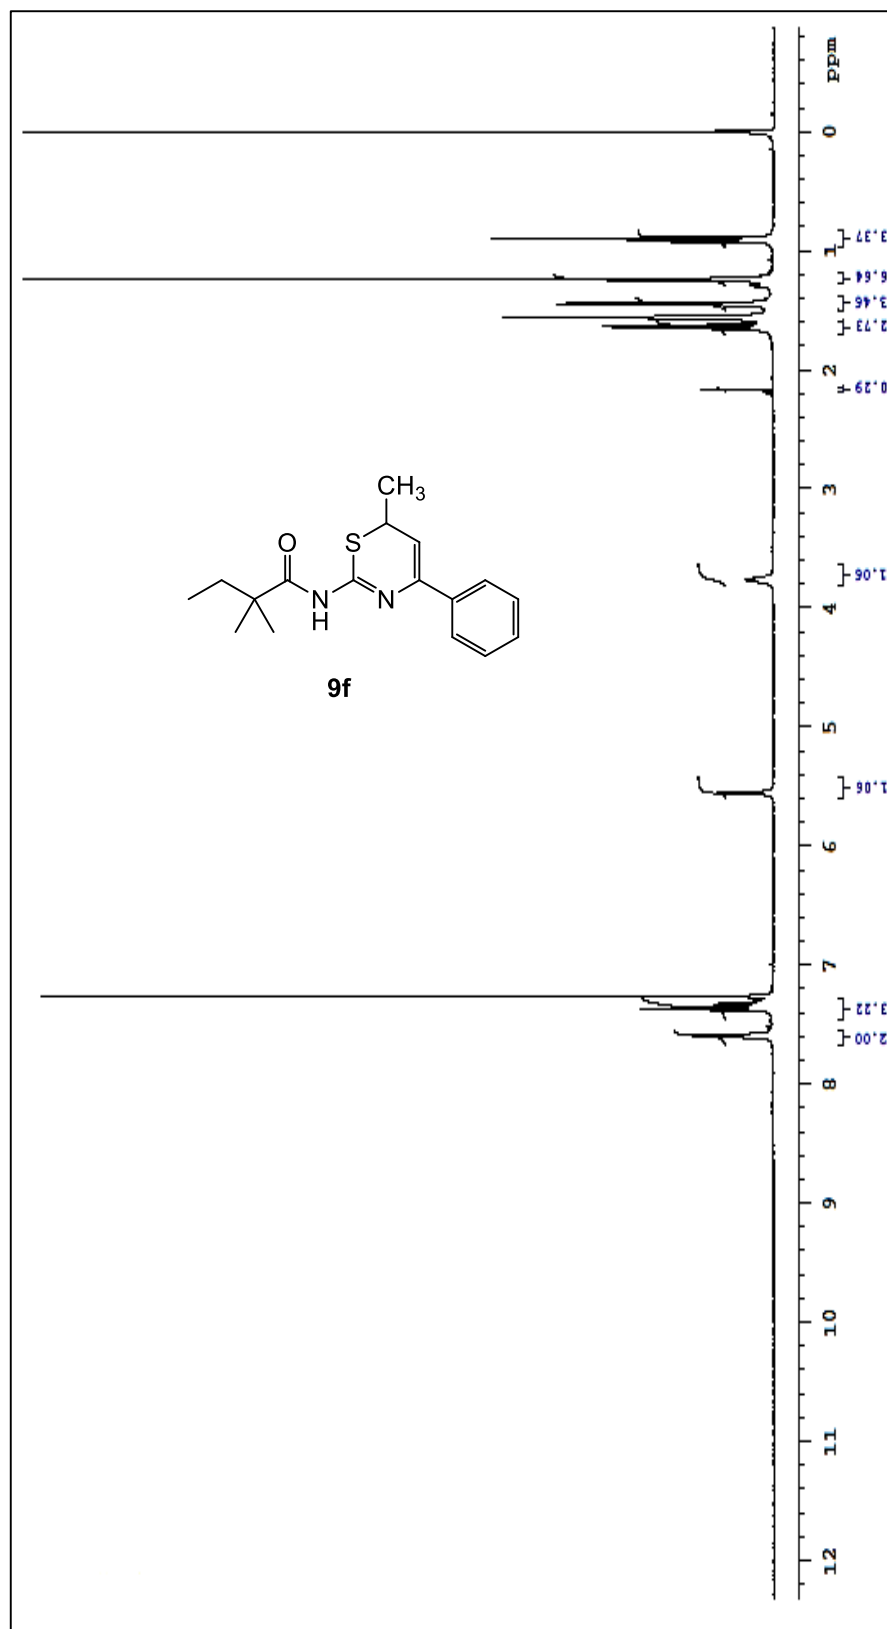

<sup>1</sup>H NMR spectrum of compound 9f

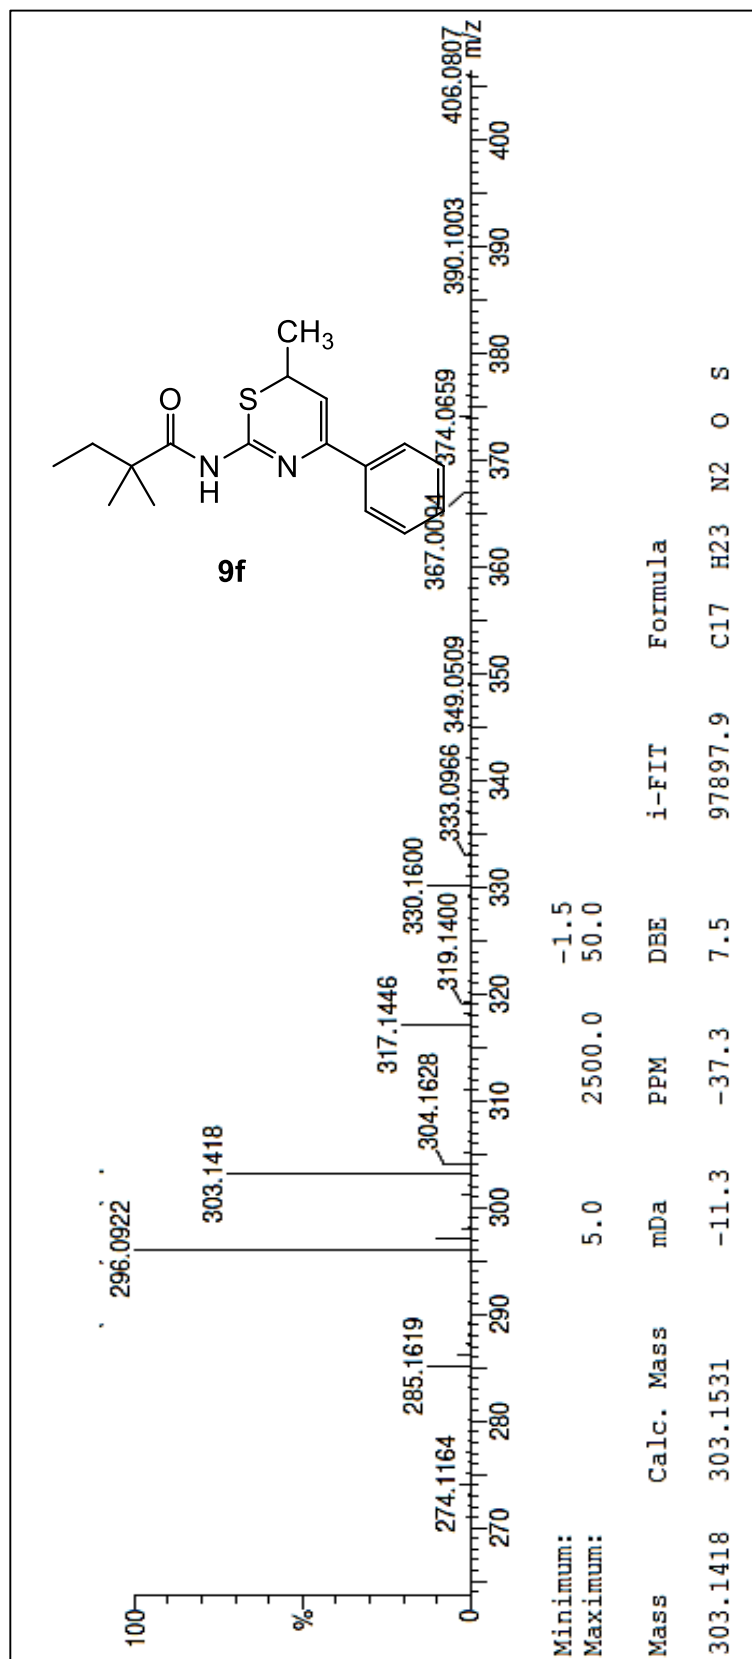

HRMS spectrum compound 9f

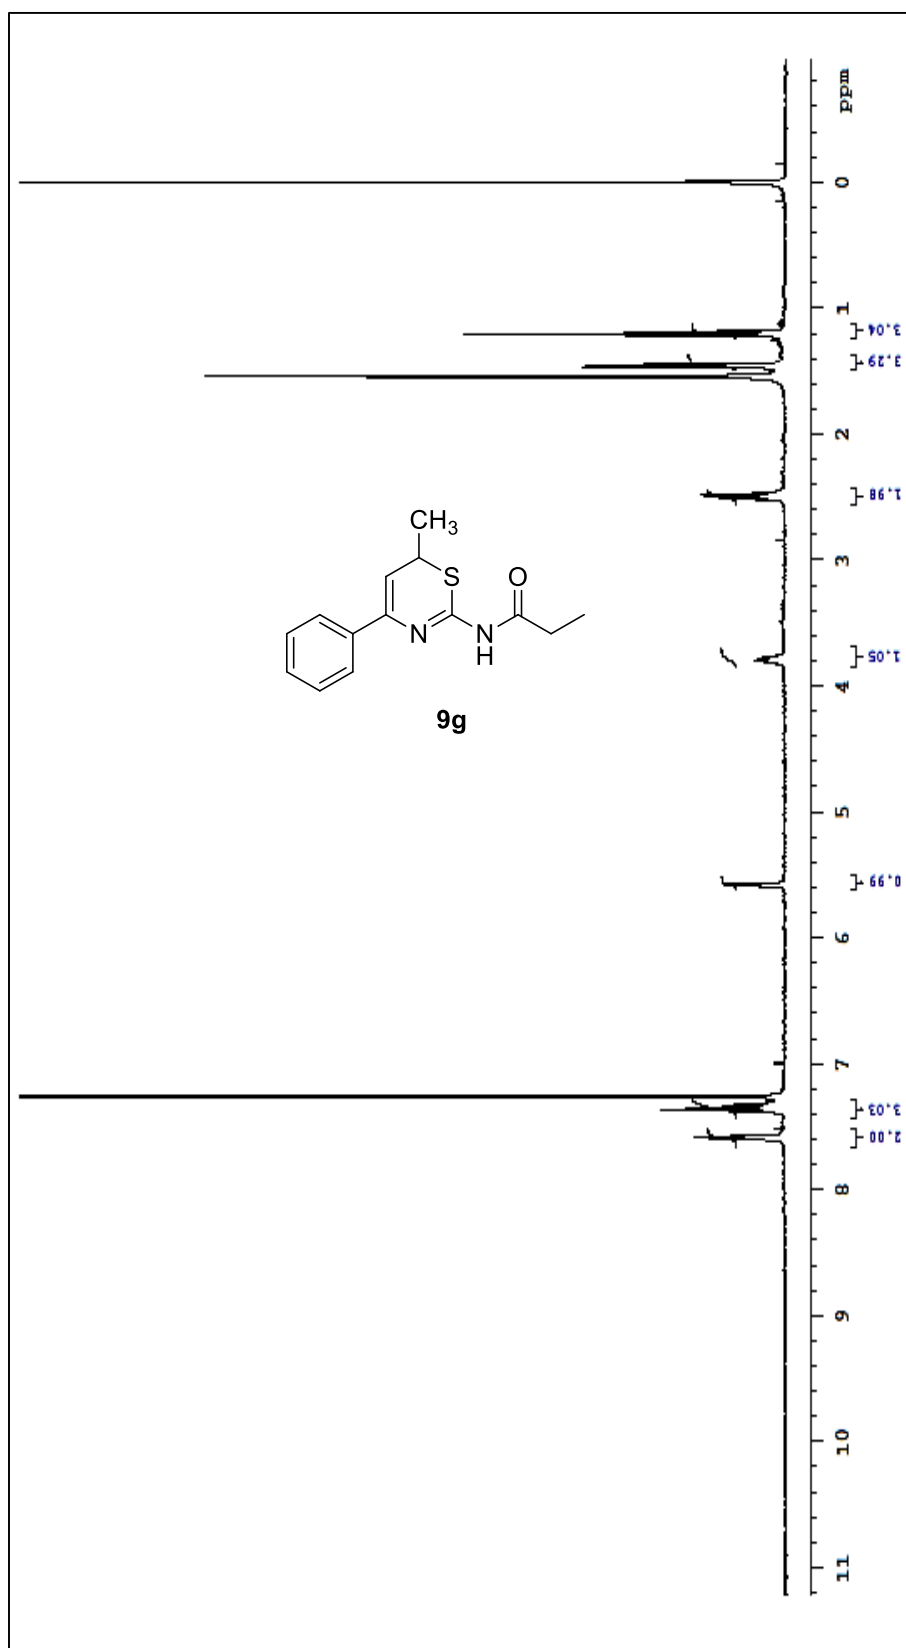

<sup>1</sup>H NMR spectrum of compound 9g



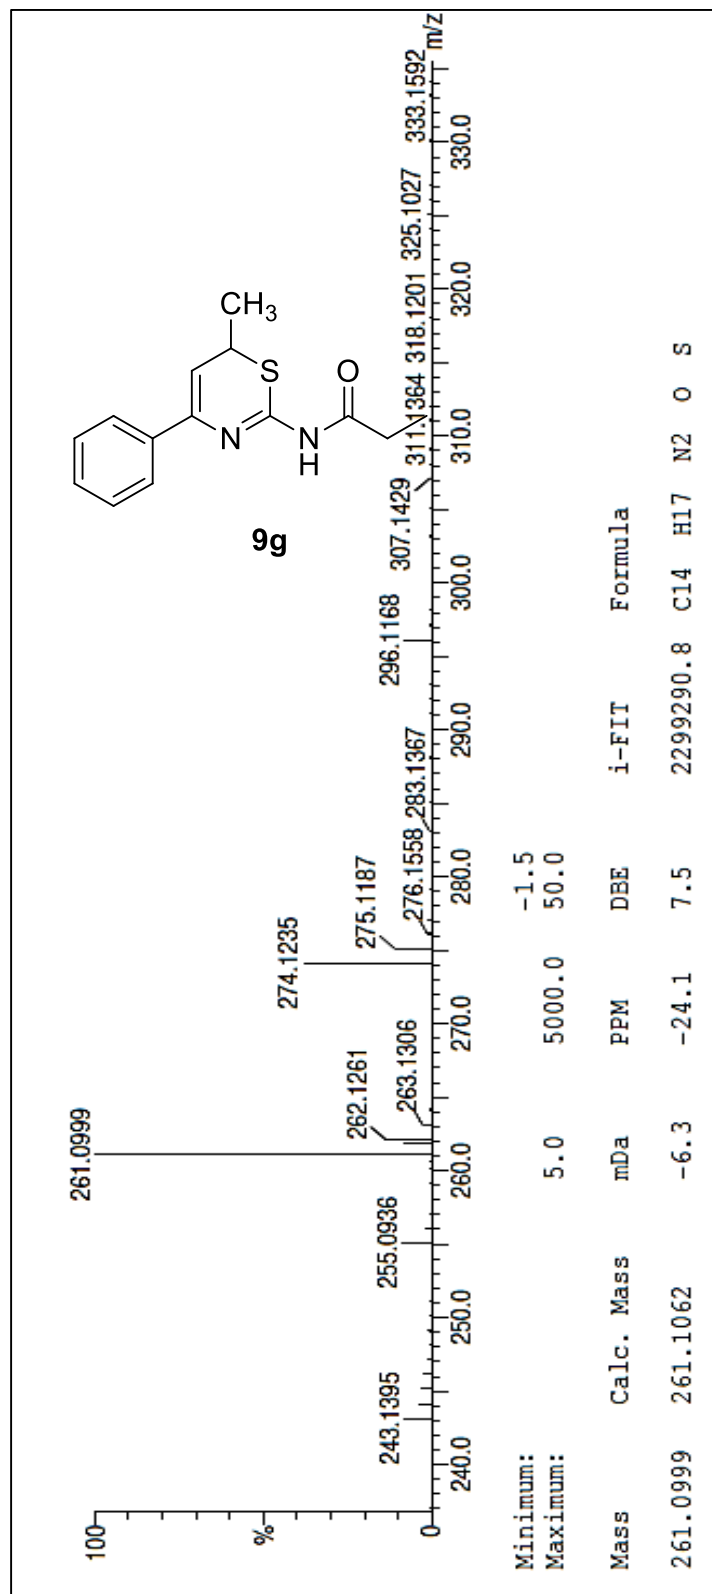

HRMS spectrum compound 9g

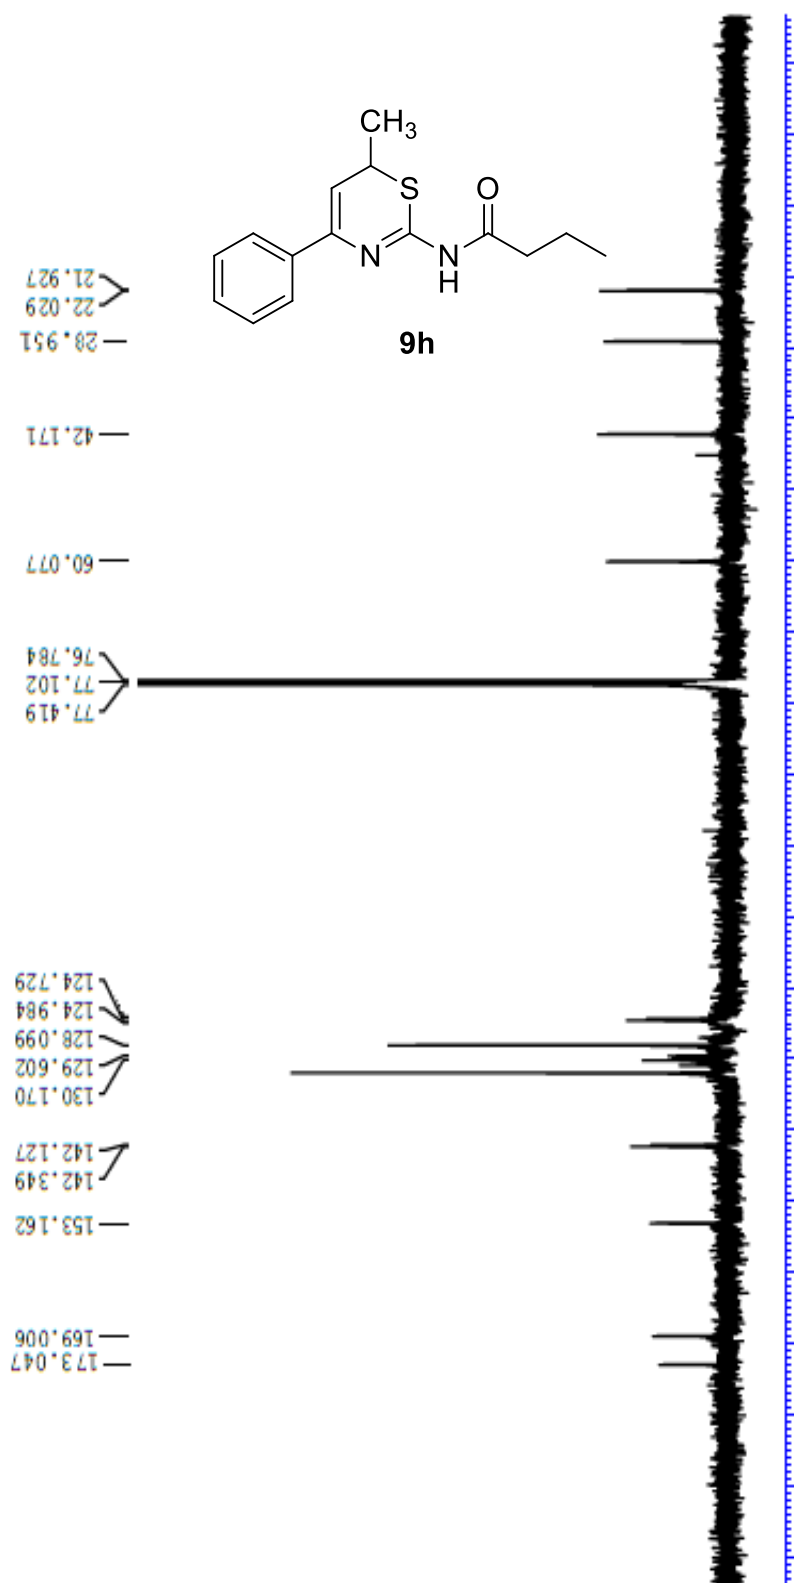

<sup>13</sup>C NMR of 9h

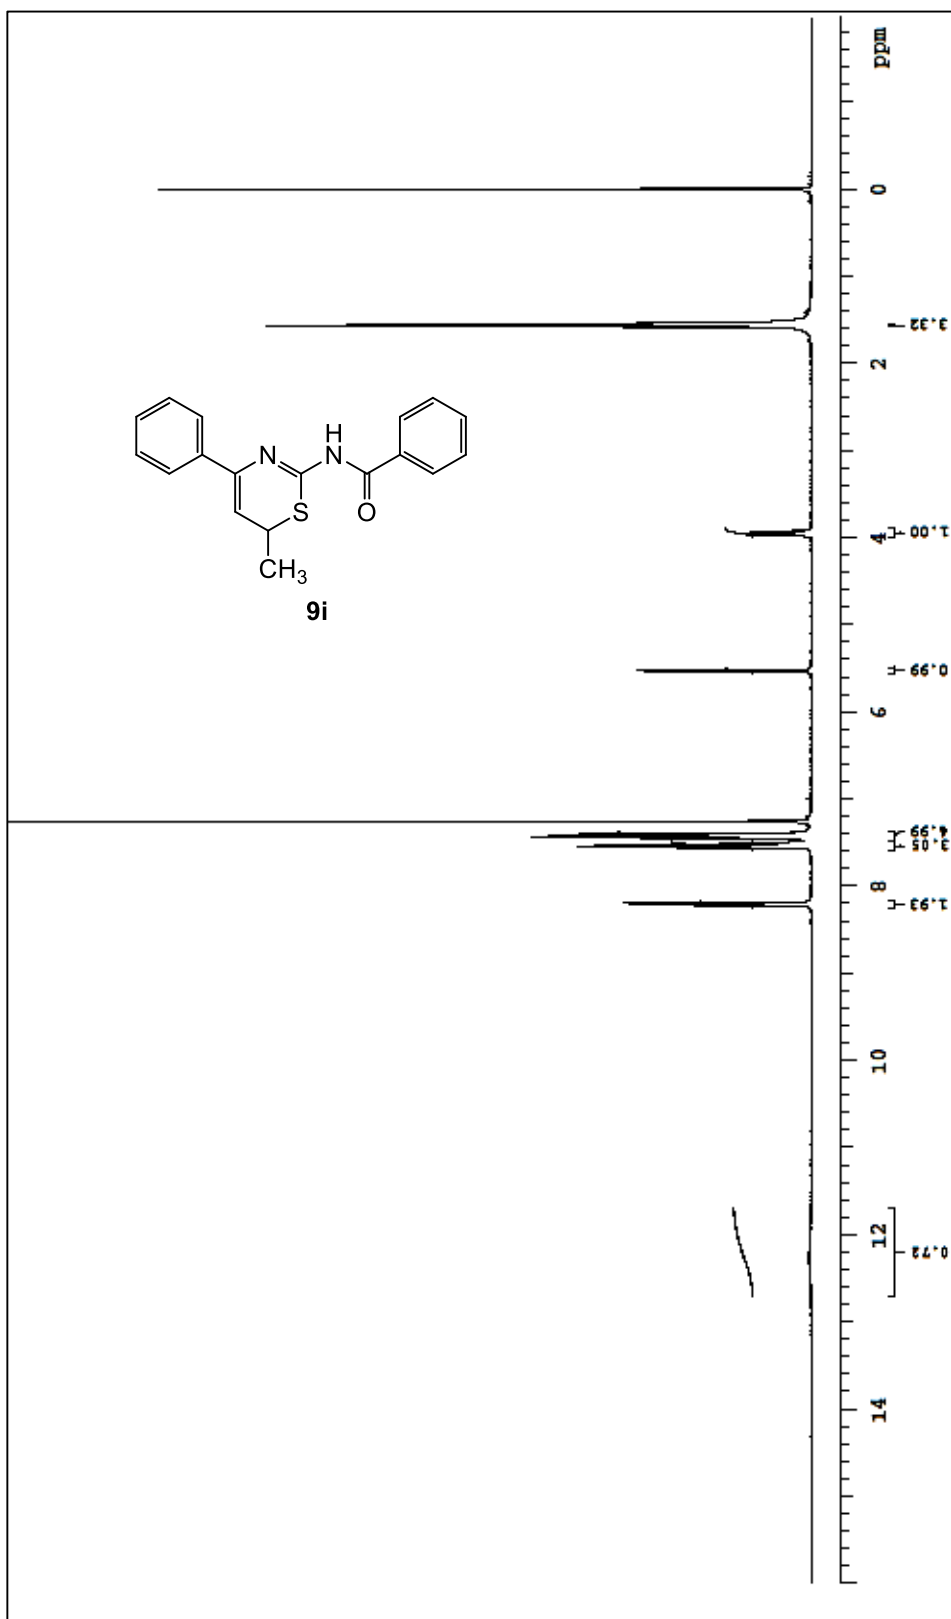

<sup>1</sup>H NMR spectrum of compound 9i

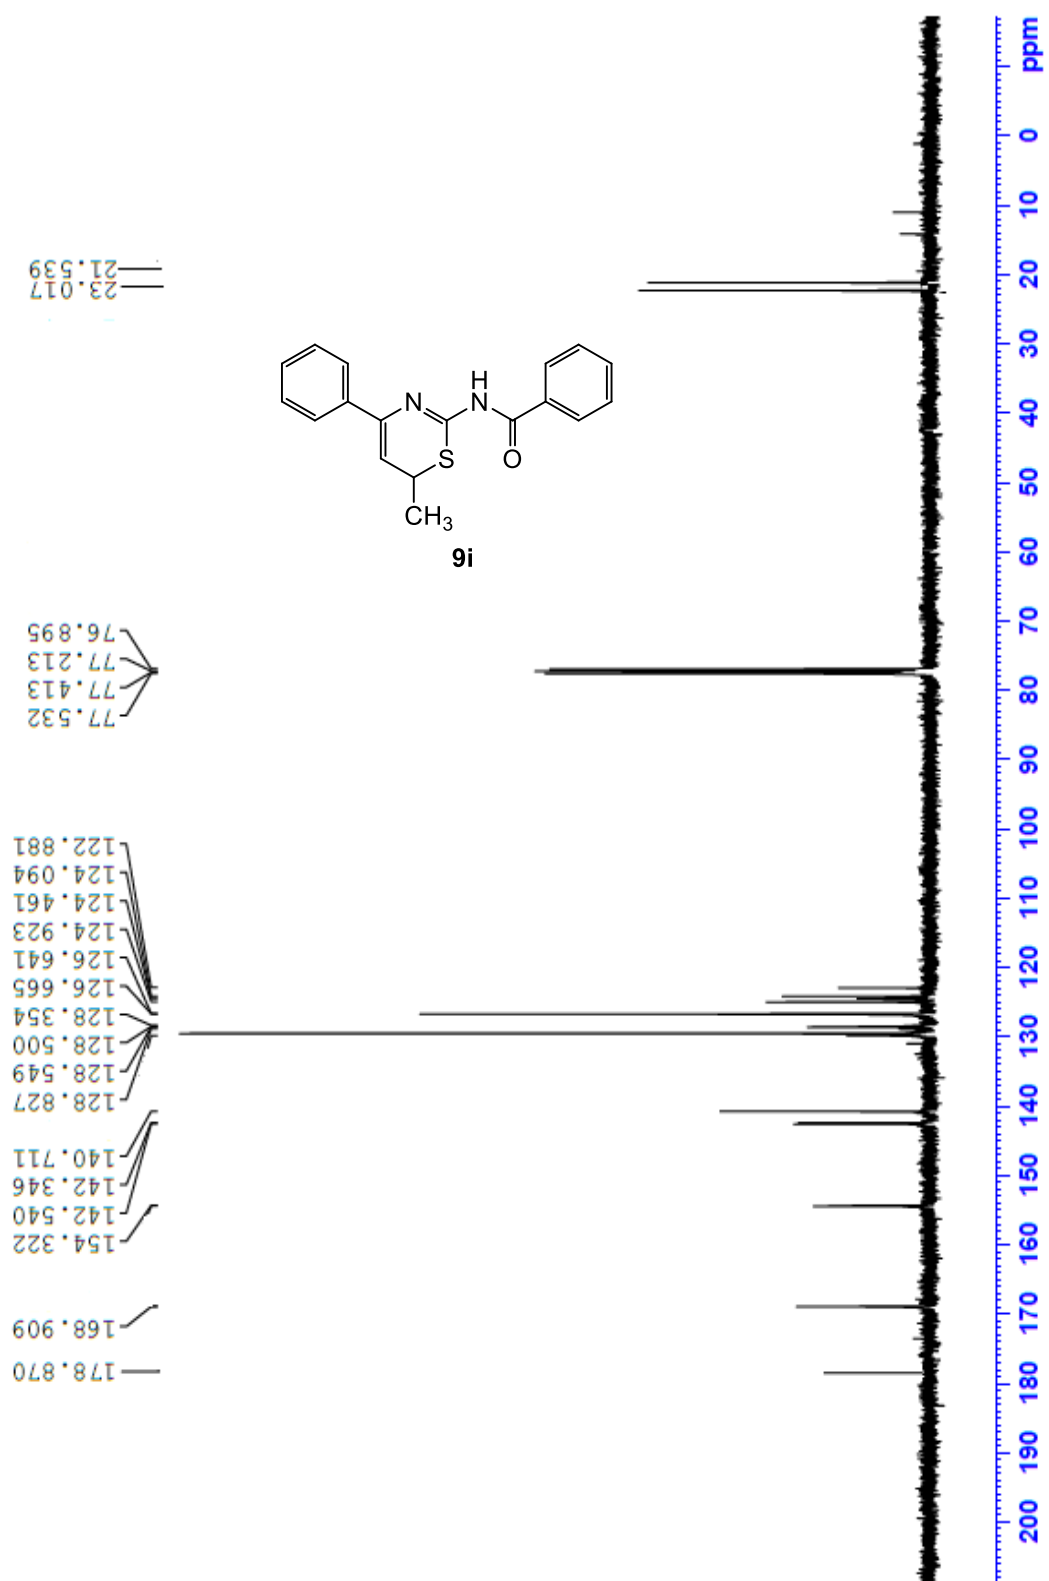

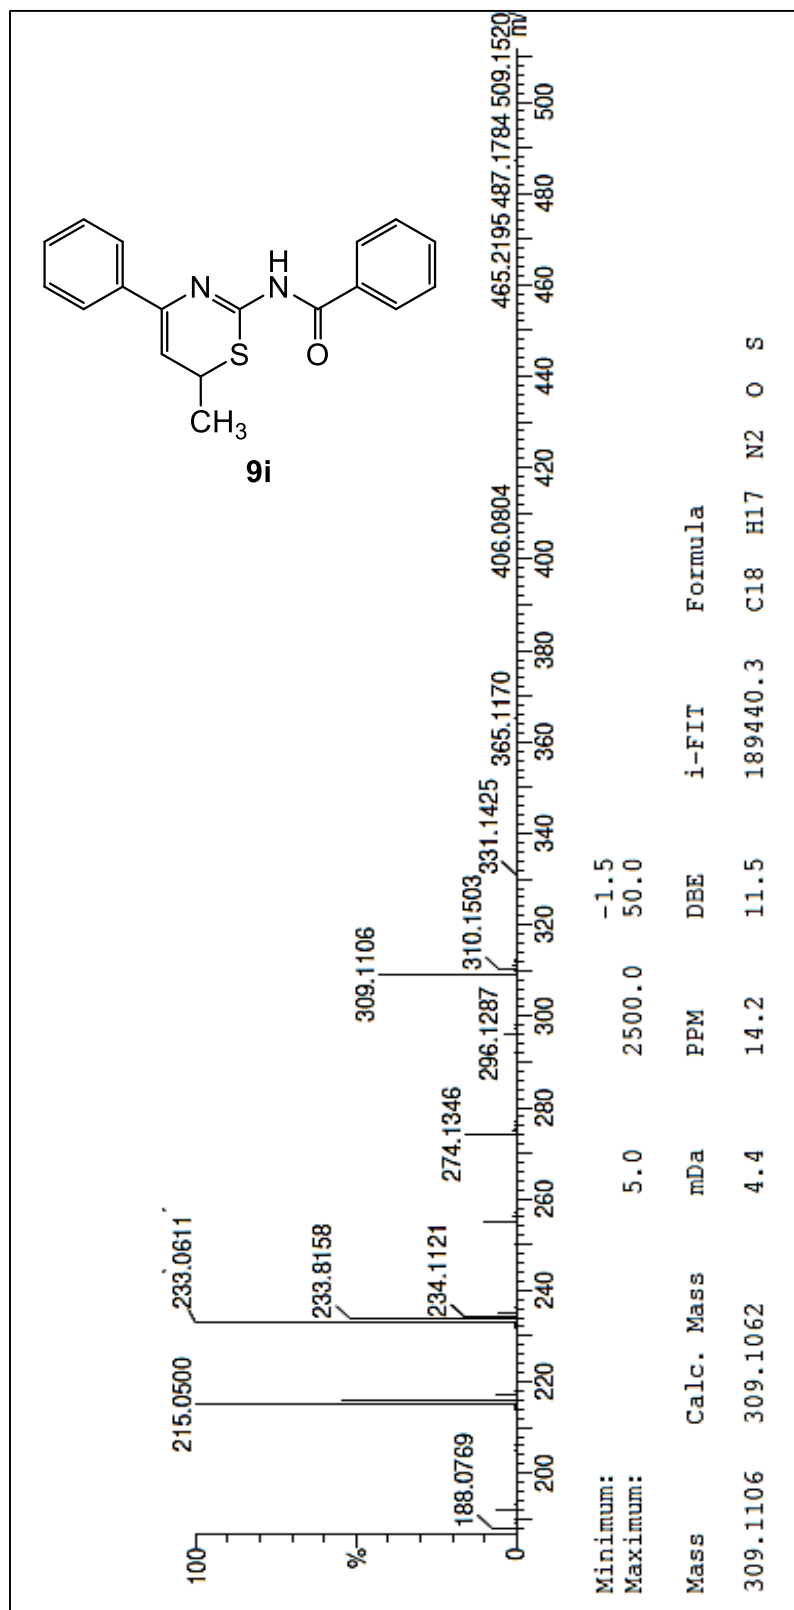

HRMS spectrum of compound 9i

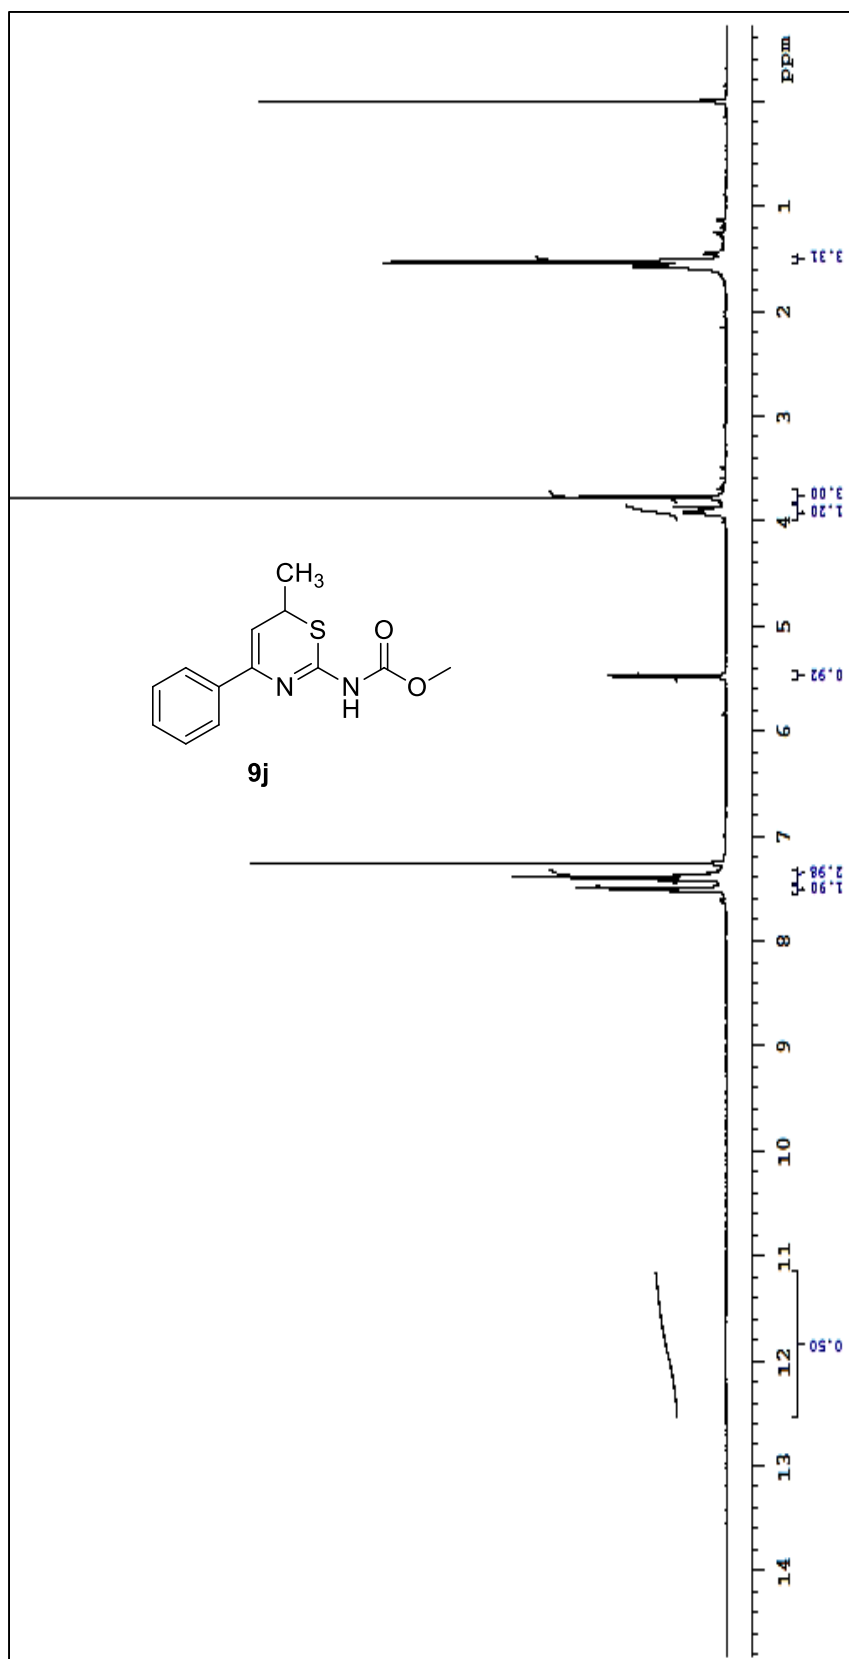

<sup>1</sup>H NMR spectrum of compound 9j

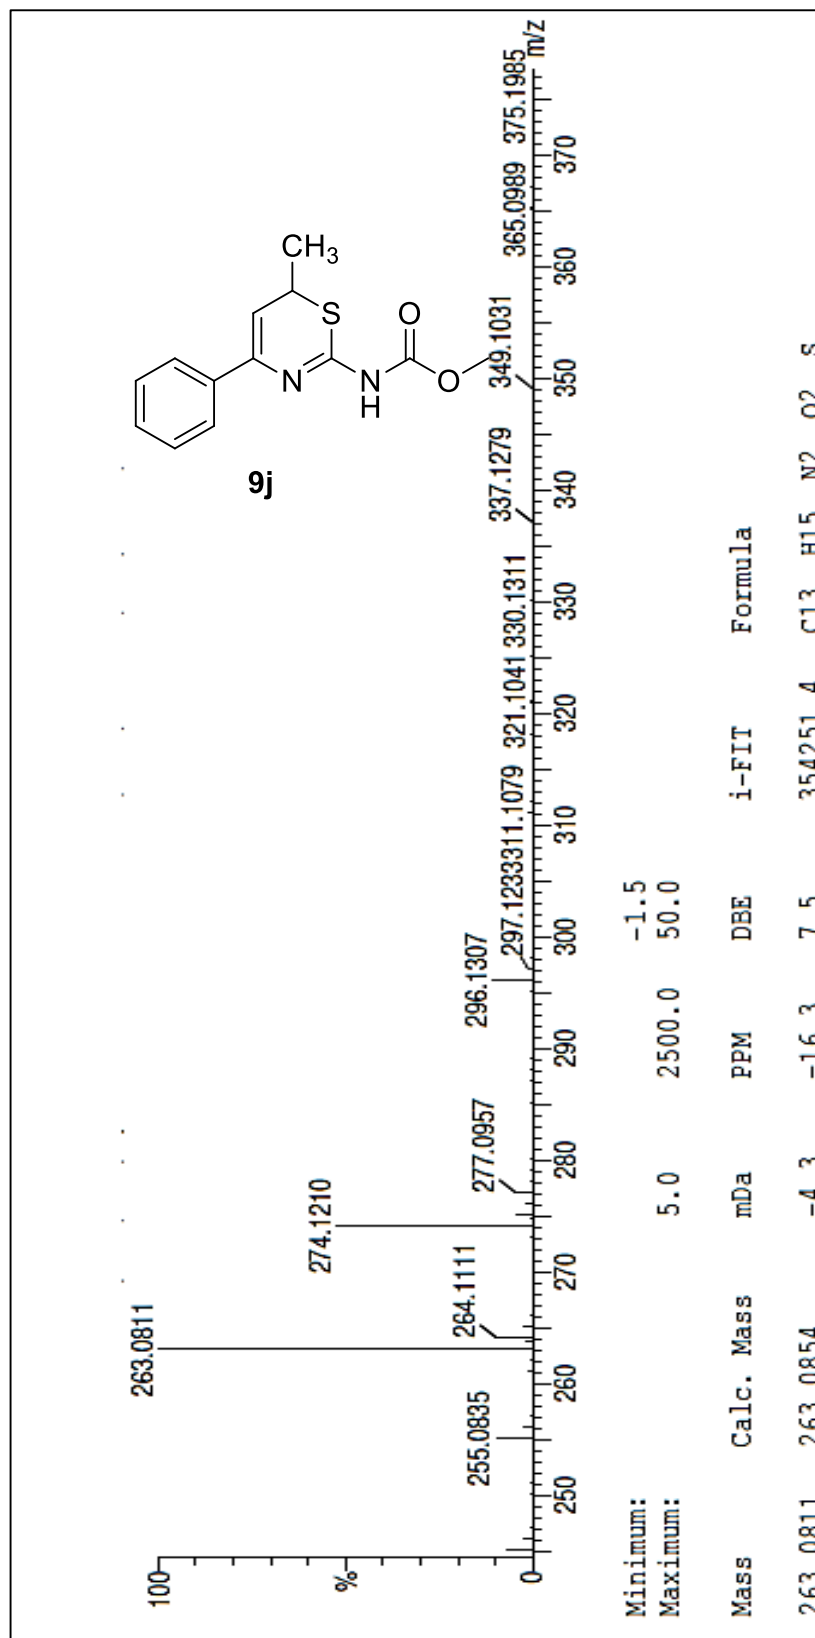

HRMS spectrum of compound 9j

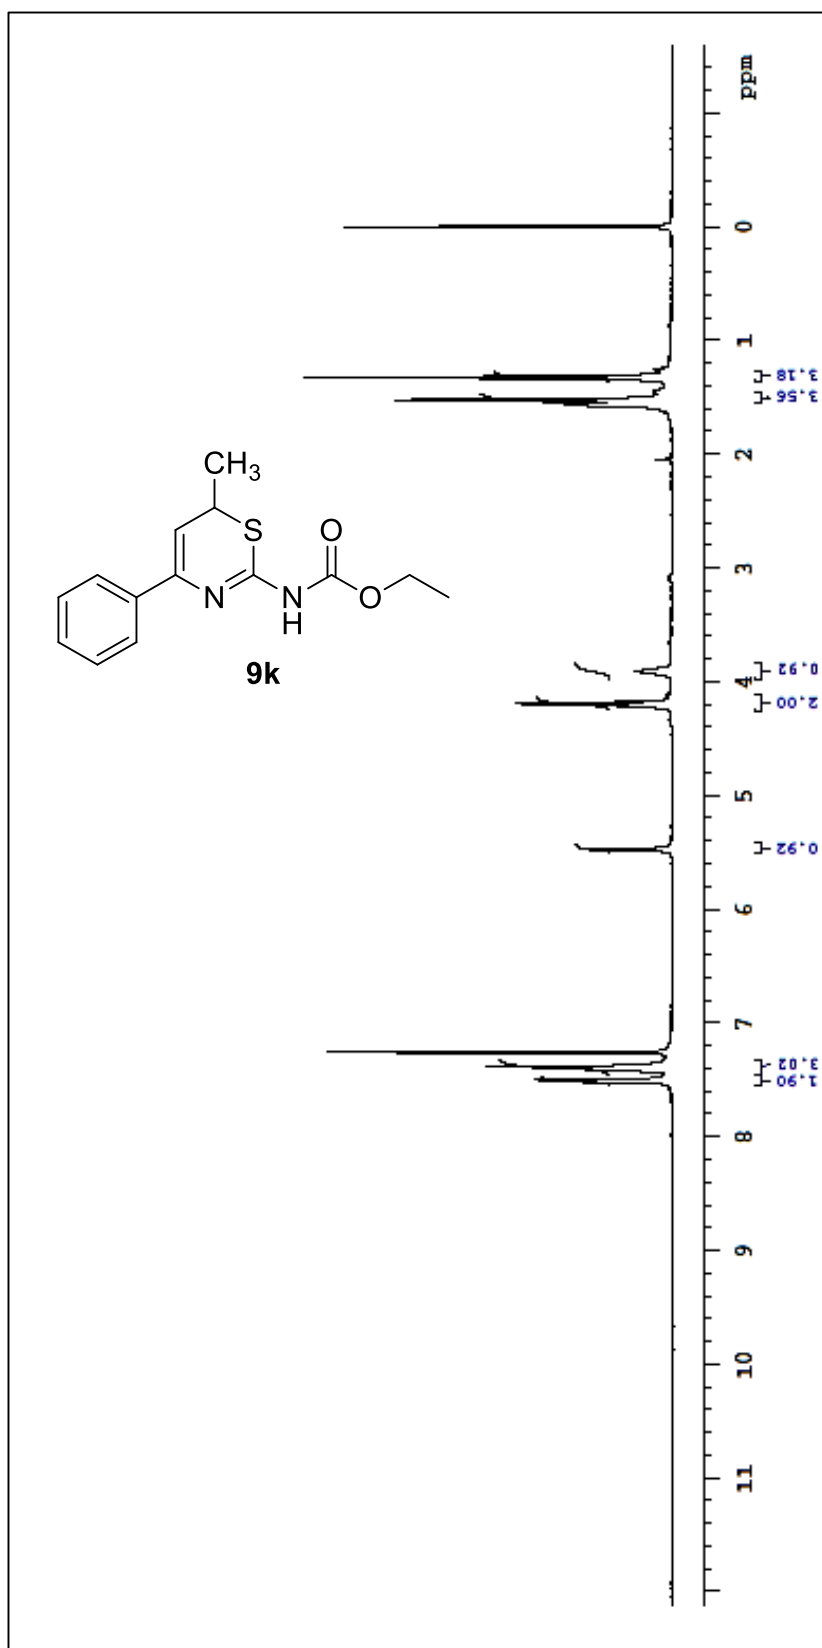

<sup>1</sup>H NMR spectrum of compound **9k**



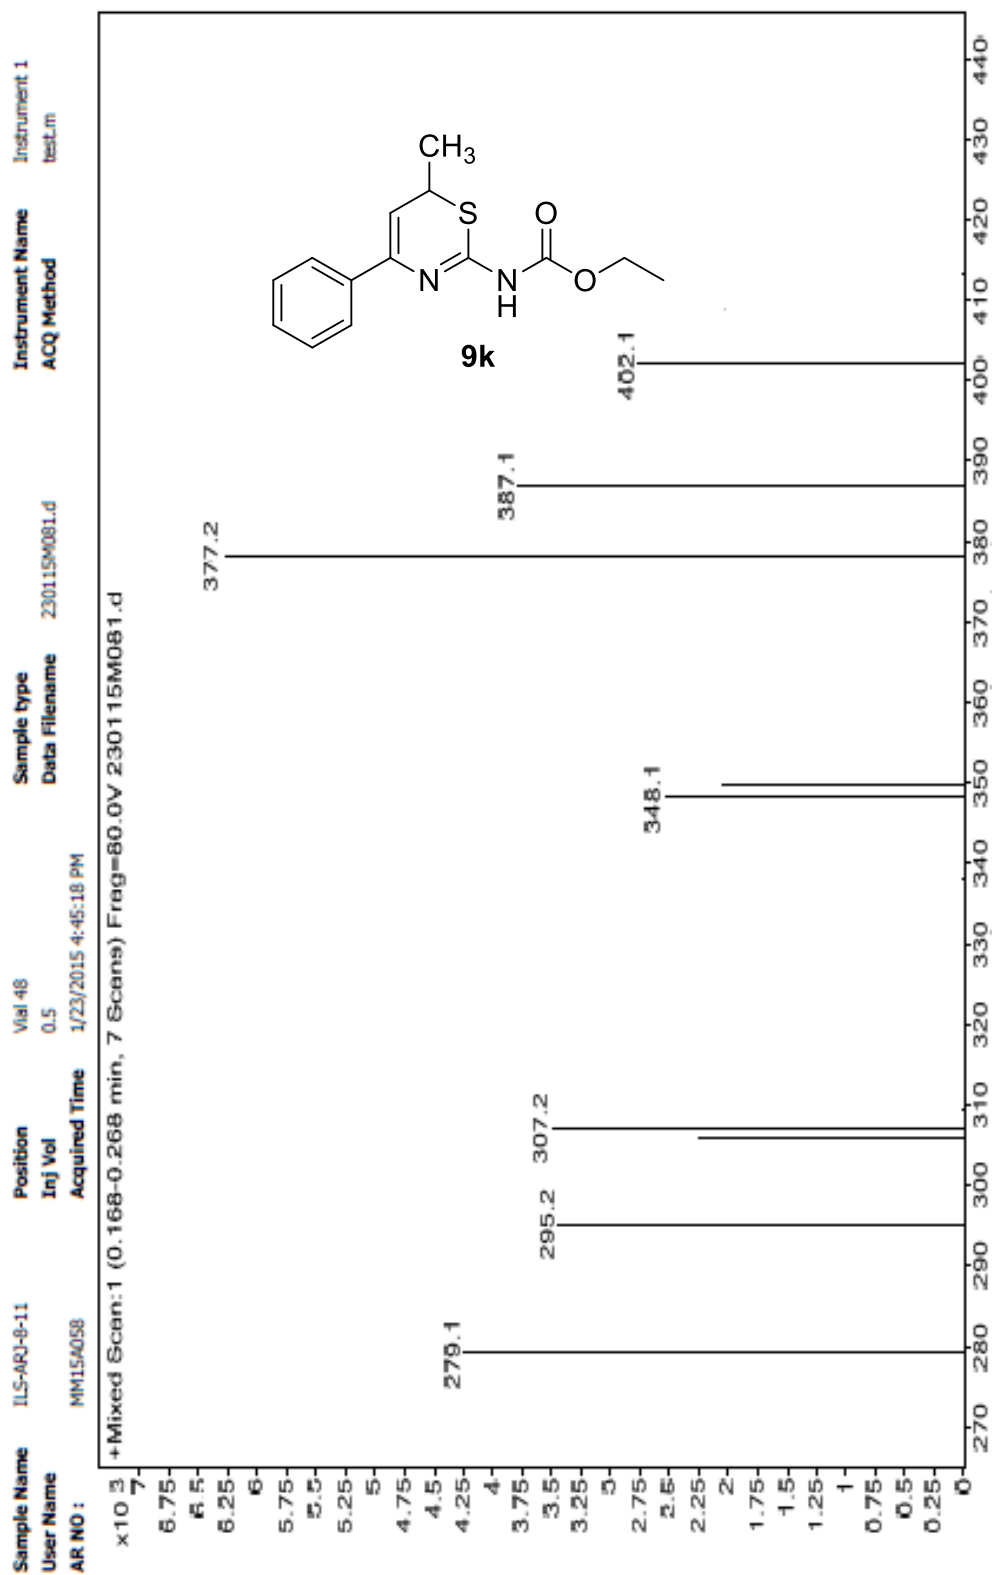

LC-MS spectrum of 9k

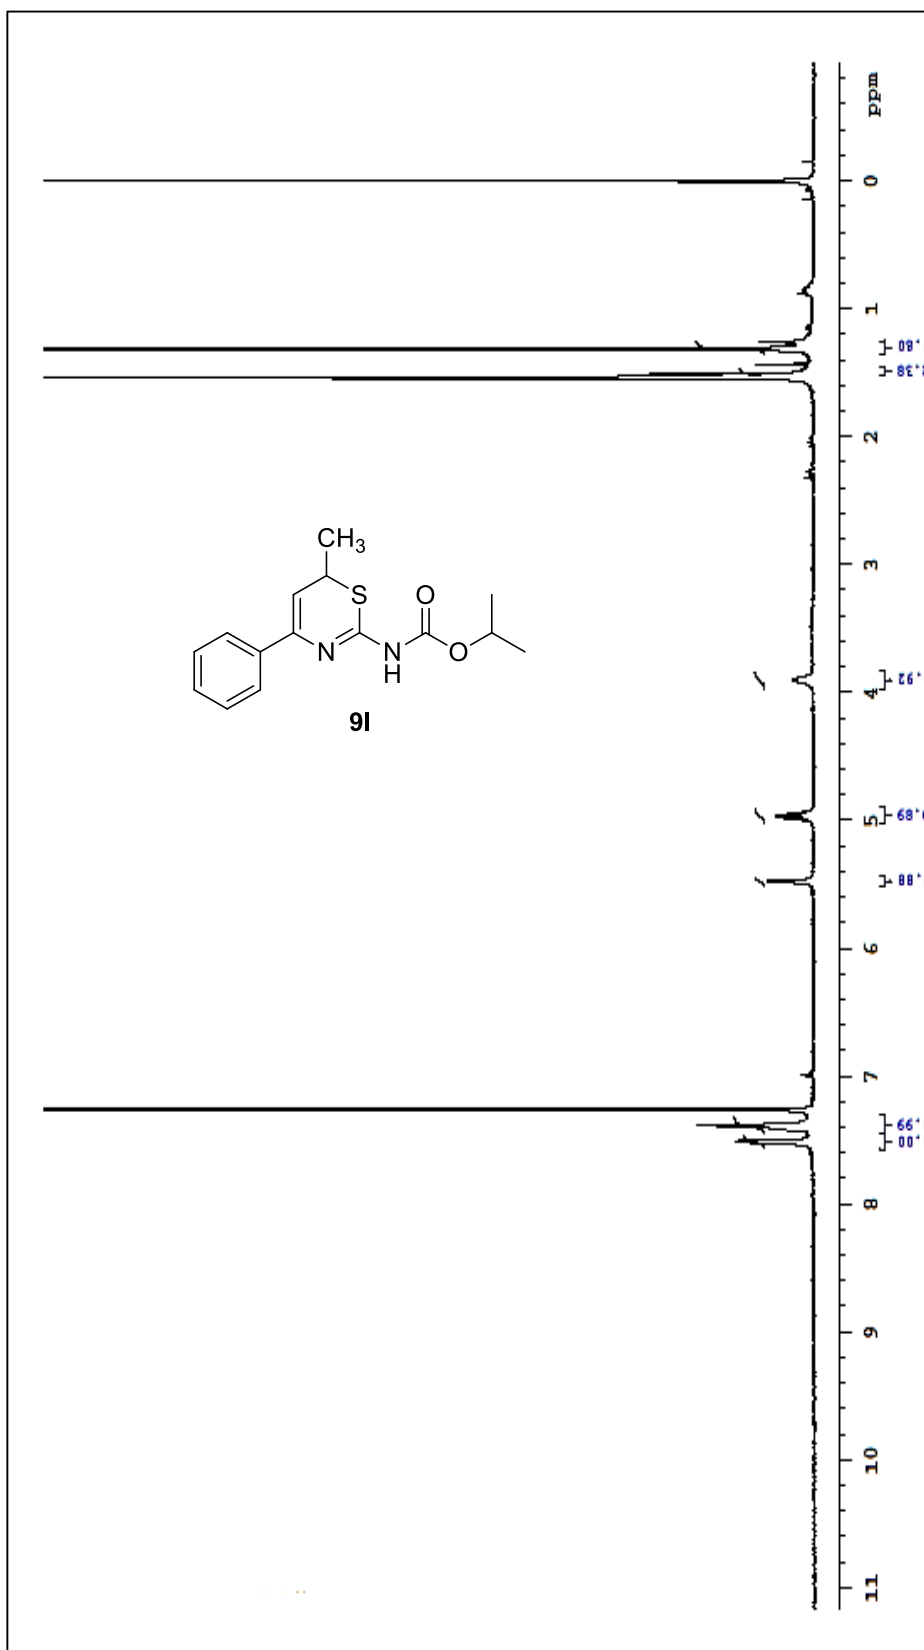

<sup>1</sup>H NMR spectrum of compound 9l

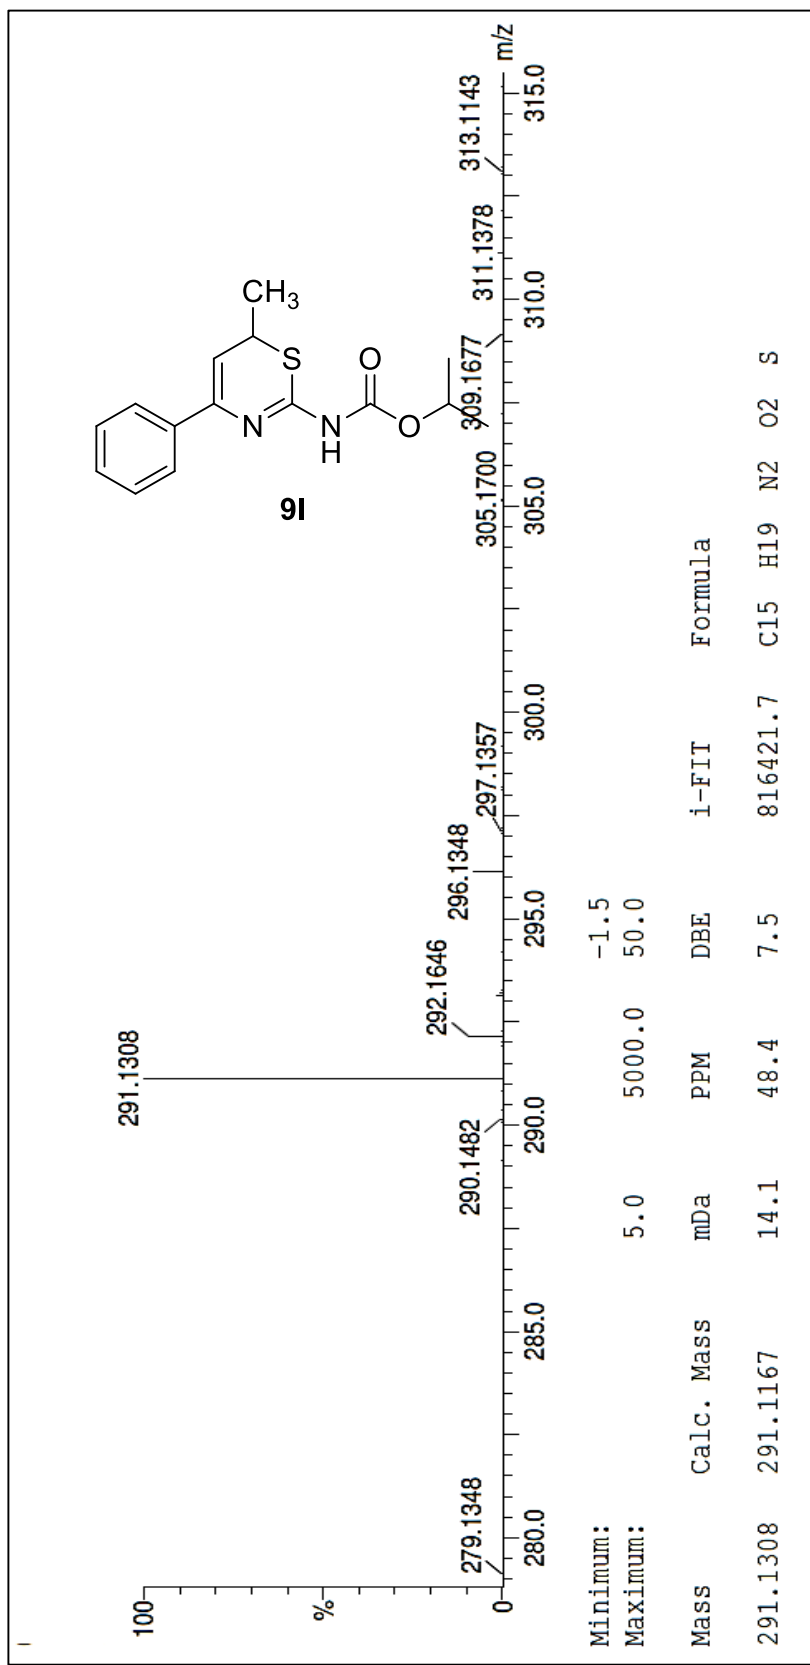

**HRMS spectrum of compound 9l**

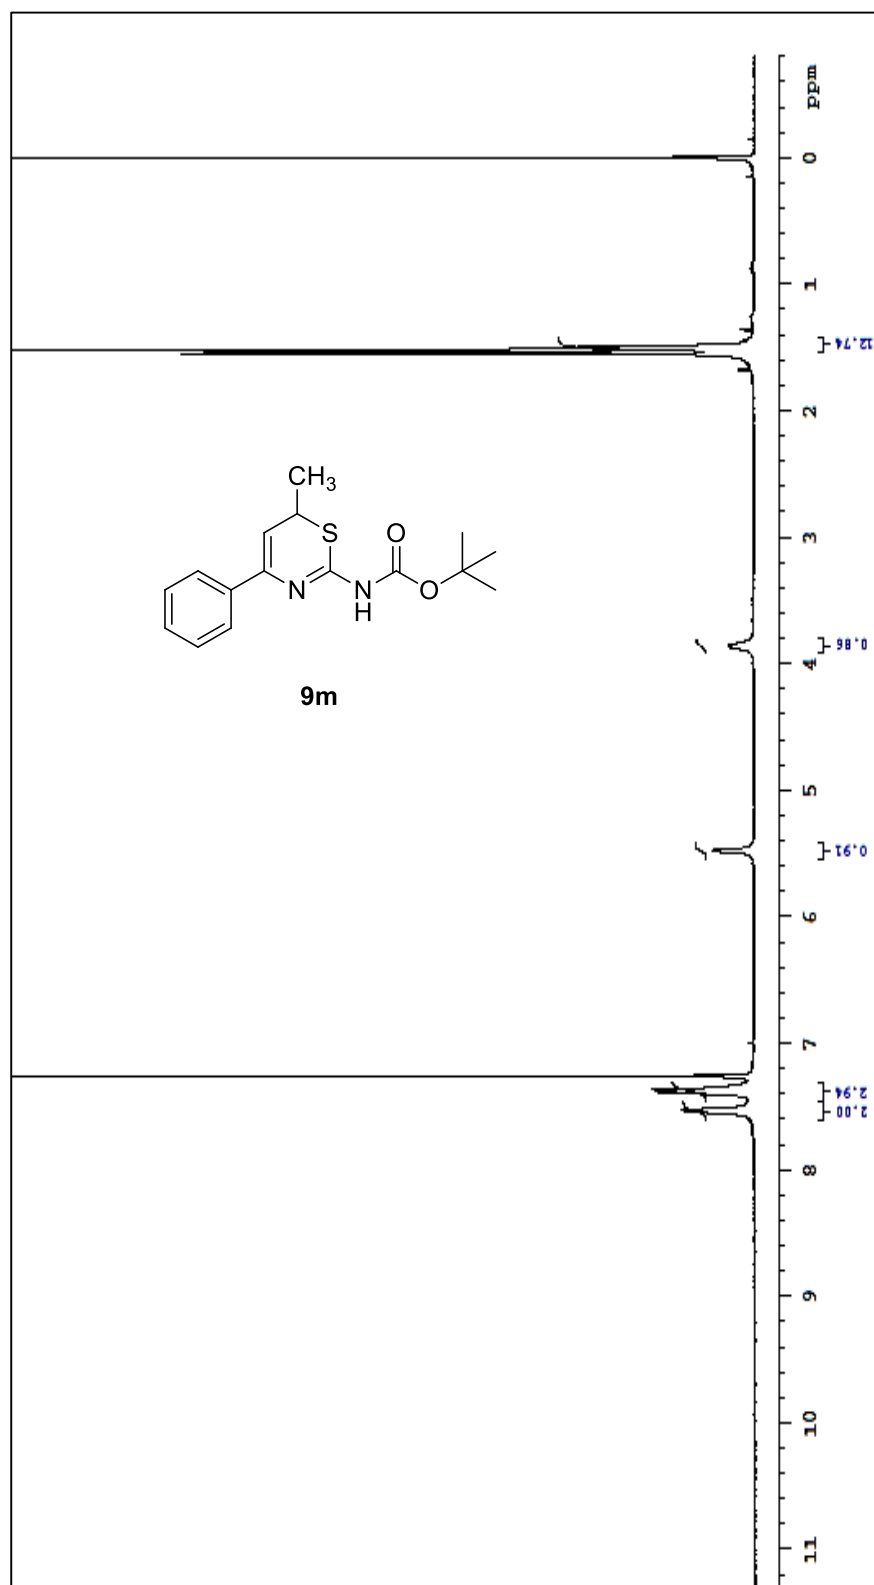

<sup>1</sup>H NMR spectrum of compound 9m

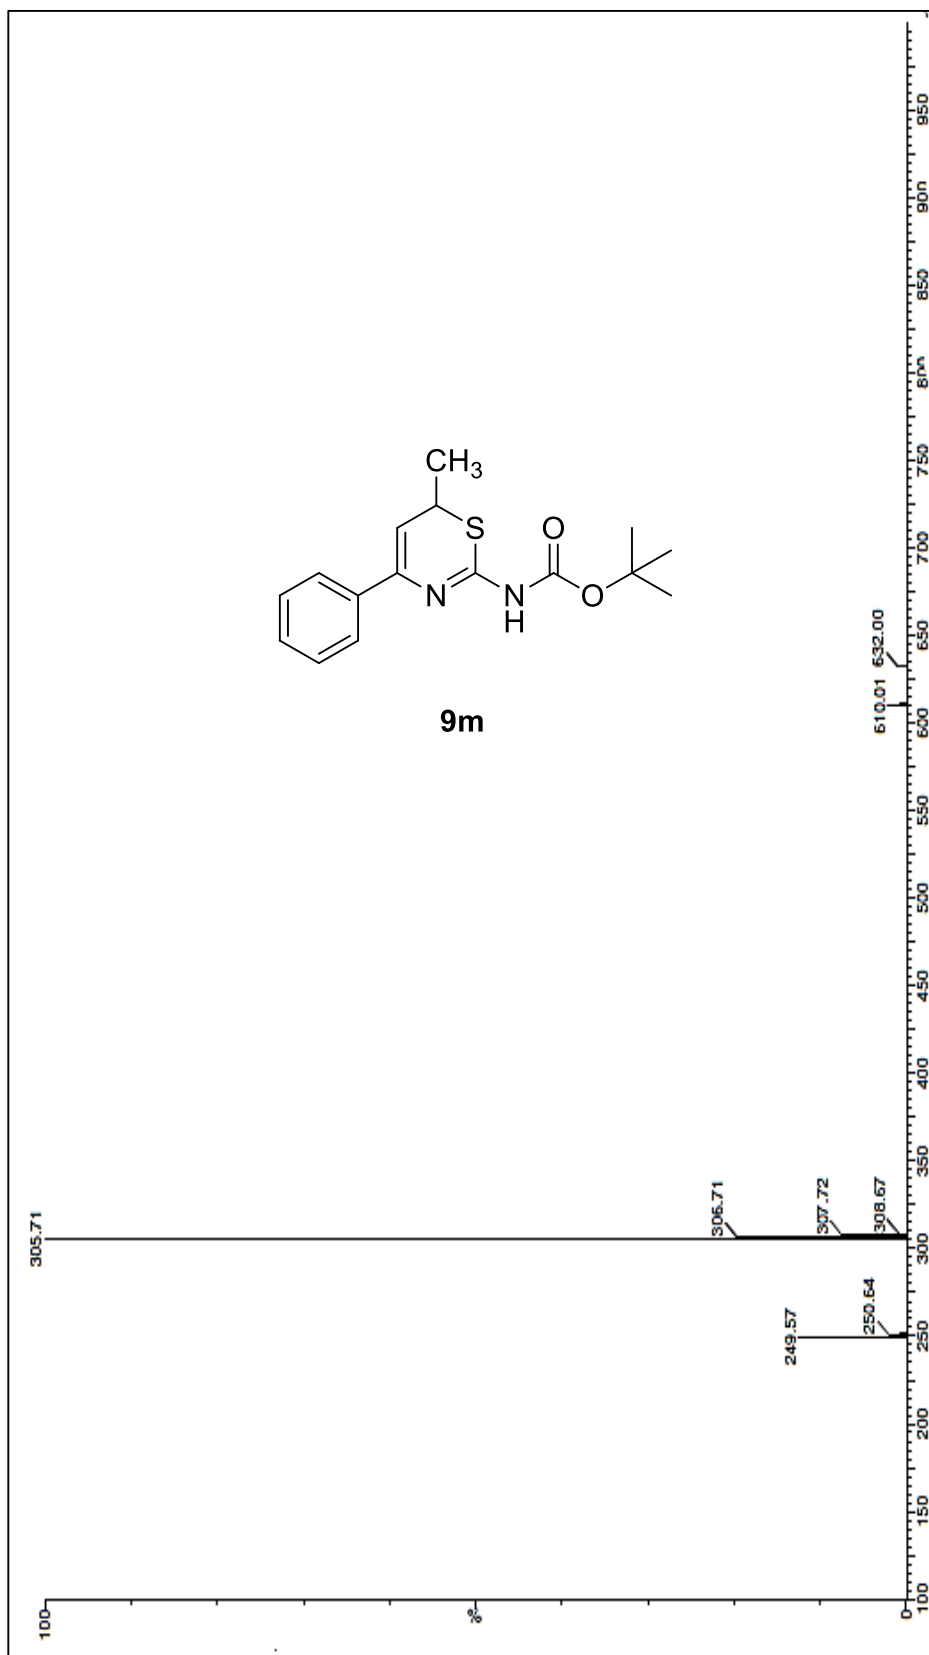

LC-MS spectrum of compound 9m

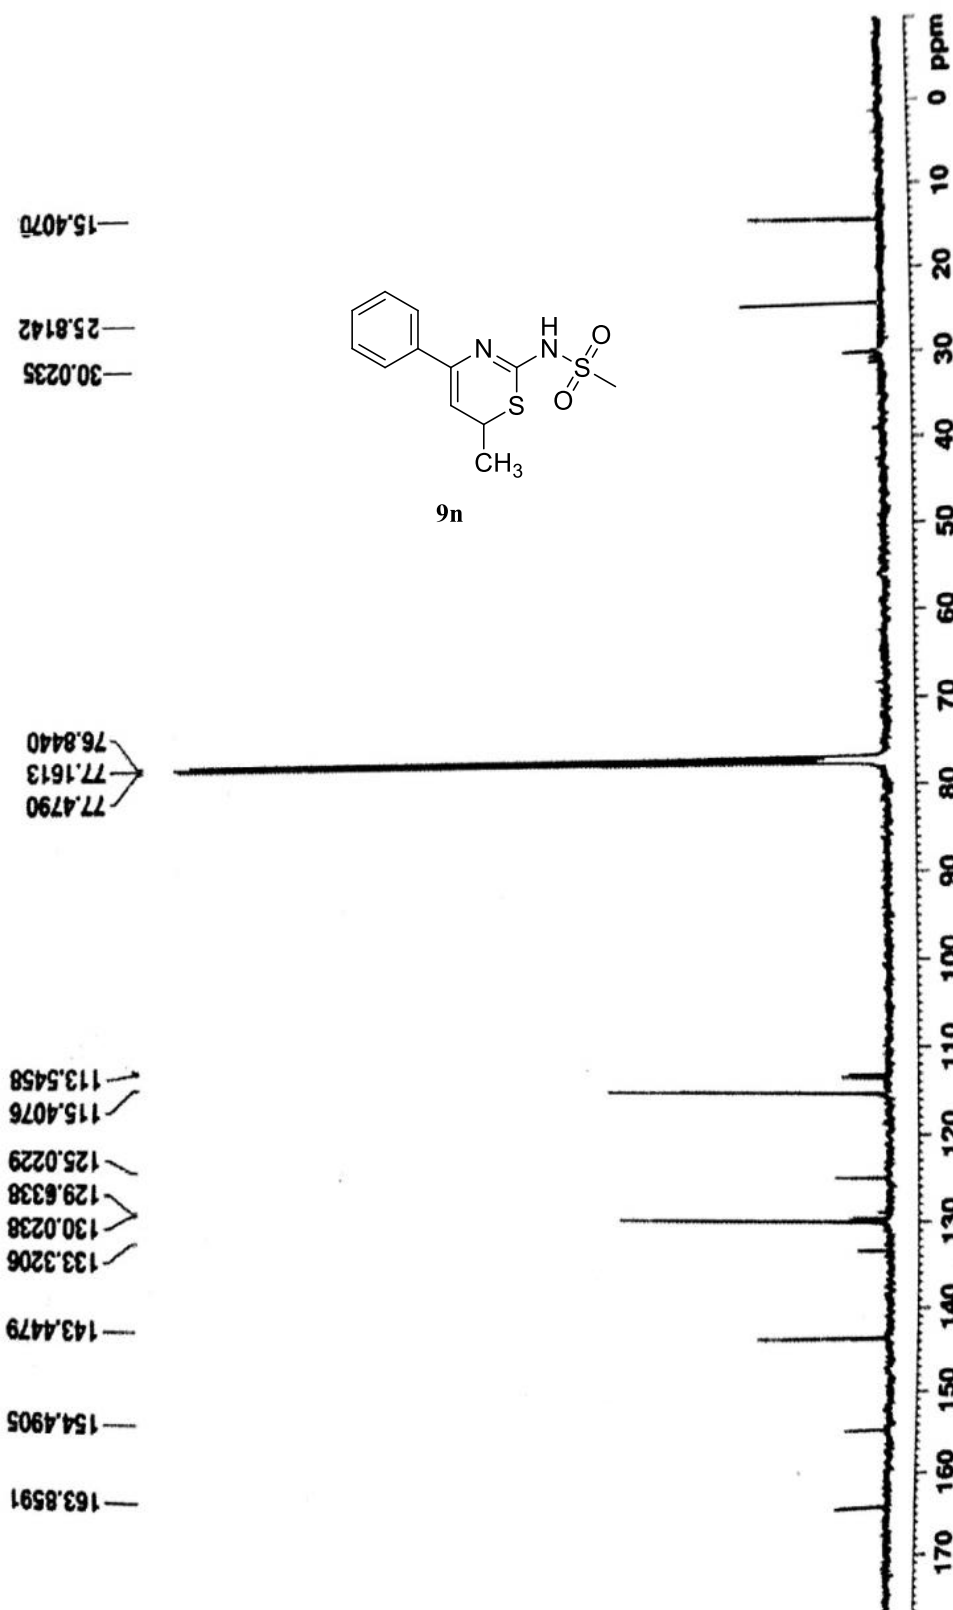

$^{13}\text{C}$  NMR of 6n

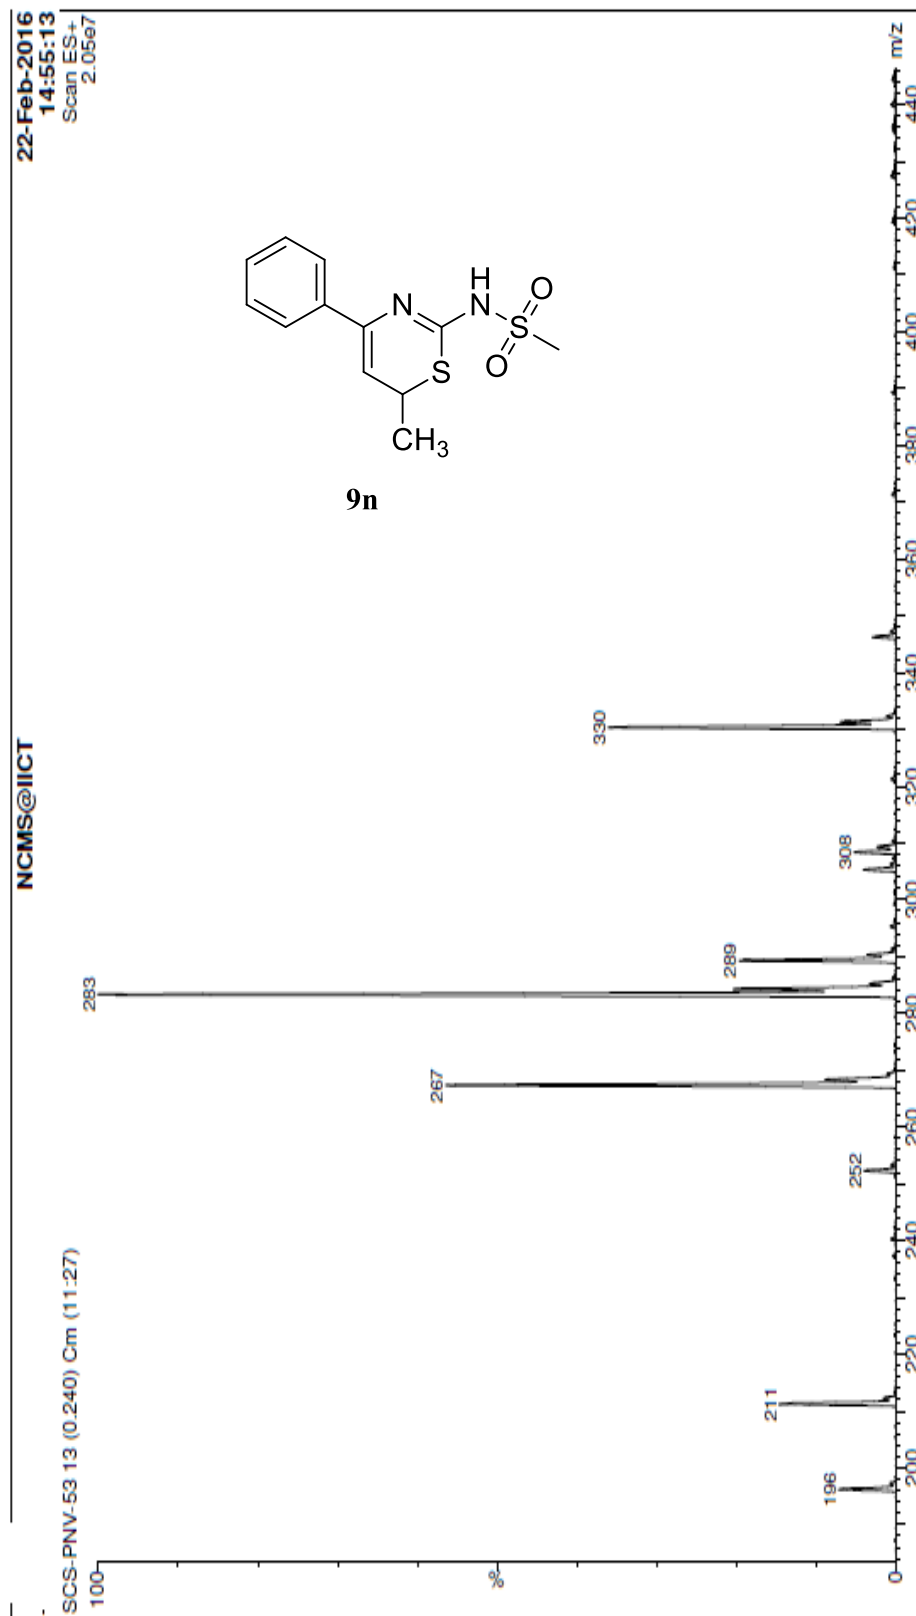

Mass spectrum of compound of 9n

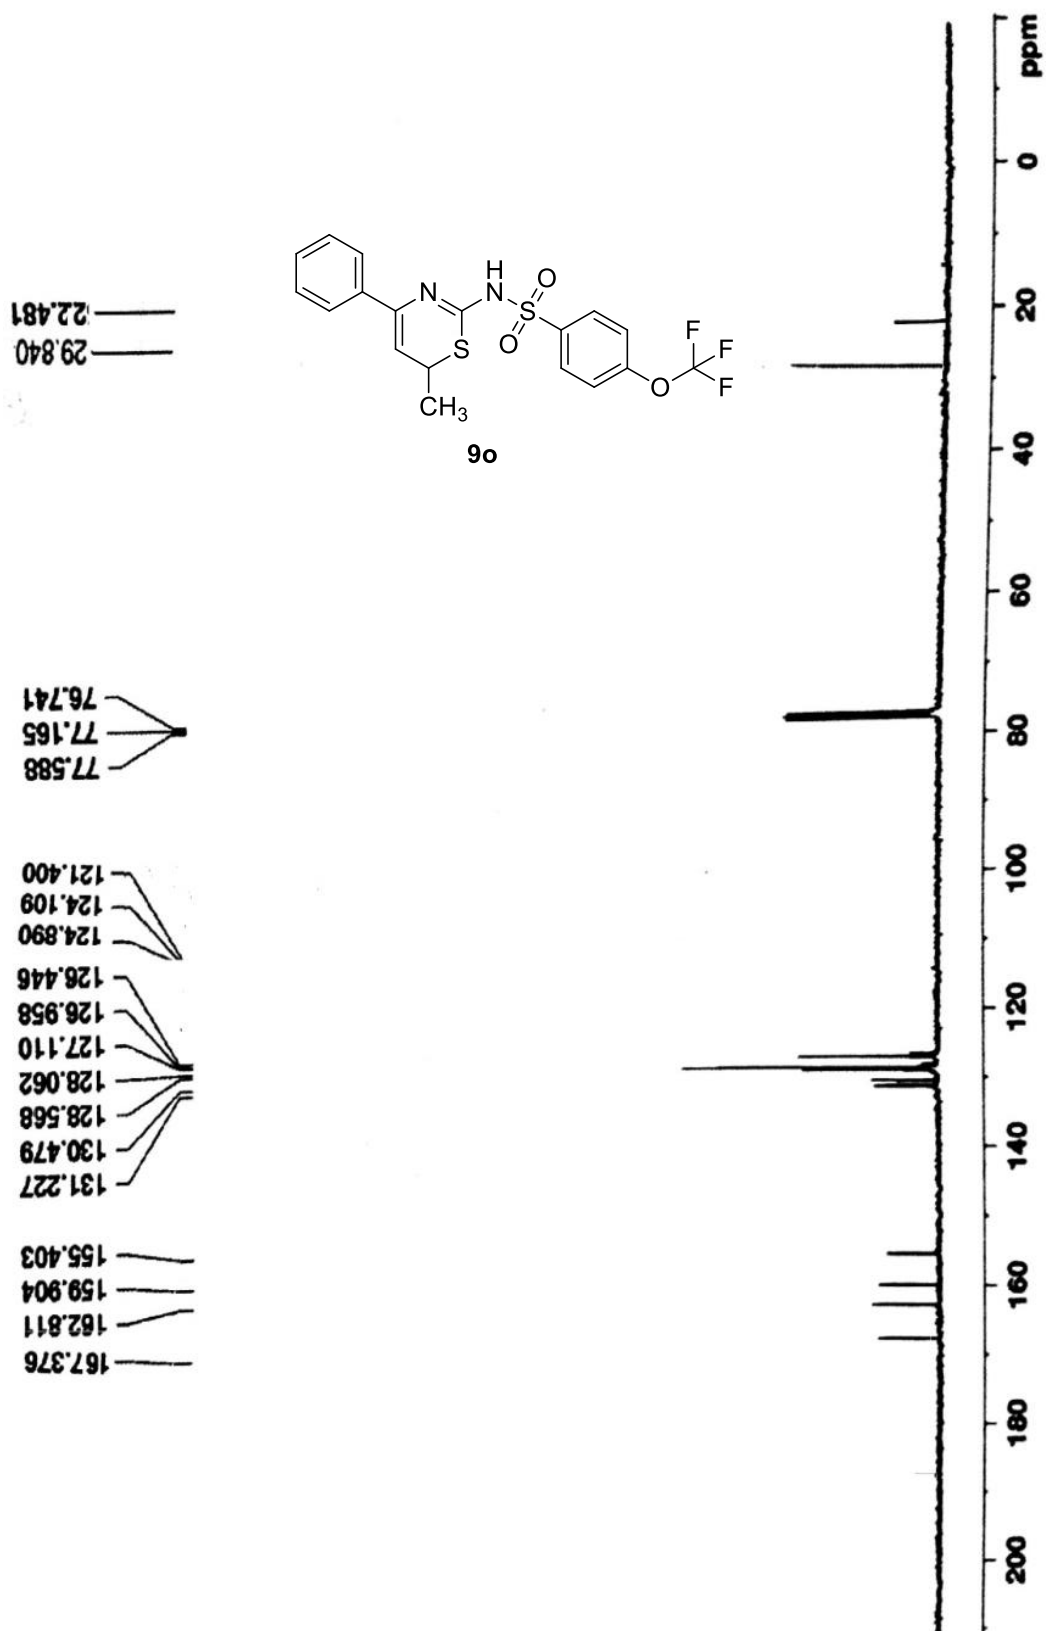

**<sup>13</sup>C NMR of 9o**



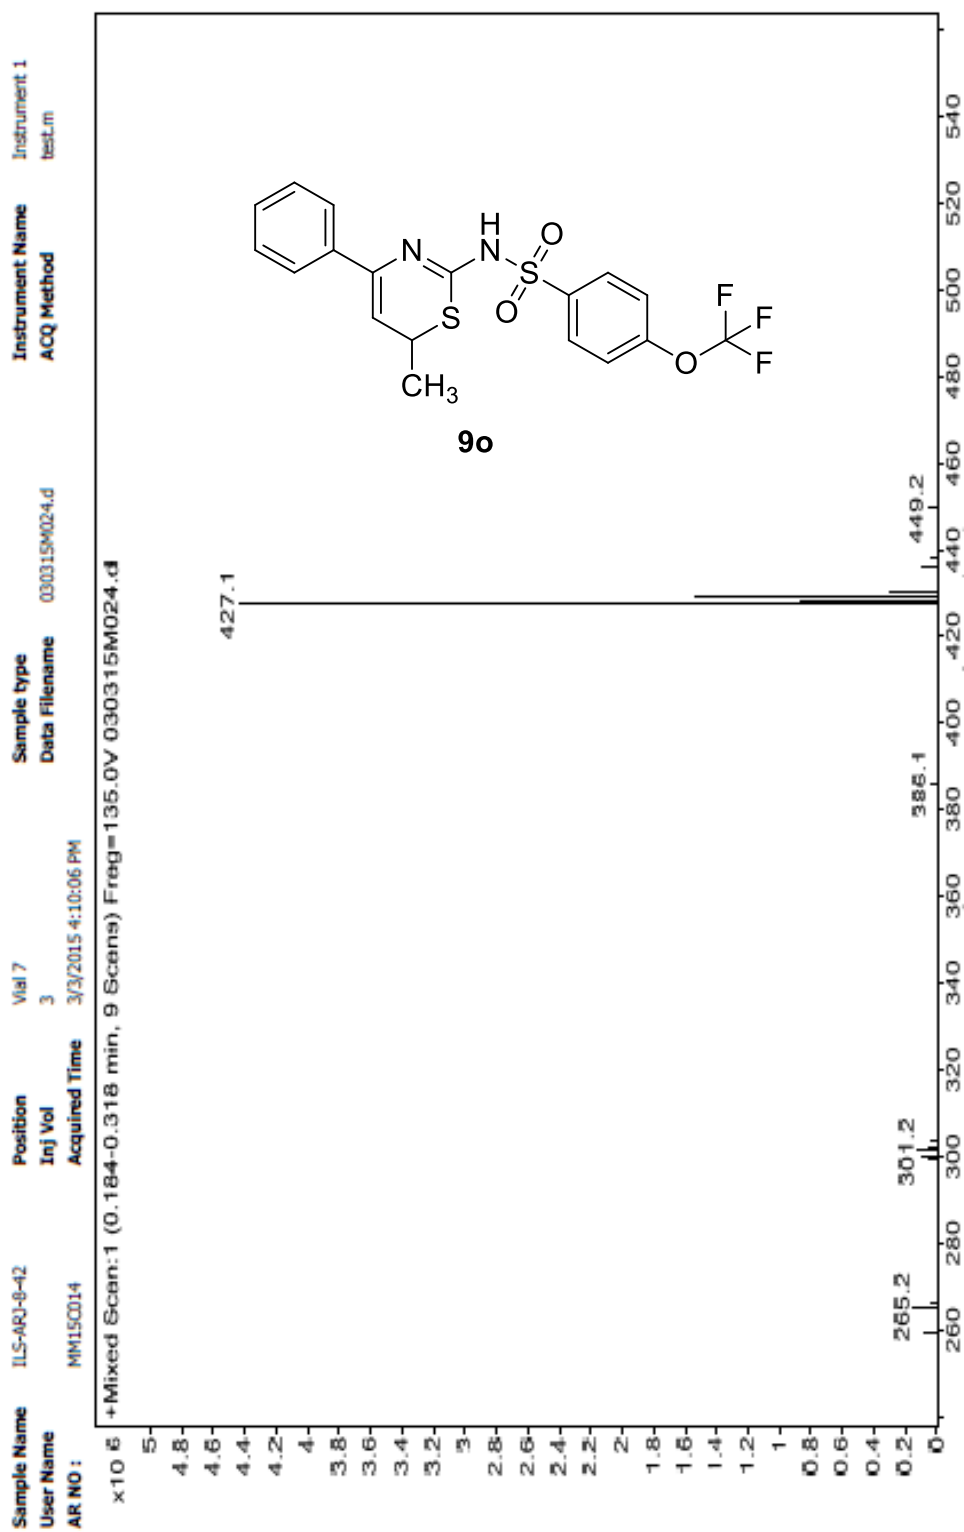

Mass spectrum of compound of 9o

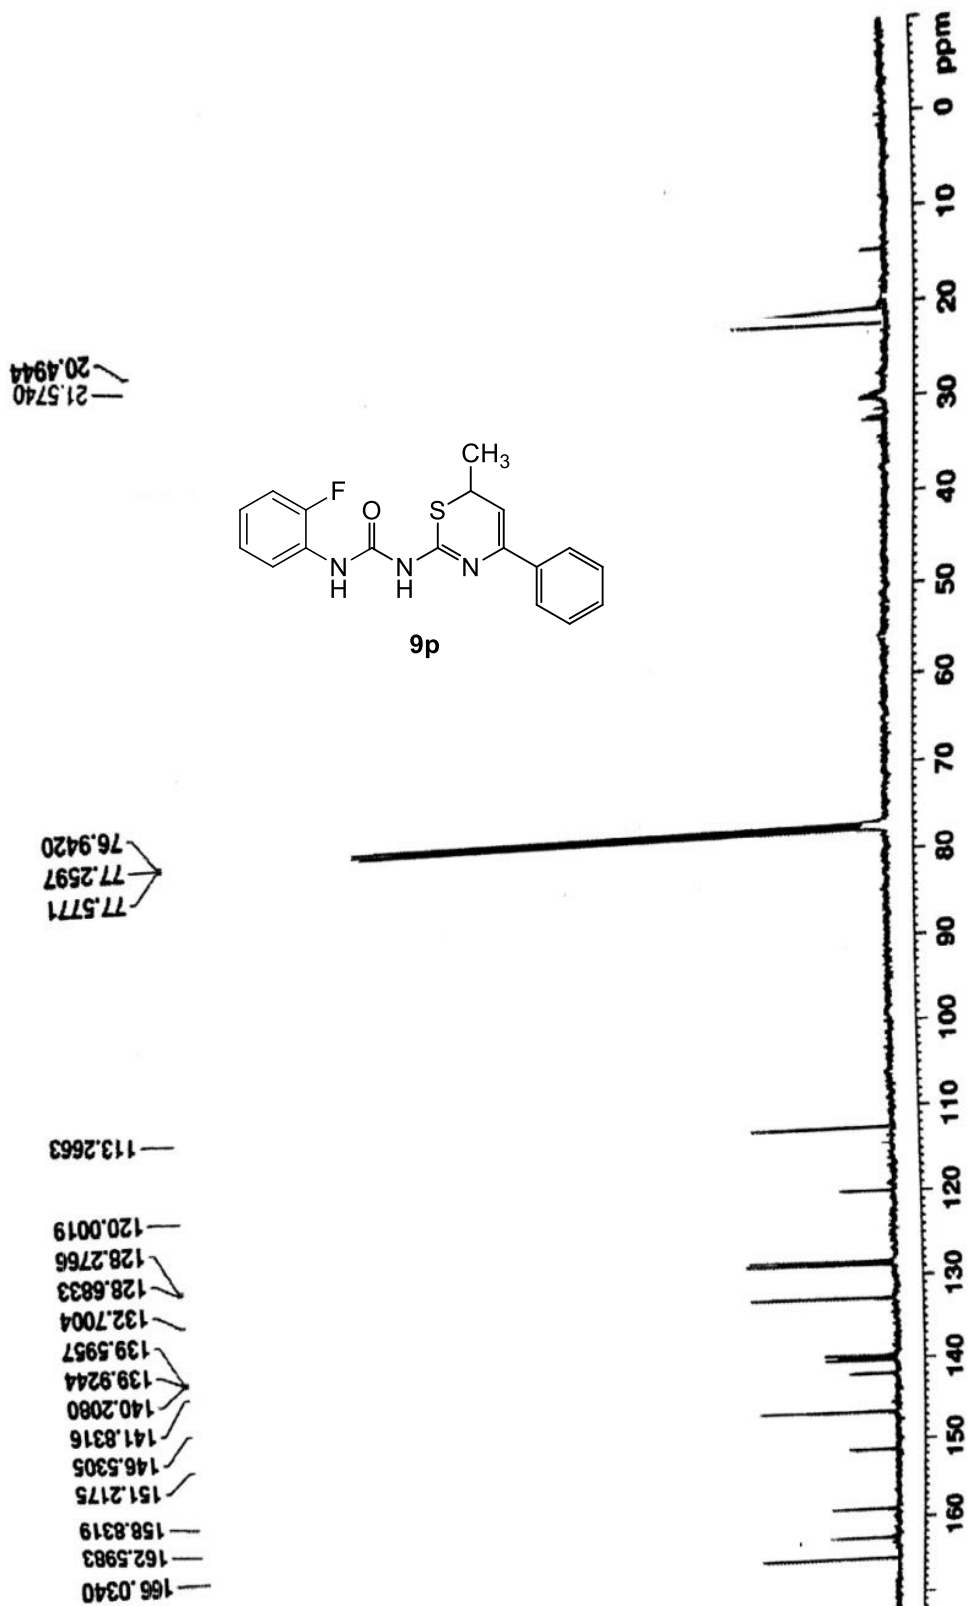

<sup>13</sup>C NMR of 6p

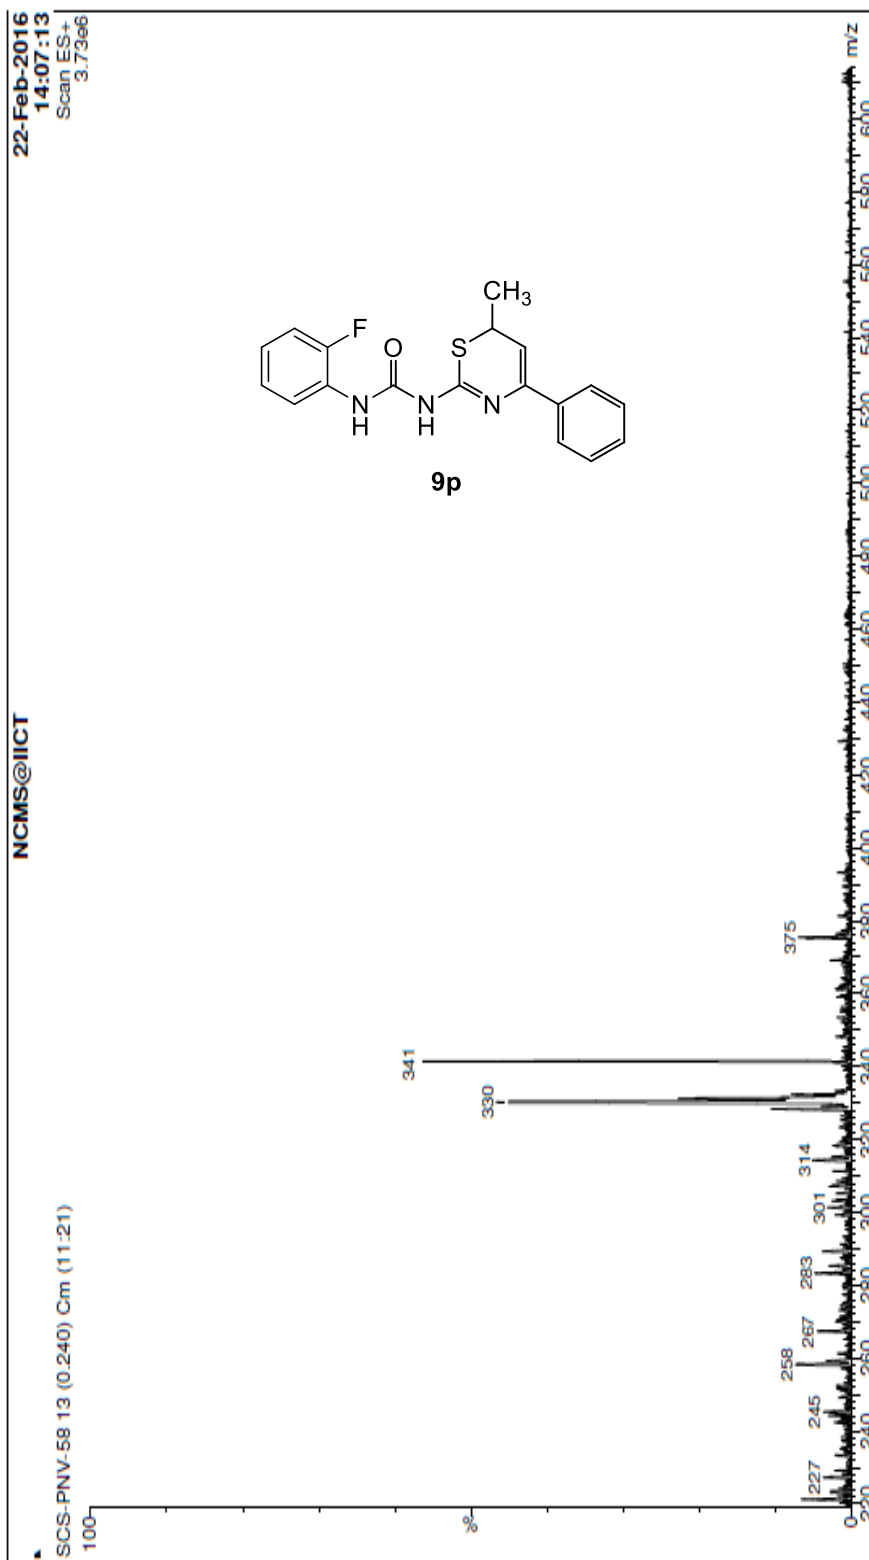

Mass spectrum of compound of 9p

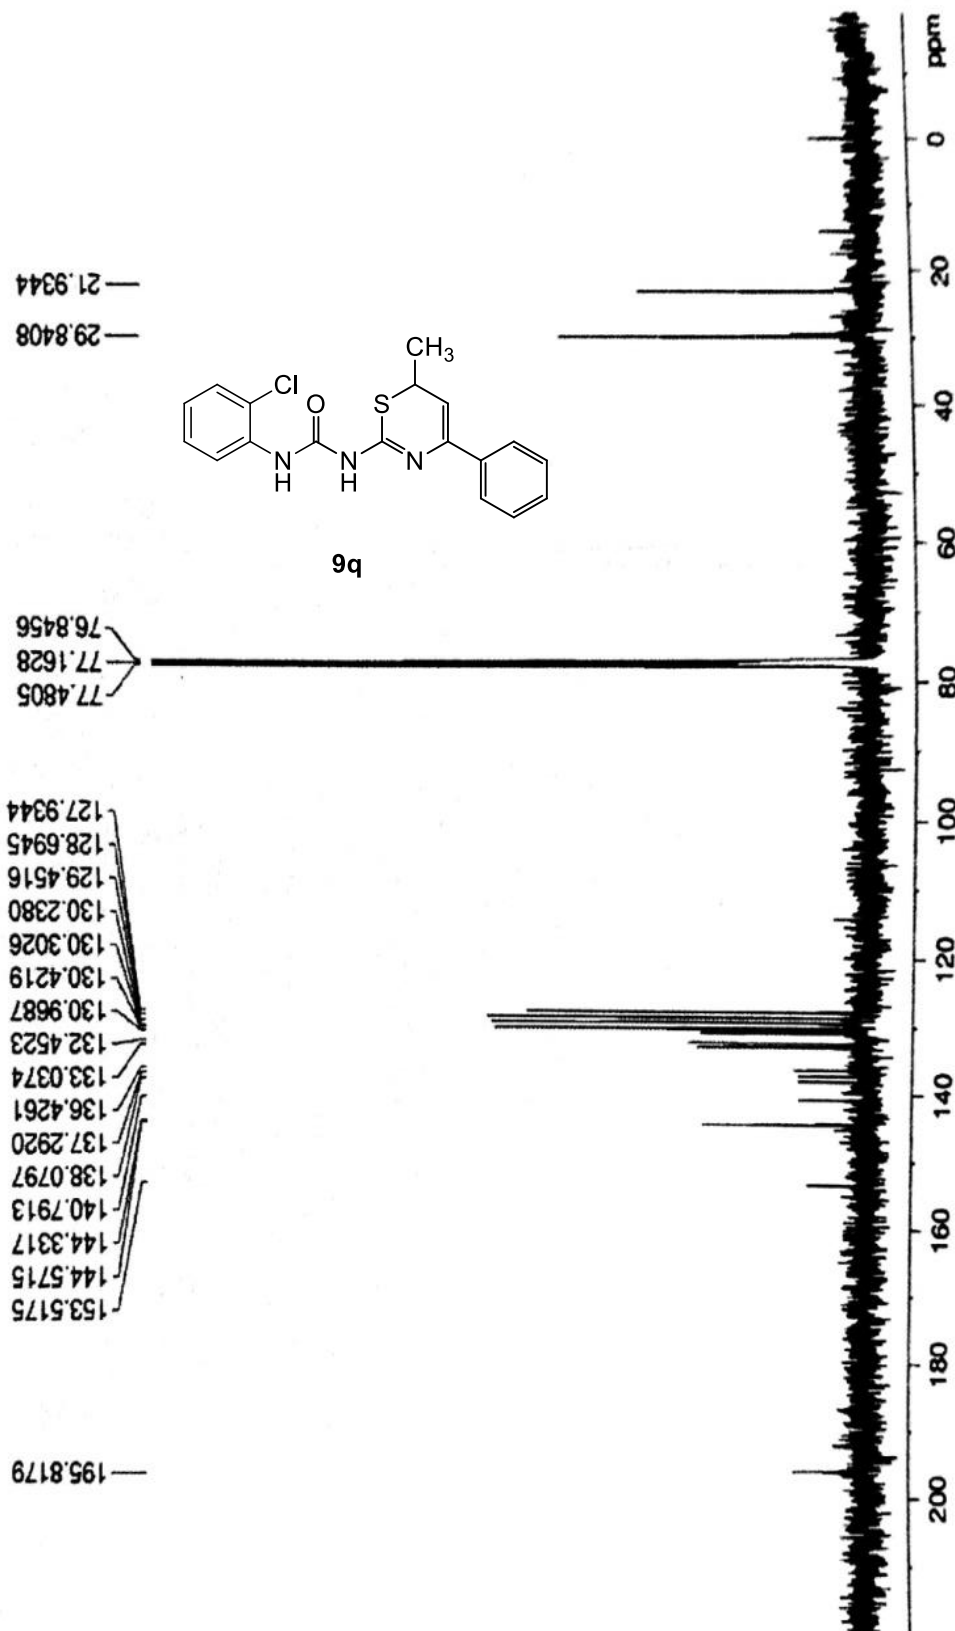

**<sup>13</sup>C NMR of 9b**

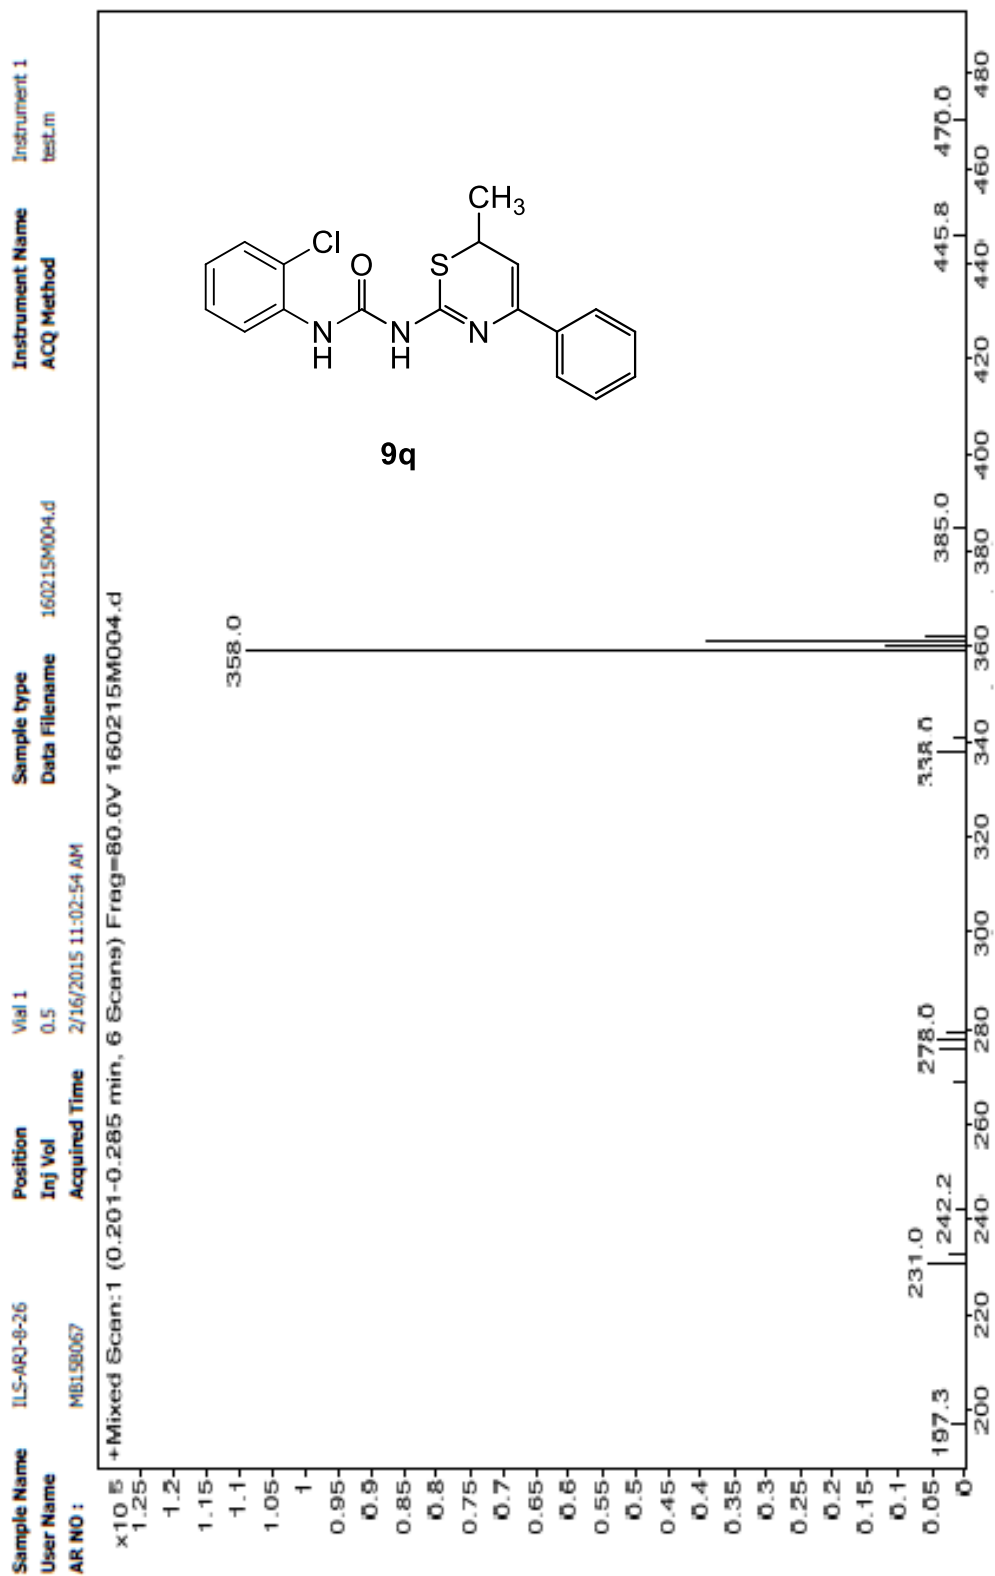

Mass spectrum of compound of 9q

## **References**

- 1) Veeraswamy, S.; Reddy, K. I.; Ragavan, R. V.; Reddy, K. T.; Yennam, S.; Jayashree, A. *Tetrahedron Lett.* **2012**, 53, 4651-4653.
- 2) Jiang, Q.; Gou, T.; Wang, Q.; Wu, P.; Yu, Z. *Adv. Synth. Catal.* **2013**, 355, 1874-1880.
- 3) Lee, A. S-Y.; Wang, S-H.; Chang, Y-T. *J. Chin. Chem. Soc.* **2014**, 61, 364-368.
- 4) Jiang, Q.; Guo, T.; Yu, Z. *Chem. Cat. Chem.* **2015**, 7, 660-665.
- 5) Sawant, R. L.; Bhangale, L. P.; Wadekar, J. B. *Int. J. Drug Design. Dis.* **2011**, 2, 637-641.
- 6) Yadav, L. D. S.; Patel, R.; Rai, V. K.; Srivastava, V. P. *Tetrahedron Lett.* **2007**, 48, 7793-7795.
